# Supplementary material for: Traffic Density Exposure, Oxidative Stress Biomarkers and Plasma Metabolomics in a Population-Based Sample: The Hortega Study
Source: Antioxidants (Basel). 2023 Dec 15;12(12):2122. doi: 10.3390/antiox12122122 (PMC10740723; doi:10.3390/antiox12122122)
Supplement: Supplementary file 1 [file antioxidants-12-02122-s001.zip › antioxidants-2751613-supplementary S2.xlsx]

## Sheet: Description
	Description of Additional Supplementary Tables
	Sheet	Description
genes	Supplementary Sheet S1	Table of Genes identified as asociated with oxidative stress, 352 genes were identified through the MSEA and 55 have been classified as such by Gelain (2009). Approved HGNC nomenclature, except for the pseudogene.
intact	Supplementary Sheet S2	Table of the Complete Unfiltered Interaction network obtained in the IntAct-based interaction analysis. A total of 1330 nodes and 4503 edges were found from our list of under-represented metabolites, genes of the KEGG overrepresented pathways and redox-related candidate genes.
interactions	Supplementary Sheet S3	Table of Proteins Obtained in the IntAct-based interaction analysis. Only nodes of proteins of human origin and molecules are included in the table, self-nodes were removed and interactions with a MI score of at least 0,5 were kept. A total of 468 proteins were found, 7 proteins had two isoforms present in the network(marked with *). 12 proteins were associated to oxidative stress by Gelain (2009…
figura	Supplementary Sheet S4	Table of the Complete Interactions Represented in the Supplementary Figure 2. A total of 468 proteins and its 493 interactions are included with 494 interactions. Approved HGNC nomenclature and protein Preffered ID (UniProtKB, IntActID). 7 proteins had two different isoforms in the network (marked with *). 20 Proteins were, at least, second degree neighbouts of proteins of interest (marked with +)
gpx	Supplementary Sheet S5	Table of IntAct-based interactions between GPX-proteins and proteins in our network. A total of 31 of the proteins in our network interated with a GPX protein, 4 of them interacted with more than one GPX (marked with an *).

## Sheet: Supp Sheet S1
Symbol	Approved name	Previous symbols	Gene source	No Intact Information
CAT	catalase		KEGG, Gelain
GPX1	glutathione peroxidase 1		KEGG, Gelain
GPX2	glutathione peroxidase 2		KEGG, Gelain
GPX3	glutathione peroxidase 3		KEGG, Gelain
GPX4	glutathione peroxidase 4		KEGG, Gelain
GPX5	glutathione peroxidase 5		KEGG, Gelain
GPX6	glutathione peroxidase 6	GPXP3	KEGG, Gelain
GPX7	glutathione peroxidase 7		KEGG, Gelain
GSR	glutathione-disulfide reductase		KEGG, Gelain
TXNDC12	thioredoxin domain containing 12		KEGG, Gelain
AARS1	alanyl-tRNA synthetase 1	AARS	KEGG
AARS2	alanyl-tRNA synthetase 2, mitochondrial	AARSL	KEGG
AASDHPPT	aminoadipate-semialdehyde dehydrogenase-phosphopantetheinyl transferase		KEGG
ACACA	acetyl-CoA carboxylase alpha	ACAC, ACC	KEGG
ACACB	acetyl-CoA carboxylase beta		KEGG
ACAT1	acetyl-CoA acetyltransferase 1	ACAT	KEGG
ACAT2	acetyl-CoA acetyltransferase 2		KEGG
ACO1	aconitase 1	IREB1	KEGG
ACO2	aconitase 2		KEGG
ACOT12	acyl-CoA thioesterase 12		KEGG
ACP1	acid phosphatase 1		KEGG
ACSS1	acyl-CoA synthetase short chain family member 1	ACAS2L	KEGG
ACSS2	acyl-CoA synthetase short chain family member 2	ACAS2	KEGG
ACYP1	acylphosphatase 1		KEGG
ACYP2	acylphosphatase 2		KEGG
ADH1A	alcohol dehydrogenase 1A (class I), alpha polypeptide	ADH1	KEGG
ADH1B	alcohol dehydrogenase 1B (class I), beta polypeptide	ADH2	KEGG
ADH1C	alcohol dehydrogenase 1C (class I), gamma polypeptide	ADH3	KEGG
ADH4	alcohol dehydrogenase 4 (class II), pi polypeptide		KEGG
ADH5	alcohol dehydrogenase 5 (class III), chi polypeptide	FDH	KEGG
ADH6	alcohol dehydrogenase 6 (class V)		KEGG
ADH7	alcohol dehydrogenase 7 (class IV), mu or sigma polypeptide		KEGG
ADI1	acireductone dioxygenase 1		KEGG
ADO	2-aminoethanethiol dioxygenase	C10orf22	KEGG
ADPGK	ADP dependent glucokinase		KEGG
AFMID	arylformamidase		KEGG
AGMAT	agmatinase		KEGG
AGXT	alanine--glyoxylate aminotransferase	SPAT	KEGG
AGXT2	alanine--glyoxylate aminotransferase 2		KEGG
AHCY	adenosylhomocysteinase		KEGG
AHCYL1	adenosylhomocysteinase like 1		KEGG
AHCYL2	adenosylhomocysteinase like 2		KEGG
AK1	adenylate kinase 1		KEGG
AK2	adenylate kinase 2		KEGG
AK4	adenylate kinase 4	AK3, AK3L1	KEGG
AK5	adenylate kinase 5		KEGG
AK7	adenylate kinase 7		KEGG
AK8	adenylate kinase 8	C9orf98	KEGG
AKR1A1	aldo-keto reductase family 1 member A1		KEGG
ALAS1	5'-aminolevulinate synthase 1	ALAS3, ALAS	KEGG
ALAS2	5'-aminolevulinate synthase 2	ASB	KEGG
ALDH18A1	aldehyde dehydrogenase 18 family member A1	GSAS, PYCS, SPG9	KEGG
ALDH1A3	aldehyde dehydrogenase 1 family member A3	ALDH6	KEGG
ALDH1B1	aldehyde dehydrogenase 1 family member B1	ALDH5	KEGG
ALDH2	aldehyde dehydrogenase 2 family member		KEGG
ALDH3A1	aldehyde dehydrogenase 3 family member A1	ALDH3	KEGG
ALDH3A2	aldehyde dehydrogenase 3 family member A2	SLS, ALDH10	KEGG
ALDH3B1	aldehyde dehydrogenase 3 family member B1	ALDH7	KEGG
ALDH3B2	aldehyde dehydrogenase 3 family member B2	ALDH8	KEGG
ALDH4A1	aldehyde dehydrogenase 4 family member A1	ALDH4	KEGG
ALDH7A1	aldehyde dehydrogenase 7 family member A1	ATQ1	KEGG
ALDH9A1	aldehyde dehydrogenase 9 family member A1	ALDH7, ALDH4, ALDH9	KEGG
ALDOA	aldolase, fructose-bisphosphate A		KEGG
ALDOB	aldolase, fructose-bisphosphate B		KEGG
ALDOC	aldolase, fructose-bisphosphate C		KEGG
ALPG	alkaline phosphatase, germ cell	ALPPL2	KEGG
ALPI	alkaline phosphatase, intestinal		KEGG
ALPL	alkaline phosphatase, biomineralization associated	HOPS	KEGG
ALPP	alkaline phosphatase, placental		KEGG
AMD1	adenosylmethionine decarboxylase 1		KEGG
AMT	aminomethyltransferase		KEGG
ANPEP	alanyl aminopeptidase, membrane	CD13, PEPN	KEGG
AOC1	amine oxidase copper containing 1	ABP1, ABP	KEGG
AOC2	amine oxidase copper containing 2		KEGG
AOC3	amine oxidase copper containing 3		KEGG
APIP	APAF1 interacting protein		KEGG
ARG1	arginase 1		KEGG
ARG2	arginase 2		KEGG
AZIN2	antizyme inhibitor 2	ADC	KEGG
BAAT	bile acid-CoA:amino acid N-acyltransferase		KEGG
BCAT1	branched chain amino acid transaminase 1	BCT1	KEGG
BCAT2	branched chain amino acid transaminase 2	BCT2	KEGG
BHMT	betaine--homocysteine S-methyltransferase		KEGG
BHMT2	betaine--homocysteine S-methyltransferase 2		KEGG
BPGM	bisphosphoglycerate mutase		KEGG
CARNS1	carnosine synthase 1	ATPGD1	KEGG
CARS1	cysteinyl-tRNA synthetase 1	CARS	KEGG
CARS2	cysteinyl-tRNA synthetase 2, mitochondrial		KEGG
CBS	cystathionine beta-synthase		KEGG
CBSL	cystathionine beta-synthase like		KEGG	No Data
CDO1	cysteine dioxygenase type 1		KEGG
CHAC1	ChaC glutathione specific gamma-glutamylcyclotransferase 1		KEGG
CHAC2	ChaC glutathione specific gamma-glutamylcyclotransferase 2		KEGG
CHDH	choline dehydrogenase		KEGG
CKB	creatine kinase B	CKBB	KEGG
CKM	creatine kinase, M-type	CKMM	KEGG
CKMT1A	creatine kinase, mitochondrial 1A	CKMT1	KEGG
CKMT1B	creatine kinase, mitochondrial 1B	CKMT, CKMT1	KEGG
CKMT2	creatine kinase, mitochondrial 2		KEGG
CNDP1	carnosine dipeptidase 1		KEGG
CNDP2	carnosine dipeptidase 2	PEPA	KEGG
COASY	Coenzyme A synthase		KEGG
CS	citrate synthase		KEGG
CSAD	cysteine sulfinic acid decarboxylase		KEGG
CTH	cystathionine gamma-lyase		KEGG
DAO	D-amino acid oxidase		KEGG
DARS1	aspartyl-tRNA synthetase 1	DARS	KEGG
DARS2	aspartyl-tRNA synthetase 2, mitochondrial		KEGG
DLAT	dihydrolipoamide S-acetyltransferase	DLTA	KEGG
DLD	dihydrolipoamide dehydrogenase	LAD, GCSL	KEGG
DMGDH	dimethylglycine dehydrogenase		KEGG
DNMT1	DNA methyltransferase 1	DNMT	KEGG
DNMT3A	DNA methyltransferase 3 alpha		KEGG
DNMT3B	DNA methyltransferase 3 beta		KEGG
DPYD	dihydropyrimidine dehydrogenase		KEGG
DPYS	dihydropyrimidinase		KEGG
EARS2	glutamyl-tRNA synthetase 2, mitochondrial		KEGG
ENO1	enolase 1	ENO1L1, MPB1, ENO1-IT1	KEGG
ENO2	enolase 2		KEGG
ENO3	enolase 3		KEGG
ENO4	enolase 4	C10orf134	KEGG
ENOPH1	enolase-phosphatase 1		KEGG
ENPP1	ectonucleotide pyrophosphatase/phosphodiesterase 1	NPPS, M6S1, PDNP1	KEGG
ENPP3	ectonucleotide pyrophosphatase/phosphodiesterase 3	PDNP3	KEGG
EPRS1	glutamyl-prolyl-tRNA synthetase 1	QPRS, QARS, EPRS	KEGG
FARS2	phenylalanyl-tRNA synthetase 2, mitochondrial	FARS1	KEGG
FARSA	phenylalanyl-tRNA synthetase subunit alpha	FARSL, FARSLA	KEGG
FARSB	phenylalanyl-tRNA synthetase subunit beta	FARSLB	KEGG
FBP1	fructose-bisphosphatase 1	FBP	KEGG
FBP2	fructose-bisphosphatase 2		KEGG
FH	fumarate hydratase		KEGG
G6PC1	glucose-6-phosphatase catalytic subunit 1	G6PT, G6PC	KEGG
G6PC2	glucose-6-phosphatase catalytic subunit 2		KEGG	No Data
G6PC3	glucose-6-phosphatase catalytic subunit 3		KEGG
G6PD	glucose-6-phosphate dehydrogenase		KEGG
GAD1	glutamate decarboxylase 1	GAD	KEGG
GAD2	glutamate decarboxylase 2		KEGG
GADL1	glutamate decarboxylase like 1		KEGG
GALM	galactose mutarotase		KEGG
GAMT	guanidinoacetate N-methyltransferase		KEGG
GAPDH	glyceraldehyde-3-phosphate dehydrogenase	GAPD	KEGG
GAPDHS	glyceraldehyde-3-phosphate dehydrogenase, spermatogenic	GAPDS	KEGG
GARS1	glycyl-tRNA synthetase 1	CMT2D, GARS	KEGG
GATB	glutamyl-tRNA amidotransferase subunit B	PET112L, PET112	KEGG
GATC	glutamyl-tRNA amidotransferase subunit C		KEGG
GATM	glycine amidinotransferase		KEGG
GCAT	glycine C-acetyltransferase		KEGG
GCK	glucokinase	MODY2	KEGG
GCLC	glutamate-cysteine ligase catalytic subunit	GLCLC, GLCL	KEGG
GCLM	glutamate-cysteine ligase modifier subunit	GLCLR	KEGG
GCSH	glycine cleavage system protein H		KEGG
GGCT	gamma-glutamylcyclotransferase	C7orf24, GCTG	KEGG
GGT1	gamma-glutamyltransferase 1	GGT	KEGG
GGT5	gamma-glutamyltransferase 5	GGTLA1	KEGG
GGT6	gamma-glutamyltransferase 6		KEGG
GGT7	gamma-glutamyltransferase 7	GGTL5, GGTL3	KEGG
GLDC	glycine decarboxylase		KEGG
GLO1	glyoxalase I		KEGG
GLUL	glutamate-ammonia ligase	GLNS	KEGG
GLYCTK	glycerate kinase		KEGG
GNMT	glycine N-methyltransferase		KEGG
GOT1	glutamic-oxaloacetic transaminase 1		KEGG
GOT2	glutamic-oxaloacetic transaminase 2		KEGG
GPI	glucose-6-phosphate isomerase		KEGG
GPX8	glutathione peroxidase 8 (putative)		KEGG
GRHPR	glyoxylate and hydroxypyruvate reductase	GLXR	KEGG
GSS	glutathione synthetase		KEGG
GSTA1	glutathione S-transferase alpha 1		KEGG
GSTA2	glutathione S-transferase alpha 2	GST2	KEGG
GSTA3	glutathione S-transferase alpha 3		KEGG
GSTA4	glutathione S-transferase alpha 4		KEGG
GSTA5	glutathione S-transferase alpha 5		KEGG
GSTK1	glutathione S-transferase kappa 1		KEGG
GSTM1	glutathione S-transferase mu 1	GST1	KEGG
GSTM2	glutathione S-transferase mu 2		KEGG
GSTM3	glutathione S-transferase mu 3		KEGG
GSTM4	glutathione S-transferase mu 4		KEGG
GSTM5	glutathione S-transferase mu 5		KEGG
GSTO1	glutathione S-transferase omega 1		KEGG
GSTO2	glutathione S-transferase omega 2		KEGG
GSTP1	glutathione S-transferase pi 1	FAEES3, GST3	KEGG
GSTT2	glutathione S-transferase theta 2 (gene/pseudogene)		KEGG
GSTT2B	glutathione S-transferase theta 2B		KEGG
HAGH	hydroxyacylglutathione hydrolase		KEGG
HAO1	hydroxyacid oxidase 1	GOX1	KEGG
HAO2	hydroxyacid oxidase 2		KEGG
HARS1	histidyl-tRNA synthetase 1	USH3B, HARS	KEGG
HARS2	histidyl-tRNA synthetase 2, mitochondrial	HARSL	KEGG
HK1	hexokinase 1		KEGG
HK2	hexokinase 2		KEGG
HK3	hexokinase 3		KEGG
HKDC1	hexokinase domain containing 1		KEGG
HOGA1	4-hydroxy-2-oxoglutarate aldolase 1	C10orf65, DHDPSL	KEGG
HPGDS	hematopoietic prostaglandin D synthase		KEGG
HYI	hydroxypyruvate isomerase (putative)		KEGG
IARS1	isoleucyl-tRNA synthetase 1	IARS	KEGG
IARS2	isoleucyl-tRNA synthetase 2, mitochondrial		KEGG
IDH1	isocitrate dehydrogenase (NADP(+)) 1		KEGG
IDH2	isocitrate dehydrogenase (NADP(+)) 2		KEGG
IL4I1	interleukin 4 induced 1		KEGG
KARS1	lysyl-tRNA synthetase 1	DFNB89, KARS	KEGG
KYAT1	kynurenine aminotransferase 1	CCBL1	KEGG
KYAT3	kynurenine aminotransferase 3	CCBL2	KEGG
L3HYPDH	trans-L-3-hydroxyproline dehydratase	C14orf149	KEGG
LAP3	leucine aminopeptidase 3	PEPS	KEGG
LARS1	leucyl-tRNA synthetase 1	LARS	KEGG
LARS2	leucyl-tRNA synthetase 2, mitochondrial		KEGG
LDHA	lactate dehydrogenase A		KEGG
LDHAL6A	lactate dehydrogenase A like 6A		KEGG
LDHAL6B	lactate dehydrogenase A like 6B	LDHAL6	KEGG
LDHB	lactate dehydrogenase B		KEGG
LDHC	lactate dehydrogenase C		KEGG
LDHD	lactate dehydrogenase D		KEGG
LOC390877	pseudogene, adenylate kinase isoenzyme 1-like		KEGG	No Data
MAOA	monoamine oxidase A		KEGG
MAOB	monoamine oxidase B		KEGG
MARS1	methionyl-tRNA synthetase 1	MARS	KEGG
MARS2	methionyl-tRNA synthetase 2, mitochondrial		KEGG
MAT1A	methionine adenosyltransferase 1A		KEGG
MAT2A	methionine adenosyltransferase 2A		KEGG
MAT2B	methionine adenosyltransferase 2 non-catalytic beta subunit		KEGG
MCEE	methylmalonyl-CoA epimerase		KEGG
MDH1	malate dehydrogenase 1		KEGG
MDH2	malate dehydrogenase 2		KEGG
ME1	malic enzyme 1		KEGG
ME2	malic enzyme 2		KEGG
ME3	malic enzyme 3		KEGG
MGST1	microsomal glutathione S-transferase 1	GST12	KEGG
MGST2	microsomal glutathione S-transferase 2		KEGG
MGST3	microsomal glutathione S-transferase 3		KEGG
MINPP1	multiple inositol-polyphosphate phosphatase 1		KEGG
MMUT	methylmalonyl-CoA mutase	MUT	KEGG
MPST	mercaptopyruvate sulfurtransferase		KEGG
MRI1	methylthioribose-1-phosphate isomerase 1		KEGG
MTAP	methylthioadenosine phosphorylase		KEGG
MTFMT	mitochondrial methionyl-tRNA formyltransferase		KEGG
MTR	5-methyltetrahydrofolate-homocysteine methyltransferase		KEGG
MT-TA	mitochondrially encoded tRNA-Ala (GCN)	MTTA	KEGG	No Data
MT-TC	mitochondrially encoded tRNA-Cys (UGU/C)	MTTC	KEGG	No Data
MT-TD	mitochondrially encoded tRNA-Asp (GAU/C)	MTTD	KEGG	No Data
MT-TE	mitochondrially encoded tRNA-Glu (GAA/G)	MTTE	KEGG	No Data
MT-TF	mitochondrially encoded tRNA-Phe (UUU/C)	MTTF	KEGG	No Data
MT-TG	mitochondrially encoded tRNA-Gly (GGN)	MTTG	KEGG	No Data
MT-TH	mitochondrially encoded tRNA-His (CAU/C)	MTTH	KEGG	No Data
MT-TI	mitochondrially encoded tRNA-Ile (AUU/C)	MTTI	KEGG	No Data
MT-TK	mitochondrially encoded tRNA-Lys (AAA/G)	MERRF, MTTK	KEGG
MT-TL1	mitochondrially encoded tRNA-Leu (UUA/G) 1	MTTL1	KEGG	No Data
MT-TL2	mitochondrially encoded tRNA-Leu (CUN) 2	MTTL2	KEGG	No Data
MT-TM	mitochondrially encoded tRNA-Met (AUA/G)	MTTM	KEGG	No Data
MT-TN	mitochondrially encoded tRNA-Asn (AAU/C)	MTTN	KEGG	No Data
MT-TP	mitochondrially encoded tRNA-Pro (CCN)	MTTP	KEGG	No Data
MT-TQ	mitochondrially encoded tRNA-Gln (CAA/G)	MTTQ	KEGG	No Data
MT-TR	mitochondrially encoded tRNA-Arg (CGN)	MTTR	KEGG	No Data
MT-TS1	mitochondrially encoded tRNA-Ser (UCN) 1	MTTS1	KEGG	No Data
MT-TS2	mitochondrially encoded tRNA-Ser (AGU/C) 2	MTTS2	KEGG	No Data
MT-TT	mitochondrially encoded tRNA-Thr (ACN)	MTTT, LIMM	KEGG	No Data
MT-TV	mitochondrially encoded tRNA-Val (GUN)	MTTV	KEGG	No Data
MT-TW	mitochondrially encoded tRNA-Trp (UGA/G)	MTTW	KEGG	No Data
MT-TY	mitochondrially encoded tRNA-Tyr (UAU/C)	MTTY	KEGG	No Data
NARS1	asparaginyl-tRNA synthetase 1	NARS	KEGG
NARS2	asparaginyl-tRNA synthetase 2, mitochondrial	DFNB94	KEGG
NAT8	N-acetyltransferase 8 (putative)		KEGG
NAT8B	N-acetyltransferase 8B (putative, gene/pseudogene)		KEGG
NFS1	NFS1 cysteine desulfurase		KEGG
NOS1	nitric oxide synthase 1	NOS	KEGG
NOS2	nitric oxide synthase 2	NOS2A	KEGG
NOS3	nitric oxide synthase 3		KEGG
NTPCR	nucleoside-triphosphatase, cancer-related	C1orf57	KEGG
OAT	ornithine aminotransferase		KEGG
ODC1	ornithine decarboxylase 1		KEGG
OPLAH	5-oxoprolinase, ATP-hydrolysing		KEGG
P4HA1	prolyl 4-hydroxylase subunit alpha 1	P4HA	KEGG
P4HA2	prolyl 4-hydroxylase subunit alpha 2		KEGG
P4HA3	prolyl 4-hydroxylase subunit alpha 3		KEGG
PANK1	pantothenate kinase 1	PANK	KEGG
PANK2	pantothenate kinase 2	C20orf48, NBIA1	KEGG
PANK3	pantothenate kinase 3		KEGG
PANK4	pantothenate kinase 4 (inactive)		KEGG
PARS2	prolyl-tRNA synthetase 2, mitochondrial		KEGG
PC	pyruvate carboxylase		KEGG
PCCA	propionyl-CoA carboxylase subunit alpha		KEGG
PCCB	propionyl-CoA carboxylase subunit beta		KEGG
PCK1	phosphoenolpyruvate carboxykinase 1		KEGG
PCK2	phosphoenolpyruvate carboxykinase 2, mitochondrial		KEGG
PDHA1	pyruvate dehydrogenase E1 subunit alpha 1	PDHA	KEGG
PDHA2	pyruvate dehydrogenase E1 subunit alpha 2	PDHAL	KEGG
PDHB	pyruvate dehydrogenase E1 subunit beta		KEGG
PFKL	phosphofructokinase, liver type		KEGG
PFKM	phosphofructokinase, muscle	PFKX	KEGG
PFKP	phosphofructokinase, platelet		KEGG
PGAM1	phosphoglycerate mutase 1	PGAMA	KEGG
PGAM2	phosphoglycerate mutase 2		KEGG
PGAM4	phosphoglycerate mutase family member 4		KEGG
PGD	phosphogluconate dehydrogenase		KEGG
PGK1	phosphoglycerate kinase 1		KEGG
PGK2	phosphoglycerate kinase 2		KEGG
PGM1	phosphoglucomutase 1		KEGG
PGM2	phosphoglucomutase 2		KEGG
PGP	phosphoglycolate phosphatase		KEGG
PHGDH	phosphoglycerate dehydrogenase		KEGG
PIPOX	pipecolic acid and sarcosine oxidase		KEGG
PKLR	pyruvate kinase L/R		KEGG
PKM	pyruvate kinase M1/2	PKM2	KEGG
PPCDC	phosphopantothenoylcysteine decarboxylase		KEGG
PPCS	phosphopantothenoylcysteine synthetase		KEGG
PRODH	proline dehydrogenase 1		KEGG
PRODH2	proline dehydrogenase 2		KEGG	No Data
PSAT1	phosphoserine aminotransferase 1		KEGG
PSPH	phosphoserine phosphatase	PSP	KEGG
PSTK	phosphoseryl-tRNA kinase	C10orf89	KEGG
PYCR1	pyrroline-5-carboxylate reductase 1		KEGG
PYCR2	pyrroline-5-carboxylate reductase 2		KEGG
PYCR3	pyrroline-5-carboxylate reductase 3	PYCRL	KEGG
QARS1	glutaminyl-tRNA synthetase 1	QARS	KEGG
QRSL1	glutaminyl-tRNA amidotransferase subunit QRSL1		KEGG
RARS1	arginyl-tRNA synthetase 1	RARS	KEGG
RARS2	arginyl-tRNA synthetase 2, mitochondrial	RARSL	KEGG
RRM1	ribonucleotide reductase catalytic subunit M1		KEGG
RRM2	ribonucleotide reductase regulatory subunit M2	C2orf48	KEGG
RRM2B	ribonucleotide reductase regulatory TP53 inducible subunit M2B		KEGG
SARDH	sarcosine dehydrogenase	DMGDHL1	KEGG
SARS1	seryl-tRNA synthetase 1	SARS	KEGG
SARS2	seryl-tRNA synthetase 2, mitochondrial	SARSM	KEGG
SAT1	spermidine/spermine N1-acetyltransferase 1	SAT	KEGG
SAT2	spermidine/spermine N1-acetyltransferase family member 2		KEGG
SDS	serine dehydratase		KEGG
SDSL	serine dehydratase like		KEGG
SEPSECS	Sep (O-phosphoserine) tRNA:Sec (selenocysteine) tRNA synthase		KEGG
SHMT1	serine hydroxymethyltransferase 1		KEGG
SHMT2	serine hydroxymethyltransferase 2	SHMT	KEGG
SMOX	spermine oxidase	C20orf16	KEGG
SMS	spermine synthase	SRS	KEGG
SRM	spermidine synthase	SRML1	KEGG
SRR	serine racemase		KEGG
TARS1	threonyl-tRNA synthetase 1	TARS	KEGG
TARS2	threonyl-tRNA synthetase 2, mitochondrial	TARSL1	KEGG
TARS3	threonyl-tRNA synthetase 3	TARSL2	KEGG
TAT	tyrosine aminotransferase		KEGG
THTPA	thiamine triphosphatase		KEGG
TPI1	triosephosphate isomerase 1		KEGG
TPK1	thiamin pyrophosphokinase 1		KEGG
TST	thiosulfate sulfurtransferase		KEGG
UPB1	beta-ureidopropionase 1		KEGG
VARS1	valyl-tRNA synthetase 1	VARS2, VARS	KEGG
VARS2	valyl-tRNA synthetase 2, mitochondrial	VARS2L, VARSL	KEGG
VNN1	vanin 1		KEGG	No Data
VNN2	vanin 2		KEGG
VNN3P	vanin 3, pseudogene	VNN3	KEGG	No Data
WARS1	tryptophanyl-tRNA synthetase 1	IFI53, WARS	KEGG
WARS2	tryptophanyl tRNA synthetase 2, mitochondrial		KEGG
YARS1	tyrosyl-tRNA synthetase 1	YARS	KEGG
YARS2	tyrosyl-tRNA synthetase 2		KEGG
CCS	copper chaperone for superoxide dismutase		Gelain
CP	ceruloplasmin		Gelain
ERP44	endoplasmic reticulum protein 44	TXNDC4	Gelain
GLRX	glutaredoxin		Gelain
GLRX2	glutaredoxin 2		Gelain
GLRX3	glutaredoxin 3	TXNL2	Gelain
GLRX5	glutaredoxin 5	C14orf87	Gelain
LPO	lactoperoxidase		Gelain
MPO	myeloperoxidase		Gelain
MSRA	methionine sulfoxide reductase A		Gelain
MT1A	metallothionein 1A	MT1, MT1S	Gelain
MT1B	metallothionein 1B	MT1, MT1Q	Gelain
MT1E	metallothionein 1E	MT1	Gelain
MT1F	metallothionein 1F	MT1	Gelain
MT1G	metallothionein 1G	MT1	Gelain
MT1H	metallothionein 1H	MT1	Gelain
MT1M	metallothionein 1M	MT1, MT1K	Gelain
MT1X	metallothionein 1X	MT1	Gelain
MT2A	metallothionein 2A	MT2	Gelain
NME8	NME/NM23 family member 8	TXNDC3	Gelain
NME9	NME/NM23 family member 9	TXNDC6	Gelain	No Data
NXNL1	nucleoredoxin like 1	TXNL6	Gelain
PDIA6	protein disulfide isomerase family A member 6	TXNDC7	Gelain
PRDX1	peroxiredoxin 1	PAGA	Gelain
PRDX2	peroxiredoxin 2	TDPX1	Gelain
PRDX3	peroxiredoxin 3	AOP1	Gelain
PRDX4	peroxiredoxin 4		Gelain
PRDX5	peroxiredoxin 5		Gelain
PRDX6	peroxiredoxin 6		Gelain
SELENOF	selenoprotein F	SEPP1	Gelain
SOD1	superoxide dismutase 1	ALS, ALS1	Gelain
SOD2	superoxide dismutase 2		Gelain
SOD3	superoxide dismutase 3		Gelain
SRXN1	sulfiredoxin 1	C20orf139	Gelain
TMX1	thioredoxin related transmembrane protein 1	TXNDC, TXNDC1	Gelain
TMX2	thioredoxin related transmembrane protein 2	TXNDC14	Gelain
TMX3	thioredoxin related transmembrane protein 3	TXNDC10	Gelain
TMX4	thioredoxin related transmembrane protein 4	TXNDC13	Gelain
TXN	thioredoxin		Gelain
TXN2	thioredoxin 2		Gelain
TXNDC11	thioredoxin domain containing 11		Gelain
TXNDC17	thioredoxin domain containing 17	TXNL5	Gelain
TXNDC2	thioredoxin domain containing 2		Gelain
TXNDC5	thioredoxin domain containing 5		Gelain
TXNDC8	thioredoxin domain containing 8		Gelain	No Data
TXNDC9	thioredoxin domain containing 9		Gelain
TXNIP	thioredoxin interacting protein		Gelain
TXNL1	thioredoxin like 1	TXNL	Gelain
TXNL4A	thioredoxin like 4A	TXNL4	Gelain
TXNL4B	thioredoxin like 4B		Gelain
TXNRD1	thioredoxin reductase 1		Gelain
TXNRD2	thioredoxin reductase 2		Gelain
TXNRD3	thioredoxin reductase 3	TXNRD3NB, TXNRD3IT1	Gelain

## Sheet: Supp Sheet S2
IntAct - Source::Source biological role	IntAct - Source::Source biological role MI identifier	IntAct - Source::Source experimental role	IntAct - Source::Source experimental role MI identifier	IntAct - Source::Source features	IntAct - Summary::# Summarized edges	IntAct - Summary::Is summary	IntAct - Summary::Summarized edges SUID	IntAct - Target::Target biological role	IntAct - Target::Target biological role MI identifier	IntAct - Target::Target experimental role	IntAct - Target::Target experimental role MI identifier	IntAct - Target::Target features	IntAct::Accession	IntAct::Affected by mutation	IntAct::Expansion type	IntAct::Host organism	IntAct::Host organism taxon id	IntAct::ID	IntAct::Interaction detection method	IntAct::Interaction detection method MI identifier	IntAct::MI Score	IntAct::Participant detection method	IntAct::Participant detection method MI identifier	IntAct::PubMed Id	interaction	interaction MI identifier	name	selected	shared interaction	shared name
unspecified role	MI:0499	bait	MI:0496	EBI-8770068|EBI-8771428		false		unspecified role	MI:0499	prey	MI:0498		EBI-8769968	false	spoke expansion	Homo sapiens	9606	11719477	tandem affinity purification	MI:0676	0.35	sequence tag identification	MI:0102	24189400	association	MI:0914	EGFR (association) GGCT	false	association	EGFR (association) GGCT
unspecified role	MI:0499	bait	MI:0496	EBI-4397206|EBI-4397204		false		unspecified role	MI:0499	prey	MI:0498	EBI-5234626	EBI-4397200	false		Saccharomyces cerevisiae (Baker's yeast)	4932	9385318	ubiquitin reconstruction	MI:0112	0.55	nucleotide sequence identification	MI:0078	20029029	physical association	MI:0915	EGFR (physical association) SELENOP	false	physical association	EGFR (physical association) SELENOP
				EBI-8771428|EBI-8770068	1	true	23360|11818							false							0.35						EGFR (interact with) GGCT	false		EGFR (interact with) GGCT
				EBI-25371433|EBI-4397204|EBI-4397206	2	true	23362|32222|11816|2956					EBI-5234626|EBI-25371437		false							0.55						EGFR (interact with) SELENOP	false		EGFR (interact with) SELENOP
unspecified role	MI:0499	bait	MI:0496	EBI-6912352		false		unspecified role	MI:0499	prey	MI:0498		EBI-6912271	false	spoke expansion	Homo sapiens transformed primary embryonal kidney cells	9606	10089708	anti tag coimmunoprecipitation	MI:0007	0.35	sequence tag identification	MI:0102	24366813	association	MI:0914	RASSF10 (association) GGCT	false	association	RASSF10 (association) GGCT
				EBI-6912352	1	true	23368|11810							false							0.35						RASSF10 (interact with) GGCT	false		RASSF10 (interact with) GGCT
unspecified role	MI:0499	bait	MI:0496	EBI-6912264		false		unspecified role	MI:0499	prey	MI:0498		EBI-6912184	false	spoke expansion	Homo sapiens transformed primary embryonal kidney cells	9606	10089620	anti tag coimmunoprecipitation	MI:0007	0.35	sequence tag identification	MI:0102	24366813	association	MI:0914	RASSF9 (association) GGCT	false	association	RASSF9 (association) GGCT
				EBI-6912264	1	true	23372|11806							false							0.35						RASSF9 (interact with) GGCT	false		RASSF9 (interact with) GGCT
unspecified role	MI:0499	bait	MI:0496	EBI-6912163		false		unspecified role	MI:0499	prey	MI:0498		EBI-6912138	false	spoke expansion	Homo sapiens transformed primary embryonal kidney cells	9606	10089548	anti tag coimmunoprecipitation	MI:0007	0.35	sequence tag identification	MI:0102	24366813	association	MI:0914	RASSF7 (association) GGCT	false	association	RASSF7 (association) GGCT
				EBI-6912163	1	true	23376|11802							false							0.35						RASSF7 (interact with) GGCT	false		RASSF7 (interact with) GGCT
unspecified role	MI:0499	bait	MI:0496	EBI-34582473		false		unspecified role	MI:0499	prey	MI:0498		EBI-34582470	false	spoke expansion	Human non-transformed breast epithelial cell line	9606	8982436	anti tag coimmunoprecipitation	MI:0007	0.35	Identification by mass spectrometry	MI:0427	34591612	association	MI:0914	MSH2 (association) GGCT	false	association	MSH2 (association) GGCT
				EBI-34582473	1	true	23380|11798							false							0.35						MSH2 (interact with) GGCT	false		MSH2 (interact with) GGCT
unspecified role	MI:0499	bait	MI:0496	EBI-25568054		false		unspecified role	MI:0499	prey	MI:0498		EBI-25568051	false	spoke expansion	Homo sapiens 293 cells transformed with SV40 large T antigen	9606	7441209	anti tag coimmunoprecipitation	MI:0007	0.35	sequence tag identification	MI:0102	unassigned2293	association	MI:0914	P (association) GGCT	false	association	P (association) GGCT
unspecified role	MI:0499	bait	MI:0496	EBI-25568047		false		unspecified role	MI:0499	prey	MI:0498		EBI-25568044	false	spoke expansion	Homo sapiens 293 cells transformed with SV40 large T antigen	9606	7436807	anti tag coimmunoprecipitation	MI:0007	0.35	sequence tag identification	MI:0102	unassigned2293	association	MI:0914	P (association) GGCT	false	association	P (association) GGCT
unspecified role	MI:0499	bait	MI:0496	EBI-25568054		false		unspecified role	MI:0499	prey	MI:0498		EBI-25568051	false	spoke expansion	Homo sapiens 293 cells transformed with SV40 large T antigen	9606	7440347	anti tag coimmunoprecipitation	MI:0007	0.35	sequence tag identification	MI:0102	unassigned2293	association	MI:0914	P (association) AASDHPPT	false	association	P (association) AASDHPPT
unspecified role	MI:0499	bait	MI:0496	EBI-25568054		false		unspecified role	MI:0499	prey	MI:0498		EBI-25568051	false	spoke expansion	Homo sapiens 293 cells transformed with SV40 large T antigen	9606	7443908	anti tag coimmunoprecipitation	MI:0007	0.35	sequence tag identification	MI:0102	unassigned2293	association	MI:0914	P (association) SRM	false	association	P (association) SRM
				EBI-25568054	1	true	23390|11788							false							0.35						P (interact with) SRM	false		P (interact with) SRM
				EBI-25568054|EBI-25568047	2	true	23384|23386|11792|11794							false							0.35						P (interact with) GGCT	false		P (interact with) GGCT
				EBI-25568054	1	true	23388|11790							false							0.35						P (interact with) AASDHPPT	false		P (interact with) AASDHPPT
unspecified role	MI:0499	bait	MI:0496	EBI-25486899		false		unspecified role	MI:0499	prey	MI:0498		EBI-25486895	false	spoke expansion	Homo sapiens transformed primary embryonal kidney cells	9606	7359895	tandem affinity purification	MI:0676	0.35	sequence tag identification	MI:0102	24981860	association	MI:0914	WRAP73 (association) GGCT	false	association	WRAP73 (association) GGCT
				EBI-25486899	1	true	23398|11780							false							0.35						WRAP73 (interact with) GGCT	false		WRAP73 (interact with) GGCT
unspecified role	MI:0499	bait	MI:0496	EBI-25485864		false		unspecified role	MI:0499	prey	MI:0498		EBI-25485860	false	spoke expansion	Homo sapiens transformed primary embryonal kidney cells	9606	7358943	tandem affinity purification	MI:0676	0.35	sequence tag identification	MI:0102	24981860	association	MI:0914	TDRKH (association) GGCT	false	association	TDRKH (association) GGCT
				EBI-25485864	1	true	23402|11776							false							0.35						TDRKH (interact with) GGCT	false		TDRKH (interact with) GGCT
unspecified role	MI:0499	bait	MI:0496			false		unspecified role	MI:0499	prey	MI:0498		EBI-25474141	false	spoke expansion	Homo sapiens - sperm	9606	7347684	anti bait coimmunoprecipitation	MI:0006	0.35	sequence tag identification	MI:0102	30824926	association	MI:0914	GSK3B (association) GGCT	false	association	GSK3B (association) GGCT
					1	true	23406|11772							false							0.35						GSK3B (interact with) GGCT	false		GSK3B (interact with) GGCT
unspecified role	MI:0499	bait	MI:0496			false		unspecified role	MI:0499	prey	MI:0498		EBI-25474105	false	spoke expansion	Homo sapiens - sperm	9606	7347619	anti bait coimmunoprecipitation	MI:0006	0.35	sequence tag identification	MI:0102	30824926	association	MI:0914	GSK3A (association) GGCT	false	association	GSK3A (association) GGCT
					1	true	23410|11768							false							0.35						GSK3A (interact with) GGCT	false		GSK3A (interact with) GGCT
unspecified role	MI:0499	bait	MI:0496	EBI-21368476		false		unspecified role	MI:0499	prey	MI:0498		EBI-21364596	false	spoke expansion	Homo sapiens 293 cells transformed with SV40 large T antigen	9606	4035959	anti tag coimmunoprecipitation	MI:0007	0.35	sequence tag identification	MI:0102	31046837	association	MI:0914	LRRK2 (association) GGCT	false	association	LRRK2 (association) GGCT
unspecified role	MI:0499	bait	MI:0496	EBI-21368472|EBI-21368474		false		unspecified role	MI:0499	prey	MI:0498		EBI-21360986	true	spoke expansion	Homo sapiens 293 cells transformed with SV40 large T antigen	9606	4027300	anti tag coimmunoprecipitation	MI:0007	0.35	sequence tag identification	MI:0102	31046837	association	MI:0914	LRRK2 (association) GGCT	false	association	LRRK2 (association) GGCT
unspecified role	MI:0499	bait	MI:0496	EBI-21368476		false		unspecified role	MI:0499	prey	MI:0498		EBI-21364596	false	spoke expansion	Homo sapiens 293 cells transformed with SV40 large T antigen	9606	4037612	anti tag coimmunoprecipitation	MI:0007	0.35	sequence tag identification	MI:0102	31046837	association	MI:0914	LRRK2 (association) TARS1	false	association	LRRK2 (association) TARS1
unspecified role	MI:0499	bait	MI:0496	EBI-21368472|EBI-21368474		false		unspecified role	MI:0499	prey	MI:0498		EBI-21360986	true	spoke expansion	Homo sapiens 293 cells transformed with SV40 large T antigen	9606	4029301	anti tag coimmunoprecipitation	MI:0007	0.35	sequence tag identification	MI:0102	31046837	association	MI:0914	LRRK2 (association) TARS1	false	association	LRRK2 (association) TARS1
unspecified role	MI:0499	bait	MI:0496	EBI-21368476		false		unspecified role	MI:0499	prey	MI:0498		EBI-21364596	false	spoke expansion	Homo sapiens 293 cells transformed with SV40 large T antigen	9606	4037509	anti tag coimmunoprecipitation	MI:0007	0.35	sequence tag identification	MI:0102	31046837	association	MI:0914	LRRK2 (association) TXNDC17	false	association	LRRK2 (association) TXNDC17
unspecified role	MI:0499	bait	MI:0496	EBI-21368472|EBI-21368474		false		unspecified role	MI:0499	prey	MI:0498		EBI-21360986	true	spoke expansion	Homo sapiens 293 cells transformed with SV40 large T antigen	9606	4029130	anti tag coimmunoprecipitation	MI:0007	0.35	sequence tag identification	MI:0102	31046837	association	MI:0914	LRRK2 (association) TXNDC17	false	association	LRRK2 (association) TXNDC17
unspecified role	MI:0499	bait	MI:0496	EBI-21368476		false		unspecified role	MI:0499	prey	MI:0498		EBI-21364596	false	spoke expansion	Homo sapiens 293 cells transformed with SV40 large T antigen	9606	4035899	anti tag coimmunoprecipitation	MI:0007	0.35	sequence tag identification	MI:0102	31046837	association	MI:0914	LRRK2 (association) AASDHPPT	false	association	LRRK2 (association) AASDHPPT
unspecified role	MI:0499	bait	MI:0496	EBI-21368472|EBI-21368474		false		unspecified role	MI:0499	prey	MI:0498		EBI-21360986	true	spoke expansion	Homo sapiens 293 cells transformed with SV40 large T antigen	9606	4027197	anti tag coimmunoprecipitation	MI:0007	0.35	sequence tag identification	MI:0102	31046837	association	MI:0914	LRRK2 (association) AASDHPPT	false	association	LRRK2 (association) AASDHPPT
unspecified role	MI:0499	bait	MI:0496	EBI-21368476		false		unspecified role	MI:0499	prey	MI:0498		EBI-21364596	false	spoke expansion	Homo sapiens 293 cells transformed with SV40 large T antigen	9606	4035698	anti tag coimmunoprecipitation	MI:0007	0.35	sequence tag identification	MI:0102	31046837	association	MI:0914	LRRK2 (association) YARS2	false	association	LRRK2 (association) YARS2
unspecified role	MI:0499	bait	MI:0496	EBI-21368472|EBI-21368474		false		unspecified role	MI:0499	prey	MI:0498		EBI-21360986	true	spoke expansion	Homo sapiens 293 cells transformed with SV40 large T antigen	9606	4035131	anti tag coimmunoprecipitation	MI:0007	0.35	sequence tag identification	MI:0102	31046837	association	MI:0914	LRRK2 (association) YARS2	false	association	LRRK2 (association) YARS2
unspecified role	MI:0499	bait	MI:0496	EBI-21368476		false		unspecified role	MI:0499	prey	MI:0498		EBI-21364596	false	spoke expansion	Homo sapiens 293 cells transformed with SV40 large T antigen	9606	4040166	anti tag coimmunoprecipitation	MI:0007	0.35	sequence tag identification	MI:0102	31046837	association	MI:0914	LRRK2 (association) ME2	false	association	LRRK2 (association) ME2
unspecified role	MI:0499	bait	MI:0496	EBI-21368472|EBI-21368474		false		unspecified role	MI:0499	prey	MI:0498		EBI-21360986	true	spoke expansion	Homo sapiens 293 cells transformed with SV40 large T antigen	9606	4033960	anti tag coimmunoprecipitation	MI:0007	0.35	sequence tag identification	MI:0102	31046837	association	MI:0914	LRRK2 (association) ME2	false	association	LRRK2 (association) ME2
unspecified role	MI:0499	bait	MI:0496	EBI-21368476		false		unspecified role	MI:0499	prey	MI:0498		EBI-21364596	false	spoke expansion	Homo sapiens 293 cells transformed with SV40 large T antigen	9606	4037299	anti tag coimmunoprecipitation	MI:0007	0.35	sequence tag identification	MI:0102	31046837	association	MI:0914	LRRK2 (association) GCAT	false	association	LRRK2 (association) GCAT
unspecified role	MI:0499	bait	MI:0496	EBI-21368472|EBI-21368474		false		unspecified role	MI:0499	prey	MI:0498		EBI-21360986	true	spoke expansion	Homo sapiens 293 cells transformed with SV40 large T antigen	9606	4030732	anti tag coimmunoprecipitation	MI:0007	0.35	sequence tag identification	MI:0102	31046837	association	MI:0914	LRRK2 (association) GCAT	false	association	LRRK2 (association) GCAT
unspecified role	MI:0499	bait	MI:0496	EBI-21368476		false		unspecified role	MI:0499	prey	MI:0498		EBI-21364596	false	spoke expansion	Homo sapiens 293 cells transformed with SV40 large T antigen	9606	4035983	anti tag coimmunoprecipitation	MI:0007	0.35	sequence tag identification	MI:0102	31046837	association	MI:0914	LRRK2 (association) SRM	false	association	LRRK2 (association) SRM
unspecified role	MI:0499	bait	MI:0496	EBI-21368472|EBI-21368474		false		unspecified role	MI:0499	prey	MI:0498		EBI-21360986	true	spoke expansion	Homo sapiens 293 cells transformed with SV40 large T antigen	9606	4027336	anti tag coimmunoprecipitation	MI:0007	0.35	sequence tag identification	MI:0102	31046837	association	MI:0914	LRRK2 (association) SRM	false	association	LRRK2 (association) SRM
unspecified role	MI:0499	bait	MI:0496	EBI-21368476		false		unspecified role	MI:0499	prey	MI:0498		EBI-21364596	false	spoke expansion	Homo sapiens 293 cells transformed with SV40 large T antigen	9606	4038864	anti tag coimmunoprecipitation	MI:0007	0.35	sequence tag identification	MI:0102	31046837	association	MI:0914	LRRK2 (association) TARS2	false	association	LRRK2 (association) TARS2
unspecified role	MI:0499	bait	MI:0496	EBI-21368472|EBI-21368474		false		unspecified role	MI:0499	prey	MI:0498		EBI-21360986	true	spoke expansion	Homo sapiens 293 cells transformed with SV40 large T antigen	9606	4031934	anti tag coimmunoprecipitation	MI:0007	0.35	sequence tag identification	MI:0102	31046837	association	MI:0914	LRRK2 (association) TARS2	false	association	LRRK2 (association) TARS2
unspecified role	MI:0499	bait	MI:0496	EBI-21368476		false		unspecified role	MI:0499	prey	MI:0498		EBI-21364596	false	spoke expansion	Homo sapiens 293 cells transformed with SV40 large T antigen	9606	4039460	anti tag coimmunoprecipitation	MI:0007	0.35	sequence tag identification	MI:0102	31046837	association	MI:0914	LRRK2 (association) AK4	false	association	LRRK2 (association) AK4
unspecified role	MI:0499	bait	MI:0496	EBI-21368472|EBI-21368474		false		unspecified role	MI:0499	prey	MI:0498		EBI-21360986	true	spoke expansion	Homo sapiens 293 cells transformed with SV40 large T antigen	9606	4032867	anti tag coimmunoprecipitation	MI:0007	0.35	sequence tag identification	MI:0102	31046837	association	MI:0914	LRRK2 (association) AK4	false	association	LRRK2 (association) AK4
unspecified role	MI:0499	bait	MI:0496	EBI-21368476		false		unspecified role	MI:0499	prey	MI:0498		EBI-21364596	false	spoke expansion	Homo sapiens 293 cells transformed with SV40 large T antigen	9606	4039180	anti tag coimmunoprecipitation	MI:0007	0.35	sequence tag identification	MI:0102	31046837	association	MI:0914	LRRK2 (association) EARS2	false	association	LRRK2 (association) EARS2
unspecified role	MI:0499	bait	MI:0496	EBI-21368472|EBI-21368474		false		unspecified role	MI:0499	prey	MI:0498		EBI-21360986	true	spoke expansion	Homo sapiens 293 cells transformed with SV40 large T antigen	9606	4032431	anti tag coimmunoprecipitation	MI:0007	0.35	sequence tag identification	MI:0102	31046837	association	MI:0914	LRRK2 (association) EARS2	false	association	LRRK2 (association) EARS2
unspecified role	MI:0499	bait	MI:0496	EBI-21368476		false		unspecified role	MI:0499	prey	MI:0498		EBI-21364596	false	spoke expansion	Homo sapiens 293 cells transformed with SV40 large T antigen	9606	4039443	anti tag coimmunoprecipitation	MI:0007	0.35	sequence tag identification	MI:0102	31046837	association	MI:0914	LRRK2 (association) LARS2	false	association	LRRK2 (association) LARS2
unspecified role	MI:0499	bait	MI:0496	EBI-21368472|EBI-21368474		false		unspecified role	MI:0499	prey	MI:0498		EBI-21360986	true	spoke expansion	Homo sapiens 293 cells transformed with SV40 large T antigen	9606	4032840	anti tag coimmunoprecipitation	MI:0007	0.35	sequence tag identification	MI:0102	31046837	association	MI:0914	LRRK2 (association) LARS2	false	association	LRRK2 (association) LARS2
unspecified role	MI:0499	bait	MI:0496	EBI-21368472|EBI-21368474		false		unspecified role	MI:0499	prey	MI:0498		EBI-21360986	true	spoke expansion	Homo sapiens 293 cells transformed with SV40 large T antigen	9606	4027933	anti tag coimmunoprecipitation	MI:0007	0.35	sequence tag identification	MI:0102	31046837	association	MI:0914	LRRK2 (association) PGP	false	association	LRRK2 (association) PGP
unspecified role	MI:0499	bait	MI:0496	EBI-21368476		false		unspecified role	MI:0499	prey	MI:0498		EBI-21364596	false	spoke expansion	Homo sapiens 293 cells transformed with SV40 large T antigen	9606	4036378	anti tag coimmunoprecipitation	MI:0007	0.35	sequence tag identification	MI:0102	31046837	association	MI:0914	LRRK2 (association) PGP	false	association	LRRK2 (association) PGP
				EBI-21368476|EBI-21368474|EBI-21368472	2	true	23462|23464|11714|11716							false							0.35						LRRK2 (interact with) PGP	false		LRRK2 (interact with) PGP
				EBI-21368476|EBI-21368474|EBI-21368472	2	true	23438|23440|11738|11740							false							0.35						LRRK2 (interact with) GCAT	false		LRRK2 (interact with) GCAT
				EBI-21368476|EBI-21368474|EBI-21368472	2	true	23442|23444|11734|11736							false							0.35						LRRK2 (interact with) SRM	false		LRRK2 (interact with) SRM
				EBI-21368476|EBI-21368474|EBI-21368472	2	true	23450|23452|11726|11728							false							0.35						LRRK2 (interact with) AK4	false		LRRK2 (interact with) AK4
				EBI-21368476|EBI-21368474|EBI-21368472	2	true	23414|23416|11762|11764							false							0.35						LRRK2 (interact with) GGCT	false		LRRK2 (interact with) GGCT
				EBI-21368476|EBI-21368474|EBI-21368472	2	true	23446|23448|11730|11732							false							0.35						LRRK2 (interact with) TARS2	false		LRRK2 (interact with) TARS2
				EBI-21368476|EBI-21368474|EBI-21368472	2	true	23418|23420|11758|11760							false							0.35						LRRK2 (interact with) TARS1	false		LRRK2 (interact with) TARS1
				EBI-21368476|EBI-21368474|EBI-21368472	2	true	23458|23460|11718|11720							false							0.35						LRRK2 (interact with) LARS2	false		LRRK2 (interact with) LARS2
				EBI-21368476|EBI-21368474|EBI-21368472	2	true	23454|23456|11722|11724							false							0.35						LRRK2 (interact with) EARS2	false		LRRK2 (interact with) EARS2
				EBI-21368476|EBI-21368474|EBI-21368472	2	true	23422|23424|11754|11756							false							0.35						LRRK2 (interact with) TXNDC17	false		LRRK2 (interact with) TXNDC17
				EBI-21368476|EBI-21368474|EBI-21368472	2	true	23426|23428|11750|11752							false							0.35						LRRK2 (interact with) AASDHPPT	false		LRRK2 (interact with) AASDHPPT
				EBI-21368476|EBI-21368474|EBI-21368472	2	true	23430|23432|11746|11748							false							0.35						LRRK2 (interact with) YARS2	false		LRRK2 (interact with) YARS2
				EBI-21368476|EBI-21368474|EBI-21368472	2	true	23434|23436|11742|11744							false							0.35						LRRK2 (interact with) ME2	false		LRRK2 (interact with) ME2
unspecified role	MI:0499	bait	MI:0496	EBI-10049626|EBI-10049628		false		unspecified role	MI:0499	prey	MI:0498		EBI-10049589	false	spoke expansion	Homo sapiens	9606	52247	tandem affinity purification	MI:0676	0.35	sequence tag identification	MI:0102	23386615	association	MI:0914	STK4 (association) GGCT	false	association	STK4 (association) GGCT
				EBI-10049626|EBI-10049628	1	true	23492|11686							false							0.35						STK4 (interact with) GGCT	false		STK4 (interact with) GGCT
unspecified role	MI:0499	bait	MI:0496	EBI-11045213		false		unspecified role	MI:0499	prey	MI:0498		EBI-11044893	false	spoke expansion	Homo sapiens epitheloid cervix carcinoma cells	9606	862173	anti tag coimmunoprecipitation	MI:0007	0.35	sequence tag identification	MI:0102	26496610	association	MI:0914	TSNAX (association) GGCT	false	association	TSNAX (association) GGCT
unspecified role	MI:0499	bait	MI:0496	EBI-11045213		false		unspecified role	MI:0499	prey	MI:0498		EBI-11044893	false	spoke expansion	Homo sapiens epitheloid cervix carcinoma cells	9606	862233	anti tag coimmunoprecipitation	MI:0007	0.35	sequence tag identification	MI:0102	26496610	association	MI:0914	TSNAX (association) TXNL4A	false	association	TSNAX (association) TXNL4A
				EBI-11045213	1	true	23496|11682							false							0.35						TSNAX (interact with) GGCT	false		TSNAX (interact with) GGCT
				EBI-11045213	1	true	23498|11680							false							0.35						TSNAX (interact with) TXNL4A	false		TSNAX (interact with) TXNL4A
unspecified role	MI:0499	bait	MI:0496	EBI-11323052		false		unspecified role	MI:0499	prey	MI:0498		EBI-11322719	false	spoke expansion	Homo sapiens 293 cells transformed with SV40 large T antigen	9606	1050363	tandem affinity purification	MI:0676	0.35	Identification by mass spectrometry	MI:0427	25609649	association	MI:0914	NFKB1 (association) GGCT	false	association	NFKB1 (association) GGCT
				EBI-11323052	1	true	23504|11674							false							0.35						NFKB1 (interact with) GGCT	false		NFKB1 (interact with) GGCT
unspecified role	MI:0499	prey	MI:0498	EBI-24889526		false		unspecified role	MI:0499	bait	MI:0496	EBI-24889519	EBI-24889511	false		Saccharomyces cerevisiae (Baker's yeast)	4932	6882248	two hybrid prey pooling approach	MI:1112	0.56	nucleotide sequence identification	MI:0078	32296183	physical association	MI:0915	TARS3 (physical association) TARS2	false	physical association	TARS3 (physical association) TARS2
unspecified role	MI:0499	prey	MI:0498	EBI-24884505		false		unspecified role	MI:0499	bait	MI:0496	EBI-24884498	EBI-24884490	false		Saccharomyces cerevisiae (Baker's yeast)	4932	6877443	two hybrid prey pooling approach	MI:1112	0.56	nucleotide sequence identification	MI:0078	32296183	physical association	MI:0915	TARS3 (physical association) LGALS14	false	physical association	TARS3 (physical association) LGALS14
unspecified role	MI:0499	prey	MI:0498	EBI-23022332		false		unspecified role	MI:0499	bait	MI:0496	EBI-23022325	EBI-23022317	false		Saccharomyces cerevisiae (Baker's yeast)	4932	5293881	two hybrid array	MI:0397	0.56	nucleotide sequence identification	MI:0078	32296183	physical association	MI:0915	TARS3 (physical association) TARS2	false	physical association	TARS3 (physical association) TARS2
unspecified role	MI:0499	prey	MI:0498	EBI-23017347		false		unspecified role	MI:0499	bait	MI:0496	EBI-23017340	EBI-23017332	false		Saccharomyces cerevisiae (Baker's yeast)	4932	5288864	two hybrid array	MI:0397	0.56	nucleotide sequence identification	MI:0078	32296183	physical association	MI:0915	TARS3 (physical association) LGALS14	false	physical association	TARS3 (physical association) LGALS14
unspecified role	MI:0499	prey	MI:0498	EBI-22880319		false		unspecified role	MI:0499	bait	MI:0496	EBI-22880312	EBI-22880304	false		Saccharomyces cerevisiae (Baker's yeast)	4932	5143116	two hybrid array	MI:0397	0.56	nucleotide sequence identification	MI:0078	32296183	physical association	MI:0915	TARS3 (physical association) ARPC3	false	physical association	TARS3 (physical association) ARPC3
unspecified role	MI:0499	prey	MI:0498	EBI-22863367		false		unspecified role	MI:0499	bait	MI:0496	EBI-22863360	EBI-22863352	false		Saccharomyces cerevisiae (Baker's yeast)	4932	5126783	two hybrid array	MI:0397	0.72	nucleotide sequence identification	MI:0078	32296183	physical association	MI:0915	TARS3 (physical association) TARS1	false	physical association	TARS3 (physical association) TARS1
unspecified role	MI:0499	prey	MI:0498	EBI-22423175		false		unspecified role	MI:0499	bait	MI:0496	EBI-22423168	EBI-22423160	false		Saccharomyces cerevisiae (Baker's yeast)	4932	4839362	two hybrid prey pooling approach	MI:1112	0.56	nucleotide sequence identification	MI:0078	32296183	physical association	MI:0915	TARS3 (physical association) ARPC3	false	physical association	TARS3 (physical association) ARPC3
unspecified role	MI:0499	prey	MI:0498	EBI-22405999		false		unspecified role	MI:0499	bait	MI:0496	EBI-22405992	EBI-22405984	false		Saccharomyces cerevisiae (Baker's yeast)	4932	4821457	two hybrid prey pooling approach	MI:1112	0.72	nucleotide sequence identification	MI:0078	32296183	physical association	MI:0915	TARS3 (physical association) TARS1	false	physical association	TARS3 (physical association) TARS1
unspecified role	MI:0499	prey	MI:0498	EBI-22401413		false		unspecified role	MI:0499	bait	MI:0496	EBI-22401406	EBI-22401398	false		Saccharomyces cerevisiae (Baker's yeast)	4932	4816710	two hybrid prey pooling approach	MI:1112	0.56	nucleotide sequence identification	MI:0078	32296183	physical association	MI:0915	TARS3 (physical association) ECSIT	false	physical association	TARS3 (physical association) ECSIT
unspecified role	MI:0499	prey	MI:0498			false		unspecified role	MI:0499	bait	MI:0496		EBI-1085302	false		Homo sapiens transformed primary embryonal kidney cells	9606	718084	anti bait coimmunoprecipitation	MI:0006	0.4	sequence tag identification	MI:0102	17353931	physical association	MI:0915	TARS3 (physical association) PRKAB1	false	physical association	TARS3 (physical association) PRKAB1
unspecified role	MI:0499	prey	MI:0498			false		unspecified role	MI:0499	bait	MI:0496		EBI-1076341	false		Homo sapiens transformed primary embryonal kidney cells	9606	668696	anti bait coimmunoprecipitation	MI:0006	0.4	sequence tag identification	MI:0102	17353931	physical association	MI:0915	TARS3 (physical association) TRAF6	false	physical association	TARS3 (physical association) TRAF6
unspecified role	MI:0499	bait	MI:0496			false		unspecified role	MI:0499	prey	MI:0498		EBI-10331951	false		Saccharomyces cerevisiae (Baker's yeast)	4932	358977	two hybrid array	MI:0397	0.72	nucleotide sequence identification	MI:0078	25416956	physical association	MI:0915	TARS3 (physical association) TARS1	false	physical association	TARS3 (physical association) TARS1
unspecified role	MI:0499	bait	MI:0496			false		unspecified role	MI:0499	prey	MI:0498		EBI-10173107	false		Saccharomyces cerevisiae (Baker's yeast)	4932	134297	two hybrid prey pooling approach	MI:1112	0.56	nucleotide sequence identification	MI:0078	25416956	physical association	MI:0915	TARS3 (physical association) b2rdx5_human	false	physical association	TARS3 (physical association) b2rdx5_human
unspecified role	MI:0499	bait	MI:0496			false		unspecified role	MI:0499	prey	MI:0498		EBI-10173117	false		Saccharomyces cerevisiae (Baker's yeast)	4932	134329	two hybrid prey pooling approach	MI:1112	0.72	nucleotide sequence identification	MI:0078	25416956	physical association	MI:0915	TARS3 (physical association) TARS1	false	physical association	TARS3 (physical association) TARS1
unspecified role	MI:0499	bait	MI:0496			false		unspecified role	MI:0499	prey	MI:0498		EBI-10331941	false		Saccharomyces cerevisiae (Baker's yeast)	4932	358971	two hybrid array	MI:0397	0.56	nucleotide sequence identification	MI:0078	25416956	physical association	MI:0915	TARS3 (physical association) b2rdx5_human	false	physical association	TARS3 (physical association) b2rdx5_human
				EBI-24889526|EBI-23022332	3	true	23508|23550|23512|11628|11666|11670					EBI-23022325|EBI-24889519		false							0.56						TARS3 (interact with) TARS2	false		TARS3 (interact with) TARS2
				EBI-24884505|EBI-23017347	3	true	23510|23582|23514|11596|11664|11668					EBI-23017340|EBI-24884498		false							0.56						TARS3 (interact with) LGALS14	false		TARS3 (interact with) LGALS14
					1	true	23526|11652							false							0.4						TARS3 (interact with) PRKAB1	false		TARS3 (interact with) PRKAB1
					1	true	23528|11650							false							0.4						TARS3 (interact with) TRAF6	false		TARS3 (interact with) TRAF6
unspecified role	MI:0499	bait	MI:0496	EBI-28944363|EBI-28944365		false		unspecified role	MI:0499	prey	MI:0498		EBI-28944360	false	spoke expansion	human-Flp-In T-REx 293	9606	8713415	pull down	MI:0096	0.35	sequence tag identification	MI:0102	32707033	association	MI:0914	AURKB (association) TARS3	false	association	AURKB (association) TARS3
				EBI-28944365|EBI-28944363	1	true	23546|11632							false							0.35						AURKB (interact with) TARS3	false		AURKB (interact with) TARS3
unspecified role	MI:0499	neutral component	MI:0497			false		unspecified role	MI:0499	neutral component	MI:0497		EBI-24414295	false		Saccharomyces cerevisiae (Baker's yeast)	4932	6538925	validated two hybrid	MI:1356	0.56	nucleotide sequence identification	MI:0078	32296183	physical association	MI:0915	TARS2 (physical association) TARS3	false	physical association	TARS2 (physical association) TARS3
unspecified role	MI:0499	prey	MI:0498	EBI-25589997		false		unspecified role	MI:0499	bait	MI:0496		EBI-25507458	false		Saccharomyces cerevisiae	559292	7377314	two hybrid	MI:0018	0.37	nucleotide sequence identification	MI:0078	25732088	physical association	MI:0915	TARS2 (physical association) rep	false	physical association	TARS2 (physical association) rep
unspecified role	MI:0499	neutral component	MI:0497			false		unspecified role	MI:0499	neutral component	MI:0497		EBI-24796663	false		Saccharomyces cerevisiae (Baker's yeast)	4932	6793821	validated two hybrid	MI:1356	0.56	nucleotide sequence identification	MI:0078	32296183	physical association	MI:0915	TARS2 (physical association) SYPL1	false	physical association	TARS2 (physical association) SYPL1
unspecified role	MI:0499	neutral component	MI:0497			false		unspecified role	MI:0499	neutral component	MI:0497		EBI-24624430	false		Saccharomyces cerevisiae (Baker's yeast)	4932	6675401	validated two hybrid	MI:1356	0.56	nucleotide sequence identification	MI:0078	32296183	physical association	MI:0915	TARS2 (physical association) PLIN3	false	physical association	TARS2 (physical association) PLIN3
unspecified role	MI:0499	neutral component	MI:0497			false		unspecified role	MI:0499	neutral component	MI:0497		EBI-24506146	false		Saccharomyces cerevisiae (Baker's yeast)	4932	6598223	validated two hybrid	MI:1356	0.56	nucleotide sequence identification	MI:0078	32296183	physical association	MI:0915	TARS2 (physical association) ARL6IP1	false	physical association	TARS2 (physical association) ARL6IP1
unspecified role	MI:0499	neutral component	MI:0497			false		unspecified role	MI:0499	neutral component	MI:0497		EBI-24407676	false		Saccharomyces cerevisiae (Baker's yeast)	4932	6534626	validated two hybrid	MI:1356	0.56	nucleotide sequence identification	MI:0078	32296183	physical association	MI:0915	TARS2 (physical association) ccsb orf id: 54692	false	physical association	TARS2 (physical association) ccsb orf id: 54692
unspecified role	MI:0499	neutral component	MI:0497			false		unspecified role	MI:0499	neutral component	MI:0497		EBI-24268316	false		Saccharomyces cerevisiae (Baker's yeast)	4932	6433366	validated two hybrid	MI:1356	0.56	nucleotide sequence identification	MI:0078	32296183	physical association	MI:0915	TARS2 (physical association) DDIT4L	false	physical association	TARS2 (physical association) DDIT4L
unspecified role	MI:0499	neutral component	MI:0497			false		unspecified role	MI:0499	neutral component	MI:0497		EBI-24268294	false		Saccharomyces cerevisiae (Baker's yeast)	4932	6433354	validated two hybrid	MI:1356	0.56	nucleotide sequence identification	MI:0078	32296183	physical association	MI:0915	TARS2 (physical association) SFT2D1	false	physical association	TARS2 (physical association) SFT2D1
unspecified role	MI:0499	neutral component	MI:0497			false		unspecified role	MI:0499	neutral component	MI:0497		EBI-24264392	false		Saccharomyces cerevisiae (Baker's yeast)	4932	6430189	validated two hybrid	MI:1356	0.56	nucleotide sequence identification	MI:0078	32296183	physical association	MI:0915	TARS2 (physical association) MAL2	false	physical association	TARS2 (physical association) MAL2
				EBI-25589997	1	true	23552|11626							false							0.37						TARS2 (interact with) rep	false		TARS2 (interact with) rep
				EBI-23904728|EBI-24196030	3	true	23554|29812|29814|11624|5364|5366					EBI-24196037|EBI-23904735		false							0.56						TARS2 (interact with) SYPL1	false		TARS2 (interact with) SYPL1
				EBI-23383912|EBI-23608289	3	true	23556|29824|29826|11622|5352|5354					EBI-23383919|EBI-23608296		false							0.56						TARS2 (interact with) PLIN3	false		TARS2 (interact with) PLIN3
				EBI-23173878|EBI-22724399	3	true	23558|29836|29838|11620|5340|5342					EBI-22724406|EBI-23173885		false							0.56						TARS2 (interact with) ARL6IP1	false		TARS2 (interact with) ARL6IP1
				EBI-22761033|EBI-22752477	3	true	23564|29840|29842|11614|5336|5338					EBI-22752484|EBI-22761040		false							0.56						TARS2 (interact with) SFT2D1	false		TARS2 (interact with) SFT2D1
				EBI-22741855|EBI-22733886	3	true	23566|29844|29846|11612|5332|5334					EBI-22741862|EBI-22733893		false							0.56						TARS2 (interact with) MAL2	false		TARS2 (interact with) MAL2
				EBI-22761068|EBI-22752512	3	true	23562|27376|27378|11616|7800|7802					EBI-22761075|EBI-22752519		false							0.56						TARS2 (interact with) DDIT4L	false		TARS2 (interact with) DDIT4L
unspecified role	MI:0499	neutral component	MI:0497			false		unspecified role	MI:0499	neutral component	MI:0497		EBI-24411203	false		Saccharomyces cerevisiae (Baker's yeast)	4932	6536921	validated two hybrid	MI:1356	0.56	nucleotide sequence identification	MI:0078	32296183	physical association	MI:0915	LGALS14 (physical association) TARS3	false	physical association	LGALS14 (physical association) TARS3
unspecified role	MI:0499	neutral component	MI:0497			false		unspecified role	MI:0499	neutral component	MI:0497		EBI-24342041	false		Saccharomyces cerevisiae (Baker's yeast)	4932	6487927	validated two hybrid	MI:1356	0.56	nucleotide sequence identification	MI:0078	32296183	physical association	MI:0915	ARPC3 (physical association) TARS3	false	physical association	ARPC3 (physical association) TARS3
				EBI-22880312|EBI-22423168	3	true	23584|23516|23520|11594|11658|11662					EBI-22880319|EBI-22423175		false							0.56						ARPC3 (interact with) TARS3	false		ARPC3 (interact with) TARS3
unspecified role	MI:0499	neutral component	MI:0497			false		unspecified role	MI:0499	neutral component	MI:0497		EBI-24331529	false		Saccharomyces cerevisiae (Baker's yeast)	4932	6480824	validated two hybrid	MI:1356	0.72	nucleotide sequence identification	MI:0078	32296183	physical association	MI:0915	TARS1 (physical association) TARS3	false	physical association	TARS1 (physical association) TARS3
unspecified role	MI:0499	neutral component	MI:0497			false		unspecified role	MI:0499	neutral component	MI:0497		EBI-10494510	false		Saccharomyces cerevisiae (Baker's yeast)	4932	487435	validated two hybrid	MI:1356	0.72	nucleotide sequence identification	MI:0078	25416956	physical association	MI:0915	TARS1 (physical association) TARS3	false	physical association	TARS1 (physical association) TARS3
unspecified role	MI:0499	prey	MI:0498	EBI-6871709		false		unspecified role	MI:0499	bait	MI:0496	EBI-6871707	EBI-6871698	false		Saccharomyces cerevisiae (Baker's yeast)	4932	10065272	reverse ras recruitment system	MI:0097	0.37	nucleotide sequence identification	MI:0078	25277244	physical association	MI:0915	TARS1 (physical association) HSPB1	false	physical association	TARS1 (physical association) HSPB1
unspecified role	MI:0499	prey	MI:0498			false		unspecified role	MI:0499	bait	MI:0496		EBI-1190883	false		Human caucasian prostate carcinoma	9606	1455597	anti bait coimmunoprecipitation	MI:0006	0.4	Identification by mass spectrometry	MI:0427	17220478	physical association	MI:0915	TARS1 (physical association) NDRG1	false	physical association	TARS1 (physical association) NDRG1
unspecified role	MI:0499	prey	MI:0498			false		unspecified role	MI:0499	bait	MI:0496		EBI-1085502	false		Homo sapiens transformed primary embryonal kidney cells	9606	718523	anti bait coimmunoprecipitation	MI:0006	0.4	sequence tag identification	MI:0102	17353931	physical association	MI:0915	TARS1 (physical association) IKBKE	false	physical association	TARS1 (physical association) IKBKE
unspecified role	MI:0499	prey	MI:0498			false		unspecified role	MI:0499	bait	MI:0496		EBI-1081373	false		Homo sapiens transformed primary embryonal kidney cells	9606	689412	anti bait coimmunoprecipitation	MI:0006	0.4	sequence tag identification	MI:0102	17353931	physical association	MI:0915	TARS1 (physical association) BCAR3	false	physical association	TARS1 (physical association) BCAR3
unspecified role	MI:0499	prey	MI:0498			false		unspecified role	MI:0499	bait	MI:0496		EBI-1079325	false		Homo sapiens transformed primary embryonal kidney cells	9606	685062	anti bait coimmunoprecipitation	MI:0006	0.4	sequence tag identification	MI:0102	17353931	physical association	MI:0915	TARS1 (physical association) HLA-B	false	physical association	TARS1 (physical association) HLA-B
unspecified role	MI:0499	prey	MI:0498			false		unspecified role	MI:0499	bait	MI:0496		EBI-1077495	false		Homo sapiens transformed primary embryonal kidney cells	9606	681221	anti bait coimmunoprecipitation	MI:0006	0.4	sequence tag identification	MI:0102	17353931	physical association	MI:0915	TARS1 (physical association) PRKAB1	false	physical association	TARS1 (physical association) PRKAB1
unspecified role	MI:0499	prey	MI:0498			false		unspecified role	MI:0499	bait	MI:0496		EBI-1072400	false		Homo sapiens transformed primary embryonal kidney cells	9606	650673	anti bait coimmunoprecipitation	MI:0006	0.4	sequence tag identification	MI:0102	17353931	physical association	MI:0915	TARS1 (physical association) VHL	false	physical association	TARS1 (physical association) VHL
unspecified role	MI:0499	prey	MI:0498			false		unspecified role	MI:0499	bait	MI:0496		EBI-1070533	false		Homo sapiens transformed primary embryonal kidney cells	9606	636823	anti bait coimmunoprecipitation	MI:0006	0.4	sequence tag identification	MI:0102	17353931	physical association	MI:0915	TARS1 (physical association) ELF3	false	physical association	TARS1 (physical association) ELF3
unspecified role	MI:0499	prey	MI:0498			false		unspecified role	MI:0499	bait	MI:0496		EBI-1065958	false		Homo sapiens transformed primary embryonal kidney cells	9606	597800	anti bait coimmunoprecipitation	MI:0006	0.4	sequence tag identification	MI:0102	17353931	physical association	MI:0915	TARS1 (physical association) MCC	false	physical association	TARS1 (physical association) MCC
unspecified role	MI:0499	prey	MI:0498			false		unspecified role	MI:0499	bait	MI:0496		EBI-1063970	false		Homo sapiens transformed primary embryonal kidney cells	9606	591864	anti bait coimmunoprecipitation	MI:0006	0.4	sequence tag identification	MI:0102	17353931	physical association	MI:0915	TARS1 (physical association) ARF6	false	physical association	TARS1 (physical association) ARF6
unspecified role	MI:0499	prey	MI:0498			false		unspecified role	MI:0499	bait	MI:0496		EBI-1060743	false		Homo sapiens transformed primary embryonal kidney cells	9606	559696	anti bait coimmunoprecipitation	MI:0006	0.4	sequence tag identification	MI:0102	17353931	physical association	MI:0915	TARS1 (physical association) TRAF6	false	physical association	TARS1 (physical association) TRAF6
				EBI-22405992|EBI-22863360	6	true	23588|23518|23522|23590|23530|23534|11588|11590|11644|11648|11656|11660					EBI-22863367|EBI-22405999		false							0.72						TARS1 (interact with) TARS3	false		TARS1 (interact with) TARS3
					1	true	23602|11576							false							0.4						TARS1 (interact with) PRKAB1	false		TARS1 (interact with) PRKAB1
					1	true	23612|11566							false							0.4						TARS1 (interact with) TRAF6	false		TARS1 (interact with) TRAF6
				EBI-6871709	1	true	23592|11586					EBI-6871707		false							0.37						TARS1 (interact with) HSPB1	false		TARS1 (interact with) HSPB1
					1	true	23594|11584							false							0.4						TARS1 (interact with) NDRG1	false		TARS1 (interact with) NDRG1
					1	true	23596|11582							false							0.4						TARS1 (interact with) IKBKE	false		TARS1 (interact with) IKBKE
					1	true	23598|11580							false							0.4						TARS1 (interact with) BCAR3	false		TARS1 (interact with) BCAR3
					1	true	23600|11578							false							0.4						TARS1 (interact with) HLA-B	false		TARS1 (interact with) HLA-B
					1	true	23604|11574							false							0.4						TARS1 (interact with) VHL	false		TARS1 (interact with) VHL
					1	true	23606|11572							false							0.4						TARS1 (interact with) ELF3	false		TARS1 (interact with) ELF3
					1	true	23608|11570							false							0.4						TARS1 (interact with) MCC	false		TARS1 (interact with) MCC
					1	true	23610|11568							false							0.4						TARS1 (interact with) ARF6	false		TARS1 (interact with) ARF6
unspecified role	MI:0499	neutral component	MI:0497			false		unspecified role	MI:0499	neutral component	MI:0497		EBI-24328761	false		Saccharomyces cerevisiae (Baker's yeast)	4932	6478929	validated two hybrid	MI:1356	0.56	nucleotide sequence identification	MI:0078	32296183	physical association	MI:0915	ECSIT (physical association) TARS3	false	physical association	ECSIT (physical association) TARS3
unspecified role	MI:0499	bait	MI:0496	EBI-22858902		false		unspecified role	MI:0499	prey	MI:0498	EBI-22858909	EBI-22858894	false		Saccharomyces cerevisiae (Baker's yeast)	4932	5122507	two hybrid array	MI:0397	0.56	nucleotide sequence identification	MI:0078	32296183	physical association	MI:0915	ECSIT (physical association) TARS3	false	physical association	ECSIT (physical association) TARS3
unspecified role	MI:0499	bait	MI:0496	EBI-10761701		false		unspecified role	MI:0499	prey	MI:0498		EBI-10761679	false	spoke expansion	Human colon carcinoma HCT116 cells	9606	665037	anti tag coimmunoprecipitation	MI:0007	0.35	Identification by mass spectrometry	MI:0427	24344204	association	MI:0914	ECSIT (association) GCAT	false	association	ECSIT (association) GCAT
				EBI-10761701	1	true	23642|11536							false							0.35						ECSIT (interact with) GCAT	false		ECSIT (interact with) GCAT
				EBI-22858902|EBI-22401406	3	true	23638|23640|23524|11538|11540|11654					EBI-22401413|EBI-22858909		false							0.56						ECSIT (interact with) TARS3	false		ECSIT (interact with) TARS3
unspecified role	MI:0499	neutral component	MI:0497			false		unspecified role	MI:0499	neutral component	MI:0497		EBI-24315162	false		Saccharomyces cerevisiae (Baker's yeast)	4932	6468887	validated two hybrid	MI:1356	0.56	nucleotide sequence identification	MI:0078	32296183	physical association	MI:0915	ATF4 (physical association) TARS3	false	physical association	ATF4 (physical association) TARS3
unspecified role	MI:0499	prey	MI:0498	EBI-22836924		false		unspecified role	MI:0499	bait	MI:0496	EBI-22836917	EBI-22836909	false		Saccharomyces cerevisiae (Baker's yeast)	4932	5101351	two hybrid array	MI:0397	0.56	nucleotide sequence identification	MI:0078	32296183	physical association	MI:0915	ATF4 (physical association) TARS3	false	physical association	ATF4 (physical association) TARS3
unspecified role	MI:0499	prey	MI:0498	EBI-22379274		false		unspecified role	MI:0499	bait	MI:0496	EBI-22379267	EBI-22379259	false		Saccharomyces cerevisiae (Baker's yeast)	4932	4793121	two hybrid prey pooling approach	MI:1112	0.56	nucleotide sequence identification	MI:0078	32296183	physical association	MI:0915	ATF4 (physical association) TARS3	false	physical association	ATF4 (physical association) TARS3
unspecified role	MI:0499	unspecified role	MI:0499			false		unspecified role	MI:0499	unspecified role	MI:0499		EBI-3905368	false		Saccharomyces cerevisiae (Baker's yeast)	4932	9288568	two hybrid array	MI:0397	0.37	predetermined participant	MI:0396	21988832	physical association	MI:0915	ATF4 (physical association) HK3	false	physical association	ATF4 (physical association) HK3
				EBI-22379274|EBI-22836924	3	true	23648|23650|23652|11526|11528|11530					EBI-22379267|EBI-22836917		false							0.56						ATF4 (interact with) TARS3	false		ATF4 (interact with) TARS3
					1	true	23654|11524							false							0.37						ATF4 (interact with) HK3	false		ATF4 (interact with) HK3
unspecified role	MI:0499	neutral component	MI:0497			false		unspecified role	MI:0499	neutral component	MI:0497		EBI-24265569	false		Saccharomyces cerevisiae (Baker's yeast)	4932	6431169	validated two hybrid	MI:1356	0.56	nucleotide sequence identification	MI:0078	32296183	physical association	MI:0915	TP53BP2 (physical association) TARS3	false	physical association	TP53BP2 (physical association) TARS3
unspecified role	MI:0499	prey	MI:0498	EBI-22743678		false		unspecified role	MI:0499	bait	MI:0496	EBI-22743671	EBI-22743664	false		Saccharomyces cerevisiae (Baker's yeast)	4932	5010346	two hybrid array	MI:0397	0.56	nucleotide sequence identification	MI:0078	32296183	physical association	MI:0915	TP53BP2 (physical association) TARS3	false	physical association	TP53BP2 (physical association) TARS3
unspecified role	MI:0499	prey	MI:0498	EBI-22734920		false		unspecified role	MI:0499	bait	MI:0496	EBI-22734913	EBI-22734906	false		Saccharomyces cerevisiae (Baker's yeast)	4932	5001455	two hybrid prey pooling approach	MI:1112	0.56	nucleotide sequence identification	MI:0078	32296183	physical association	MI:0915	TP53BP2 (physical association) TARS3	false	physical association	TP53BP2 (physical association) TARS3
				EBI-22743678|EBI-22734920	3	true	23660|23662|23664|11514|11516|11518					EBI-22734913|EBI-22743671		false							0.56						TP53BP2 (interact with) TARS3	false		TP53BP2 (interact with) TARS3
unspecified role	MI:0499	bait	MI:0496			false		unspecified role	MI:0499	prey	MI:0498		EBI-13943458	false	spoke expansion	Homo sapiens transformed primary embryonal kidney cells	9606	1937735	anti bait coimmunoprecipitation	MI:0006	0.35	sequence tag identification	MI:0102	28380382	association	MI:0914	HSCB (association) TARS3	false	association	HSCB (association) TARS3
unspecified role	MI:0499	bait	MI:0496			false		unspecified role	MI:0499	prey	MI:0498		EBI-13943458	false	spoke expansion	Homo sapiens transformed primary embryonal kidney cells	9606	1937731	anti bait coimmunoprecipitation	MI:0006	0.35	sequence tag identification	MI:0102	28380382	association	MI:0914	HSCB (association) ALAS1	false	association	HSCB (association) ALAS1
unspecified role	MI:0499	bait	MI:0496			false		unspecified role	MI:0499	prey	MI:0498		EBI-13943458	false	spoke expansion	Homo sapiens transformed primary embryonal kidney cells	9606	1935616	anti bait coimmunoprecipitation	MI:0006	0.35	sequence tag identification	MI:0102	28380382	association	MI:0914	HSCB (association) GATC	false	association	HSCB (association) GATC
unspecified role	MI:0499	bait	MI:0496			false		unspecified role	MI:0499	prey	MI:0498		EBI-13943458	false	spoke expansion	Homo sapiens transformed primary embryonal kidney cells	9606	1937759	anti bait coimmunoprecipitation	MI:0006	0.35	sequence tag identification	MI:0102	28380382	association	MI:0914	HSCB (association) FARS2	false	association	HSCB (association) FARS2
unspecified role	MI:0499	bait	MI:0496			false		unspecified role	MI:0499	prey	MI:0498		EBI-13943458	false	spoke expansion	Homo sapiens transformed primary embryonal kidney cells	9606	1936369	anti bait coimmunoprecipitation	MI:0006	0.35	sequence tag identification	MI:0102	28380382	association	MI:0914	HSCB (association) AASDHPPT	false	association	HSCB (association) AASDHPPT
unspecified role	MI:0499	bait	MI:0496			false		unspecified role	MI:0499	prey	MI:0498		EBI-13943458	false	spoke expansion	Homo sapiens transformed primary embryonal kidney cells	9606	1937822	anti bait coimmunoprecipitation	MI:0006	0.35	sequence tag identification	MI:0102	28380382	association	MI:0914	HSCB (association) YARS2	false	association	HSCB (association) YARS2
unspecified role	MI:0499	bait	MI:0496			false		unspecified role	MI:0499	prey	MI:0498		EBI-13943458	false	spoke expansion	Homo sapiens transformed primary embryonal kidney cells	9606	1936896	anti bait coimmunoprecipitation	MI:0006	0.35	sequence tag identification	MI:0102	28380382	association	MI:0914	HSCB (association) ME2	false	association	HSCB (association) ME2
unspecified role	MI:0499	bait	MI:0496			false		unspecified role	MI:0499	prey	MI:0498		EBI-13943458	false	spoke expansion	Homo sapiens transformed primary embryonal kidney cells	9606	1937788	anti bait coimmunoprecipitation	MI:0006	0.35	sequence tag identification	MI:0102	28380382	association	MI:0914	HSCB (association) SARS2	false	association	HSCB (association) SARS2
unspecified role	MI:0499	bait	MI:0496			false		unspecified role	MI:0499	prey	MI:0498		EBI-13943458	false	spoke expansion	Homo sapiens transformed primary embryonal kidney cells	9606	1937611	anti bait coimmunoprecipitation	MI:0006	0.35	sequence tag identification	MI:0102	28380382	association	MI:0914	HSCB (association) GCAT	false	association	HSCB (association) GCAT
unspecified role	MI:0499	bait	MI:0496			false		unspecified role	MI:0499	prey	MI:0498		EBI-13943458	false	spoke expansion	Homo sapiens transformed primary embryonal kidney cells	9606	1937817	anti bait coimmunoprecipitation	MI:0006	0.35	sequence tag identification	MI:0102	28380382	association	MI:0914	HSCB (association) TARS2	false	association	HSCB (association) TARS2
unspecified role	MI:0499	bait	MI:0496			false		unspecified role	MI:0499	prey	MI:0498		EBI-13943458	false	spoke expansion	Homo sapiens transformed primary embryonal kidney cells	9606	1937791	anti bait coimmunoprecipitation	MI:0006	0.35	sequence tag identification	MI:0102	28380382	association	MI:0914	HSCB (association) PARS2	false	association	HSCB (association) PARS2
unspecified role	MI:0499	bait	MI:0496			false		unspecified role	MI:0499	prey	MI:0498		EBI-13943458	false	spoke expansion	Homo sapiens transformed primary embryonal kidney cells	9606	1937002	anti bait coimmunoprecipitation	MI:0006	0.35	sequence tag identification	MI:0102	28380382	association	MI:0914	HSCB (association) GLDC	false	association	HSCB (association) GLDC
unspecified role	MI:0499	bait	MI:0496			false		unspecified role	MI:0499	prey	MI:0498		EBI-13943458	false	spoke expansion	Homo sapiens transformed primary embryonal kidney cells	9606	1936467	anti bait coimmunoprecipitation	MI:0006	0.35	sequence tag identification	MI:0102	28380382	association	MI:0914	HSCB (association) HKDC1	false	association	HSCB (association) HKDC1
unspecified role	MI:0499	bait	MI:0496			false		unspecified role	MI:0499	prey	MI:0498		EBI-13943458	false	spoke expansion	Homo sapiens transformed primary embryonal kidney cells	9606	1937295	anti bait coimmunoprecipitation	MI:0006	0.35	sequence tag identification	MI:0102	28380382	association	MI:0914	HSCB (association) PDHA2	false	association	HSCB (association) PDHA2
unspecified role	MI:0499	bait	MI:0496			false		unspecified role	MI:0499	prey	MI:0498		EBI-13943458	false	spoke expansion	Homo sapiens transformed primary embryonal kidney cells	9606	1937757	anti bait coimmunoprecipitation	MI:0006	0.35	sequence tag identification	MI:0102	28380382	association	MI:0914	HSCB (association) MARS2	false	association	HSCB (association) MARS2
unspecified role	MI:0499	bait	MI:0496			false		unspecified role	MI:0499	prey	MI:0498		EBI-13943458	false	spoke expansion	Homo sapiens transformed primary embryonal kidney cells	9606	1937782	anti bait coimmunoprecipitation	MI:0006	0.35	sequence tag identification	MI:0102	28380382	association	MI:0914	HSCB (association) EARS2	false	association	HSCB (association) EARS2
unspecified role	MI:0499	bait	MI:0496			false		unspecified role	MI:0499	prey	MI:0498		EBI-13943458	false	spoke expansion	Homo sapiens transformed primary embryonal kidney cells	9606	1937810	anti bait coimmunoprecipitation	MI:0006	0.35	sequence tag identification	MI:0102	28380382	association	MI:0914	HSCB (association) LARS2	false	association	HSCB (association) LARS2
					1	true	23674|11504							false							0.35						HSCB (interact with) FARS2	false		HSCB (interact with) FARS2
					1	true	23682|11496							false							0.35						HSCB (interact with) SARS2	false		HSCB (interact with) SARS2
					1	true	23684|11494							false							0.35						HSCB (interact with) GCAT	false		HSCB (interact with) GCAT
					1	true	23668|11510							false							0.35						HSCB (interact with) TARS3	false		HSCB (interact with) TARS3
					1	true	23686|11492							false							0.35						HSCB (interact with) TARS2	false		HSCB (interact with) TARS2
					1	true	23692|11486							false							0.35						HSCB (interact with) HKDC1	false		HSCB (interact with) HKDC1
					1	true	23688|11490							false							0.35						HSCB (interact with) PARS2	false		HSCB (interact with) PARS2
					1	true	23690|11488							false							0.35						HSCB (interact with) GLDC	false		HSCB (interact with) GLDC
					1	true	23700|11478							false							0.35						HSCB (interact with) LARS2	false		HSCB (interact with) LARS2
					1	true	23694|11484							false							0.35						HSCB (interact with) PDHA2	false		HSCB (interact with) PDHA2
					1	true	23696|11482							false							0.35						HSCB (interact with) MARS2	false		HSCB (interact with) MARS2
					1	true	23698|11480							false							0.35						HSCB (interact with) EARS2	false		HSCB (interact with) EARS2
					1	true	23670|11508							false							0.35						HSCB (interact with) ALAS1	false		HSCB (interact with) ALAS1
					1	true	23676|11502							false							0.35						HSCB (interact with) AASDHPPT	false		HSCB (interact with) AASDHPPT
					1	true	23678|11500							false							0.35						HSCB (interact with) YARS2	false		HSCB (interact with) YARS2
					1	true	23672|11506							false							0.35						HSCB (interact with) GATC	false		HSCB (interact with) GATC
					1	true	23680|11498							false							0.35						HSCB (interact with) ME2	false		HSCB (interact with) ME2
unspecified role	MI:0499	bait	MI:0496			false		unspecified role	MI:0499	prey	MI:0498		EBI-11324725	false	spoke expansion	Homo sapiens 293 cells transformed with SV40 large T antigen	9606	1055674	anti bait coimmunoprecipitation	MI:0006	0.35	Identification by mass spectrometry	MI:0427	25609649	association	MI:0914	JUN (association) TARS3	false	association	JUN (association) TARS3
unspecified role	MI:0499	bait	MI:0496			false		unspecified role	MI:0499	prey	MI:0498		EBI-11324725	false	spoke expansion	Homo sapiens 293 cells transformed with SV40 large T antigen	9606	1056258	anti bait coimmunoprecipitation	MI:0006	0.35	Identification by mass spectrometry	MI:0427	25609649	association	MI:0914	JUN (association) TARS1	false	association	JUN (association) TARS1
unspecified role	MI:0499	bait	MI:0496			false		unspecified role	MI:0499	prey	MI:0498		EBI-11323169	false	spoke expansion	Homo sapiens 293 cells transformed with SV40 large T antigen	9606	1051637	anti bait coimmunoprecipitation	MI:0006	0.35	Identification by mass spectrometry	MI:0427	25609649	association	MI:0914	JUN (association) TARS1	false	association	JUN (association) TARS1
unspecified role	MI:0499	bait	MI:0496			false		unspecified role	MI:0499	prey	MI:0498		EBI-11324725	false	spoke expansion	Homo sapiens 293 cells transformed with SV40 large T antigen	9606	1056525	anti bait coimmunoprecipitation	MI:0006	0.35	Identification by mass spectrometry	MI:0427	25609649	association	MI:0914	JUN (association) AASDHPPT	false	association	JUN (association) AASDHPPT
unspecified role	MI:0499	bait	MI:0496			false		unspecified role	MI:0499	prey	MI:0498		EBI-11324725	false	spoke expansion	Homo sapiens 293 cells transformed with SV40 large T antigen	9606	1055985	anti bait coimmunoprecipitation	MI:0006	0.35	Identification by mass spectrometry	MI:0427	25609649	association	MI:0914	JUN (association) YARS2	false	association	JUN (association) YARS2
unspecified role	MI:0499	bait	MI:0496			false		unspecified role	MI:0499	prey	MI:0498		EBI-11324725	false	spoke expansion	Homo sapiens 293 cells transformed with SV40 large T antigen	9606	1056911	anti bait coimmunoprecipitation	MI:0006	0.35	Identification by mass spectrometry	MI:0427	25609649	association	MI:0914	JUN (association) SARS2	false	association	JUN (association) SARS2
unspecified role	MI:0499	bait	MI:0496			false		unspecified role	MI:0499	prey	MI:0498		EBI-11324725	false	spoke expansion	Homo sapiens 293 cells transformed with SV40 large T antigen	9606	1055975	anti bait coimmunoprecipitation	MI:0006	0.35	Identification by mass spectrometry	MI:0427	25609649	association	MI:0914	JUN (association) TARS2	false	association	JUN (association) TARS2
unspecified role	MI:0499	bait	MI:0496			false		unspecified role	MI:0499	prey	MI:0498		EBI-11323169	false	spoke expansion	Homo sapiens 293 cells transformed with SV40 large T antigen	9606	1051940	anti bait coimmunoprecipitation	MI:0006	0.35	Identification by mass spectrometry	MI:0427	25609649	association	MI:0914	JUN (association) PARS2	false	association	JUN (association) PARS2
unspecified role	MI:0499	bait	MI:0496			false		unspecified role	MI:0499	prey	MI:0498		EBI-11324725	false	spoke expansion	Homo sapiens 293 cells transformed with SV40 large T antigen	9606	1053401	anti bait coimmunoprecipitation	MI:0006	0.35	Identification by mass spectrometry	MI:0427	25609649	association	MI:0914	JUN (association) MGST2	false	association	JUN (association) MGST2
unspecified role	MI:0499	bait	MI:0496			false		unspecified role	MI:0499	prey	MI:0498		EBI-11324725	false	spoke expansion	Homo sapiens 293 cells transformed with SV40 large T antigen	9606	1053647	anti bait coimmunoprecipitation	MI:0006	0.35	Identification by mass spectrometry	MI:0427	25609649	association	MI:0914	JUN (association) GLDC	false	association	JUN (association) GLDC
					1	true	23746|11432							false							0.35						JUN (interact with) SARS2	false		JUN (interact with) SARS2
					1	true	23736|11442							false							0.35						JUN (interact with) TARS3	false		JUN (interact with) TARS3
					1	true	23748|11430							false							0.35						JUN (interact with) TARS2	false		JUN (interact with) TARS2
					2	true	23738|23740|11438|11440							false							0.35						JUN (interact with) TARS1	false		JUN (interact with) TARS1
					1	true	23750|11428							false							0.35						JUN (interact with) PARS2	false		JUN (interact with) PARS2
					1	true	23752|11426							false							0.35						JUN (interact with) MGST2	false		JUN (interact with) MGST2
					1	true	23754|11424							false							0.35						JUN (interact with) GLDC	false		JUN (interact with) GLDC
					1	true	23742|11436							false							0.35						JUN (interact with) AASDHPPT	false		JUN (interact with) AASDHPPT
					1	true	23744|11434							false							0.35						JUN (interact with) YARS2	false		JUN (interact with) YARS2
unspecified role	MI:0499	bait	MI:0496	EBI-11152361		false		unspecified role	MI:0499	prey	MI:0498		EBI-11152254	false	spoke expansion	Homo sapiens epitheloid cervix carcinoma cells	9606	982429	anti tag coimmunoprecipitation	MI:0007	0.35	sequence tag identification	MI:0102	26496610	association	MI:0914	NCBP2 (association) TARS3	false	association	NCBP2 (association) TARS3
				EBI-11152361	1	true	23774|11404							false							0.35						NCBP2 (interact with) TARS3	false		NCBP2 (interact with) TARS3
unspecified role	MI:0499	bait	MI:0496	EBI-11152141		false		unspecified role	MI:0499	prey	MI:0498		EBI-11152114	false	spoke expansion	Homo sapiens epitheloid cervix carcinoma cells	9606	982207	anti tag coimmunoprecipitation	MI:0007	0.35	sequence tag identification	MI:0102	26496610	association	MI:0914	ETAA1 (association) TARS3	false	association	ETAA1 (association) TARS3
				EBI-11152141	1	true	23778|11400							false							0.35						ETAA1 (interact with) TARS3	false		ETAA1 (interact with) TARS3
unspecified role	MI:0499	bait	MI:0496	EBI-11110680		false		unspecified role	MI:0499	prey	MI:0498		EBI-11110438	false	spoke expansion	Homo sapiens epitheloid cervix carcinoma cells	9606	941108	anti tag coimmunoprecipitation	MI:0007	0.35	sequence tag identification	MI:0102	26496610	association	MI:0914	Tmed10 (association) TARS3	false	association	Tmed10 (association) TARS3
				EBI-11110680	1	true	23782|11396							false							0.35						Tmed10 (interact with) TARS3	false		Tmed10 (interact with) TARS3
unspecified role	MI:0499	bait	MI:0496	EBI-11105609		false		unspecified role	MI:0499	prey	MI:0498		EBI-11105437	false	spoke expansion	Homo sapiens epitheloid cervix carcinoma cells	9606	935819	anti tag coimmunoprecipitation	MI:0007	0.35	sequence tag identification	MI:0102	26496610	association	MI:0914	MYC (association) TARS3	false	association	MYC (association) TARS3
unspecified role	MI:0499	bait	MI:0496	EBI-3962677		false		unspecified role	MI:0499	prey	MI:0498		EBI-3962281	false	spoke expansion	Homo sapiens normal diploid fibroblasts (HDF0	9606	9336644	tandem affinity purification	MI:0676	0.35	multidimensional protein identification technology	MI:0658	21150319	association	MI:0914	MYC (association) PDHA2	false	association	MYC (association) PDHA2
				EBI-11105609	1	true	23786|11392							false							0.35						MYC (interact with) TARS3	false		MYC (interact with) TARS3
				EBI-3962677	1	true	23788|11390							false							0.35						MYC (interact with) PDHA2	false		MYC (interact with) PDHA2
unspecified role	MI:0499	bait	MI:0496	EBI-11103666		false		unspecified role	MI:0499	prey	MI:0498		EBI-11103574	false	spoke expansion	Homo sapiens epitheloid cervix carcinoma cells	9606	933973	anti tag coimmunoprecipitation	MI:0007	0.35	sequence tag identification	MI:0102	26496610	association	MI:0914	CCNB1 (association) TARS3	false	association	CCNB1 (association) TARS3
				EBI-11103666	1	true	23794|11384							false							0.35						CCNB1 (interact with) TARS3	false		CCNB1 (interact with) TARS3
unspecified role	MI:0499	bait	MI:0496	EBI-11103407		false		unspecified role	MI:0499	prey	MI:0498		EBI-11103275	false	spoke expansion	Homo sapiens epitheloid cervix carcinoma cells	9606	933784	anti tag coimmunoprecipitation	MI:0007	0.35	sequence tag identification	MI:0102	26496610	association	MI:0914	SLAIN2 (association) TARS3	false	association	SLAIN2 (association) TARS3
				EBI-11103407	1	true	23798|11380							false							0.35						SLAIN2 (interact with) TARS3	false		SLAIN2 (interact with) TARS3
unspecified role	MI:0499	bait	MI:0496	EBI-11098242		false		unspecified role	MI:0499	prey	MI:0498		EBI-11098156	false	spoke expansion	Homo sapiens epitheloid cervix carcinoma cells	9606	928586	anti tag coimmunoprecipitation	MI:0007	0.35	sequence tag identification	MI:0102	26496610	association	MI:0914	MYH7 (association) TARS3	false	association	MYH7 (association) TARS3
				EBI-11098242	1	true	23802|11376							false							0.35						MYH7 (interact with) TARS3	false		MYH7 (interact with) TARS3
unspecified role	MI:0499	bait	MI:0496	EBI-11034798		false		unspecified role	MI:0499	prey	MI:0498		EBI-11034504	false	spoke expansion	Homo sapiens epitheloid cervix carcinoma cells	9606	847691	anti tag coimmunoprecipitation	MI:0007	0.35	sequence tag identification	MI:0102	26496610	association	MI:0914	THOC1 (association) TARS3	false	association	THOC1 (association) TARS3
				EBI-11034798	1	true	23806|11372							false							0.35						THOC1 (interact with) TARS3	false		THOC1 (interact with) TARS3
unspecified role	MI:0499	bait	MI:0496	EBI-11023531		false		unspecified role	MI:0499	prey	MI:0498		EBI-11023430	false	spoke expansion	Homo sapiens epitheloid cervix carcinoma cells	9606	831198	anti tag coimmunoprecipitation	MI:0007	0.35	sequence tag identification	MI:0102	26496610	association	MI:0914	Sart3 (association) TARS3	false	association	Sart3 (association) TARS3
				EBI-11023531	1	true	23810|11368							false							0.35						Sart3 (interact with) TARS3	false		Sart3 (interact with) TARS3
unspecified role	MI:0499	bait	MI:0496	EBI-11019148		false		unspecified role	MI:0499	prey	MI:0498		EBI-11019031	false	spoke expansion	Homo sapiens epitheloid cervix carcinoma cells	9606	823956	anti tag coimmunoprecipitation	MI:0007	0.35	sequence tag identification	MI:0102	26496610	association	MI:0914	Spred2 (association) TARS3	false	association	Spred2 (association) TARS3
unspecified role	MI:0499	bait	MI:0496	EBI-11019148		false		unspecified role	MI:0499	prey	MI:0498		EBI-11019031	false	spoke expansion	Homo sapiens epitheloid cervix carcinoma cells	9606	823974	anti tag coimmunoprecipitation	MI:0007	0.35	sequence tag identification	MI:0102	26496610	association	MI:0914	Spred2 (association) TXNL4A	false	association	Spred2 (association) TXNL4A
				EBI-11019148	1	true	23814|11364							false							0.35						Spred2 (interact with) TARS3	false		Spred2 (interact with) TARS3
				EBI-11019148	1	true	23816|11362							false							0.35						Spred2 (interact with) TXNL4A	false		Spred2 (interact with) TXNL4A
unspecified role	MI:0499	neutral component	MI:0497			false		unspecified role	MI:0499	neutral component	MI:0497		EBI-10494500	false		Saccharomyces cerevisiae (Baker's yeast)	4932	487429	validated two hybrid	MI:1356	0.56	nucleotide sequence identification	MI:0078	25416956	physical association	MI:0915	b2rdx5_human (physical association) TARS3	false	physical association	b2rdx5_human (physical association) TARS3
					3	true	23822|23532|23536|11356|11642|11646							false							0.56						b2rdx5_human (interact with) TARS3	false		b2rdx5_human (interact with) TARS3
unspecified role	MI:0499	bait	MI:0496	EBI-7814147		false		unspecified role	MI:0499	prey	MI:0498		EBI-7813915	false	spoke expansion	Homo sapiens epitheloid cervix carcinoma cells	9606	11015681	tandem affinity purification	MI:0676	0.35	predetermined participant	MI:0396	18274552	association	MI:0914	NEDD8 (association) TARS1	false	association	NEDD8 (association) TARS1
				EBI-7814147	1	true	23826|11352							false							0.35						NEDD8 (interact with) TARS1	false		NEDD8 (interact with) TARS1
unspecified role	MI:0499	bait	MI:0496	EBI-6917561		false		unspecified role	MI:0499	prey	MI:0498		EBI-6917061	false	spoke expansion	Homo sapiens endothelail cells/endothelium	9606	10092745	pull down	MI:0096	0.35	sequence tag identification	MI:0102	23606334	association	MI:0914	15-deoxy-delta(12,14 (association) TARS1	false	association	15-deoxy-delta(12,14 (association) TARS1
				EBI-6917561	1	true	23830|11348							false							0.35						15-deoxy-delta(12,14 (interact with) TARS1	false		15-deoxy-delta(12,14 (interact with) TARS1
unspecified role	MI:0499	bait	MI:0496	EBI-6291209|EBI-6290744		false		unspecified role	MI:0499	prey	MI:0498		EBI-6286562	false	spoke expansion	In vitro	-1	9775719	cross-linking study	MI:0030	0.53	sequence tag identification	MI:0102	19738201	association	MI:0914	VCAM1 (association) TARS1	false	association	VCAM1 (association) TARS1
unspecified role	MI:0499	bait	MI:0496	EBI-6191080		false		unspecified role	MI:0499	prey	MI:0498		EBI-6191076	false	spoke expansion	In vitro	-1	9740974	cross-linking study	MI:0030	0.53	sequence tag identification	MI:0102	22623428	association	MI:0914	VCAM1 (association) TARS1	false	association	VCAM1 (association) TARS1
unspecified role	MI:0499	bait	MI:0496	EBI-6191074		false		unspecified role	MI:0499	prey	MI:0498		EBI-6191068	false	spoke expansion	In vitro	-1	9739697	cross-linking study	MI:0030	0.53	sequence tag identification	MI:0102	22623428	association	MI:0914	VCAM1 (association) TARS1	false	association	VCAM1 (association) TARS1
unspecified role	MI:0499	bait	MI:0496	EBI-6189918		false		unspecified role	MI:0499	prey	MI:0498		EBI-6189915	false	spoke expansion	In vitro	-1	9738309	cross-linking study	MI:0030	0.53	sequence tag identification	MI:0102	22623428	association	MI:0914	VCAM1 (association) TARS1	false	association	VCAM1 (association) TARS1
unspecified role	MI:0499	bait	MI:0496	EBI-6291209|EBI-6290744		false		unspecified role	MI:0499	prey	MI:0498		EBI-6286562	false	spoke expansion	In vitro	-1	9775833	cross-linking study	MI:0030	0.53	sequence tag identification	MI:0102	19738201	association	MI:0914	VCAM1 (association) SRM	false	association	VCAM1 (association) SRM
unspecified role	MI:0499	bait	MI:0496	EBI-6191080		false		unspecified role	MI:0499	prey	MI:0498		EBI-6191076	false	spoke expansion	In vitro	-1	9741058	cross-linking study	MI:0030	0.53	sequence tag identification	MI:0102	22623428	association	MI:0914	VCAM1 (association) SRM	false	association	VCAM1 (association) SRM
unspecified role	MI:0499	bait	MI:0496	EBI-6191074		false		unspecified role	MI:0499	prey	MI:0498		EBI-6191068	false	spoke expansion	In vitro	-1	9739755	cross-linking study	MI:0030	0.53	sequence tag identification	MI:0102	22623428	association	MI:0914	VCAM1 (association) SRM	false	association	VCAM1 (association) SRM
unspecified role	MI:0499	bait	MI:0496	EBI-6189925|EBI-6189927		false		unspecified role	MI:0499	prey	MI:0498		EBI-6189921	true	spoke expansion	In vitro	-1	9738663	cross-linking study	MI:0030	0.53	sequence tag identification	MI:0102	22623428	association	MI:0914	VCAM1 (association) SRM	false	association	VCAM1 (association) SRM
				EBI-6191080|EBI-6189925|EBI-6189927|EBI-6290744|EBI-6191074|EBI-6291209	4	true	23842|23844|23846|23848|11330|11332|11334|11336							false							0.53						VCAM1 (interact with) SRM	false		VCAM1 (interact with) SRM
				EBI-6191080|EBI-6189918|EBI-6290744|EBI-6191074|EBI-6291209	4	true	23834|23836|23838|23840|11338|11340|11342|11344							false							0.53						VCAM1 (interact with) TARS1	false		VCAM1 (interact with) TARS1
unspecified role	MI:0499	bait	MI:0496			false		unspecified role	MI:0499	prey	MI:0498		EBI-6285956	false	spoke expansion	In vitro	-1	9775254	cross-linking study	MI:0030	0.35	sequence tag identification	MI:0102	19738201	association	MI:0914	FN1 (association) TARS1	false	association	FN1 (association) TARS1
					1	true	23854|11324							false							0.35						FN1 (interact with) TARS1	false		FN1 (interact with) TARS1
unspecified role	MI:0499	bait	MI:0496	EBI-6175736		false		unspecified role	MI:0499	prey	MI:0498		EBI-6175673	false	spoke expansion	Homo sapiens transformed primary embryonal kidney cells	9606	9732406	pull down	MI:0096	0.46	sequence tag identification	MI:0102	22190034	association	MI:0914	gag (association) TARS1	false	association	gag (association) TARS1
unspecified role	MI:0499	bait	MI:0496	EBI-6174699		false		unspecified role	MI:0499	prey	MI:0498		EBI-6174633	false	spoke expansion	Homo sapiens transformed primary embryonal kidney cells	9606	9731009	anti tag coimmunoprecipitation	MI:0007	0.46	sequence tag identification	MI:0102	22190034	association	MI:0914	gag (association) TARS1	false	association	gag (association) TARS1
				EBI-6174699|EBI-6175736	2	true	23858|23860|11318|11320							false							0.46						gag (interact with) TARS1	false		gag (interact with) TARS1
unspecified role	MI:0499	bait	MI:0496	EBI-3257338		false		unspecified role	MI:0499	prey	MI:0498		EBI-3255690	false	spoke expansion	Homo sapiens 293 cells transformed with SV40 large T antigen	9606	8899697	anti tag coimmunoprecipitation	MI:0007	0.35	sequence tag identification	MI:0102	20562859	association	MI:0914	ATG101 (association) TARS1	false	association	ATG101 (association) TARS1
				EBI-3257338	1	true	23864|11314							false							0.35						ATG101 (interact with) TARS1	false		ATG101 (interact with) TARS1
unspecified role	MI:0499	bait	MI:0496	EBI-3253464		false		unspecified role	MI:0499	prey	MI:0498		EBI-3253145	false	spoke expansion	Homo sapiens 293 cells transformed with SV40 large T antigen	9606	8899552	anti tag coimmunoprecipitation	MI:0007	0.35	sequence tag identification	MI:0102	20562859	association	MI:0914	DDA1 (association) TARS1	false	association	DDA1 (association) TARS1
unspecified role	MI:0499	bait	MI:0496	EBI-3253464		false		unspecified role	MI:0499	prey	MI:0498		EBI-3253145	false	spoke expansion	Homo sapiens 293 cells transformed with SV40 large T antigen	9606	8899562	anti tag coimmunoprecipitation	MI:0007	0.35	sequence tag identification	MI:0102	20562859	association	MI:0914	DDA1 (association) SRM	false	association	DDA1 (association) SRM
				EBI-3253464	1	true	23870|11308							false							0.35						DDA1 (interact with) SRM	false		DDA1 (interact with) SRM
				EBI-3253464	1	true	23868|11310							false							0.35						DDA1 (interact with) TARS1	false		DDA1 (interact with) TARS1
unspecified role	MI:0499	bait	MI:0496	EBI-3237694		false		unspecified role	MI:0499	prey	MI:0498		EBI-3237043	false	spoke expansion	Homo sapiens 293 cells transformed with SV40 large T antigen	9606	8898925	anti tag coimmunoprecipitation	MI:0007	0.35	sequence tag identification	MI:0102	20562859	association	MI:0914	NIPSNAP2 (association) TARS1	false	association	NIPSNAP2 (association) TARS1
				EBI-3237694	1	true	23876|11302							false							0.35						NIPSNAP2 (interact with) TARS1	false		NIPSNAP2 (interact with) TARS1
unspecified role	MI:0499	bait	MI:0496	EBI-3218605		false		unspecified role	MI:0499	prey	MI:0498		EBI-3217185	false	spoke expansion	Homo sapiens 293 cells transformed with SV40 large T antigen	9606	8898218	anti tag coimmunoprecipitation	MI:0007	0.35	sequence tag identification	MI:0102	20562859	association	MI:0914	PIK3C2A (association) TARS1	false	association	PIK3C2A (association) TARS1
				EBI-3218605	1	true	23880|11298							false							0.35						PIK3C2A (interact with) TARS1	false		PIK3C2A (interact with) TARS1
unspecified role	MI:0499	bait	MI:0496	EBI-3208393		false		unspecified role	MI:0499	prey	MI:0498		EBI-3207632	false	spoke expansion	Homo sapiens 293 cells transformed with SV40 large T antigen	9606	8897852	anti tag coimmunoprecipitation	MI:0007	0.35	sequence tag identification	MI:0102	20562859	association	MI:0914	PRKAG1 (association) TARS1	false	association	PRKAG1 (association) TARS1
				EBI-3208393	1	true	23884|11294							false							0.35						PRKAG1 (interact with) TARS1	false		PRKAG1 (interact with) TARS1
unspecified role	MI:0499	bait	MI:0496	EBI-3207148		false		unspecified role	MI:0499	prey	MI:0498		EBI-3205794	false	spoke expansion	Homo sapiens 293 cells transformed with SV40 large T antigen	9606	8897814	anti tag coimmunoprecipitation	MI:0007	0.35	sequence tag identification	MI:0102	20562859	association	MI:0914	PRKAG2 (association) TARS1	false	association	PRKAG2 (association) TARS1
				EBI-3207148	1	true	23888|11290							false							0.35						PRKAG2 (interact with) TARS1	false		PRKAG2 (interact with) TARS1
unspecified role	MI:0499	bait	MI:0496	EBI-3192676		false		unspecified role	MI:0499	prey	MI:0498		EBI-3192412	false	spoke expansion	Homo sapiens 293 cells transformed with SV40 large T antigen	9606	8897079	anti tag coimmunoprecipitation	MI:0007	0.35	sequence tag identification	MI:0102	20562859	association	MI:0914	UBA5 (association) TARS1	false	association	UBA5 (association) TARS1
				EBI-3192676	1	true	23892|11286							false							0.35						UBA5 (interact with) TARS1	false		UBA5 (interact with) TARS1
unspecified role	MI:0499	bait	MI:0496	EBI-28964413		false		unspecified role	MI:0499	prey	MI:0498		EBI-28964410	false	spoke expansion	Homo sapiens lung microvascular endothelial cell	9606	8729231	pull down	MI:0096	0.4	sequence tag identification	MI:0102	26970331	physical association	MI:0915	heparin (physical association) TARS1	false	physical association	heparin (physical association) TARS1
unspecified role	MI:0499	bait	MI:0496	EBI-28964413		false		unspecified role	MI:0499	prey	MI:0498		EBI-28964410	false	spoke expansion	Homo sapiens lung microvascular endothelial cell	9606	8729403	pull down	MI:0096	0.4	sequence tag identification	MI:0102	26970331	physical association	MI:0915	heparin (physical association) ME2	false	physical association	heparin (physical association) ME2
unspecified role	MI:0499	bait	MI:0496	EBI-28964413		false		unspecified role	MI:0499	prey	MI:0498		EBI-28964410	false	spoke expansion	Homo sapiens lung microvascular endothelial cell	9606	8729770	pull down	MI:0096	0.4	sequence tag identification	MI:0102	26970331	physical association	MI:0915	heparin (physical association) ANPEP	false	physical association	heparin (physical association) ANPEP
				EBI-28964413	1	true	23898|11280							false							0.4						heparin (interact with) ME2	false		heparin (interact with) ME2
				EBI-28964413	1	true	23900|11278							false							0.4						heparin (interact with) ANPEP	false		heparin (interact with) ANPEP
				EBI-28964413	1	true	23896|11282							false							0.4						heparin (interact with) TARS1	false		heparin (interact with) TARS1
unspecified role	MI:0499	bait	MI:0496	EBI-28942268|EBI-28942270		false		unspecified role	MI:0499	prey	MI:0498		EBI-28942265	false	spoke expansion	human-Flp-In T-REx 293	9606	8710401	pull down	MI:0096	0.35	sequence tag identification	MI:0102	32707033	association	MI:0914	MYLK4 (association) TARS1	false	association	MYLK4 (association) TARS1
				EBI-28942268|EBI-28942270	1	true	23908|11270							false							0.35						MYLK4 (interact with) TARS1	false		MYLK4 (interact with) TARS1
unspecified role	MI:0499	bait	MI:0496	EBI-28941348|EBI-28941350		false		unspecified role	MI:0499	prey	MI:0498		EBI-28941345	false	spoke expansion	human-Flp-In T-REx 293	9606	8708481	pull down	MI:0096	0.35	sequence tag identification	MI:0102	32707033	association	MI:0914	MYLK (association) TARS1	false	association	MYLK (association) TARS1
unspecified role	MI:0499	bait	MI:0496	EBI-28941348|EBI-28941350		false		unspecified role	MI:0499	prey	MI:0498		EBI-28941345	false	spoke expansion	human-Flp-In T-REx 293	9606	8708485	pull down	MI:0096	0.35	sequence tag identification	MI:0102	32707033	association	MI:0914	MYLK (association) ME2	false	association	MYLK (association) ME2
				EBI-28941348|EBI-28941350	1	true	23914|11264							false							0.35						MYLK (interact with) ME2	false		MYLK (interact with) ME2
				EBI-28941348|EBI-28941350	1	true	23912|11266							false							0.35						MYLK (interact with) TARS1	false		MYLK (interact with) TARS1
unspecified role	MI:0499	bait	MI:0496	EBI-28939001|EBI-28939003		false		unspecified role	MI:0499	prey	MI:0498		EBI-28938998	false	spoke expansion	human-Flp-In T-REx 293	9606	8706570	pull down	MI:0096	0.35	sequence tag identification	MI:0102	32707033	association	MI:0914	PRKCZ (association) TARS1	false	association	PRKCZ (association) TARS1
unspecified role	MI:0499	bait	MI:0496	EBI-25391068		false		unspecified role	MI:0499	prey	MI:0498		EBI-25391062	false	spoke expansion	human HKE-3 cell line	9606	7300438	anti tag coimmunoprecipitation	MI:0007	0.35	sequence tag identification	MI:0102	31980649	association	MI:0914	PRKCZ (association) ADH1C	false	association	PRKCZ (association) ADH1C
unspecified role	MI:0499	bait	MI:0496	EBI-25380062		false		unspecified role	MI:0499	prey	MI:0498		EBI-25380056	false	spoke expansion	Human colon carcinoma HCT116 cells	9606	7292995	anti tag coimmunoprecipitation	MI:0007	0.35	sequence tag identification	MI:0102	31980649	association	MI:0914	PRKCZ (association) ADH1C	false	association	PRKCZ (association) ADH1C
				EBI-28939001|EBI-28939003	1	true	23920|11258							false							0.35						PRKCZ (interact with) TARS1	false		PRKCZ (interact with) TARS1
				EBI-25391068|EBI-25380062	2	true	23922|23924|11254|11256							false							0.35						PRKCZ (interact with) ADH1C	false		PRKCZ (interact with) ADH1C
unspecified role	MI:0499	bait	MI:0496	EBI-28931004|EBI-28931006		false		unspecified role	MI:0499	prey	MI:0498		EBI-28931001	false	spoke expansion	human-Flp-In T-REx 293	9606	8698947	pull down	MI:0096	0.35	sequence tag identification	MI:0102	32707033	association	MI:0914	MAP3K7 (association) TARS1	false	association	MAP3K7 (association) TARS1
				EBI-28931006|EBI-28931004	1	true	23930|11248							false							0.35						MAP3K7 (interact with) TARS1	false		MAP3K7 (interact with) TARS1
unspecified role	MI:0499	bait	MI:0496	EBI-26955976		false		unspecified role	MI:0499	prey	MI:0498		EBI-26955247	false	spoke expansion	Homo sapiens	9606	8423464	proximity-dependent biotin identification	MI:1314	0.27	sequence tag identification	MI:0102	32529326	proximity	MI:2364	NDN (proximity) TARS1	false	proximity	NDN (proximity) TARS1
				EBI-26955976	1	true	23934|11244							false							0.27						NDN (interact with) TARS1	false		NDN (interact with) TARS1
unspecified role	MI:0499	neutral component	MI:0497			false		unspecified role	MI:0499	neutral component	MI:0497	EBI-26219661	EBI-26219657	false		Saccharomyces cerevisiae (Baker's yeast)	4932	7950081	validated two hybrid	MI:1356	0.56	predetermined participant	MI:0396	32814053	physical association	MI:0915	OPTN (physical association) TARS1	false	physical association	OPTN (physical association) TARS1
unspecified role	MI:0499	bait	MI:0496			false		unspecified role	MI:0499	prey	MI:0498	EBI-26065522	EBI-26065518	false		Saccharomyces cerevisiae (Baker's yeast)	4932	7777687	two hybrid pooling approach	MI:0398	0.56	predetermined participant	MI:0396	32814053	physical association	MI:0915	OPTN (physical association) TARS1	false	physical association	OPTN (physical association) TARS1
unspecified role	MI:0499	bait	MI:0496			false		unspecified role	MI:0499	prey	MI:0498	EBI-25910614	EBI-25910610	false		Saccharomyces cerevisiae (Baker's yeast)	4932	7618062	two hybrid array	MI:0397	0.56	predetermined participant	MI:0396	32814053	physical association	MI:0915	OPTN (physical association) TARS1	false	physical association	OPTN (physical association) TARS1
					3	true	23938|23940|23942|11236|11238|11240					EBI-26219661|EBI-25910614|EBI-26065522		false							0.56						OPTN (interact with) TARS1	false		OPTN (interact with) TARS1
unspecified role	MI:0499	neutral component	MI:0497			false		unspecified role	MI:0499	neutral component	MI:0497		EBI-26201848	false		Saccharomyces cerevisiae (Baker's yeast)	4932	7933563	validated two hybrid	MI:1356	0.56	predetermined participant	MI:0396	32814053	physical association	MI:0915	SULT1B1 (physical association) TARS1	false	physical association	SULT1B1 (physical association) TARS1
unspecified role	MI:0499	prey	MI:0498			false		unspecified role	MI:0499	bait	MI:0496		EBI-26047701	false		Saccharomyces cerevisiae (Baker's yeast)	4932	7761115	two hybrid pooling approach	MI:0398	0.56	predetermined participant	MI:0396	32814053	physical association	MI:0915	SULT1B1 (physical association) TARS1	false	physical association	SULT1B1 (physical association) TARS1
unspecified role	MI:0499	prey	MI:0498			false		unspecified role	MI:0499	bait	MI:0496		EBI-25892501	false		Saccharomyces cerevisiae (Baker's yeast)	4932	7602561	two hybrid array	MI:0397	0.56	predetermined participant	MI:0396	32814053	physical association	MI:0915	SULT1B1 (physical association) TARS1	false	physical association	SULT1B1 (physical association) TARS1
					3	true	23946|23948|23950|11228|11230|11232							false							0.56						SULT1B1 (interact with) TARS1	false		SULT1B1 (interact with) TARS1
unspecified role	MI:0499	bait	MI:0496	EBI-25773197		false		unspecified role	MI:0499	prey	MI:0498		EBI-25773054	false	spoke expansion	Homo sapiens Caucasian lung carcinoma cell line	9606	7528947	tandem affinity purification	MI:0676	0.35	Identification by mass spectrometry	MI:0427	21715506	association	MI:0914	PA (association) TARS1	false	association	PA (association) TARS1
unspecified role	MI:0499	bait	MI:0496	EBI-25772992		false		unspecified role	MI:0499	prey	MI:0498		EBI-25772822	false	spoke expansion	Homo sapiens Caucasian lung carcinoma cell line	9606	7528699	tandem affinity purification	MI:0676	0.35	Identification by mass spectrometry	MI:0427	21715506	association	MI:0914	PA (association) HKDC1	false	association	PA (association) HKDC1
				EBI-25773197	1	true	23954|11224							false							0.35						PA (interact with) TARS1	false		PA (interact with) TARS1
				EBI-25772992	1	true	23956|11222							false							0.35						PA (interact with) HKDC1	false		PA (interact with) HKDC1
unspecified role	MI:0499	bait	MI:0496	EBI-25603129		false		unspecified role	MI:0499	prey	MI:0498		EBI-25603126	false	spoke expansion	Homo sapiens 293 cells transformed with SV40 large T antigen	9606	7460337	anti tag coimmunoprecipitation	MI:0007	0.35	sequence tag identification	MI:0102	33208464	association	MI:0914	M (association) TARS1	false	association	M (association) TARS1
unspecified role	MI:0499	bait	MI:0496	EBI-25607855		false		unspecified role	MI:0499	prey	MI:0498		EBI-25607852	false	spoke expansion	Homo sapiens 293 cells transformed with SV40 large T antigen	9606	7464809	anti tag coimmunoprecipitation	MI:0007	0.35	sequence tag identification	MI:0102	33208464	association	MI:0914	M (association) TXNDC9	false	association	M (association) TXNDC9
unspecified role	MI:0499	bait	MI:0496	EBI-25603129		false		unspecified role	MI:0499	prey	MI:0498		EBI-25603126	false	spoke expansion	Homo sapiens 293 cells transformed with SV40 large T antigen	9606	7457507	anti tag coimmunoprecipitation	MI:0007	0.35	sequence tag identification	MI:0102	33208464	association	MI:0914	M (association) AASDHPPT	false	association	M (association) AASDHPPT
unspecified role	MI:0499	bait	MI:0496	EBI-25603129		false		unspecified role	MI:0499	prey	MI:0498		EBI-25603126	false	spoke expansion	Homo sapiens 293 cells transformed with SV40 large T antigen	9606	7458825	anti tag coimmunoprecipitation	MI:0007	0.35	sequence tag identification	MI:0102	33208464	association	MI:0914	M (association) GCAT	false	association	M (association) GCAT
unspecified role	MI:0499	bait	MI:0496	EBI-25603129		false		unspecified role	MI:0499	prey	MI:0498		EBI-25603126	false	spoke expansion	Homo sapiens 293 cells transformed with SV40 large T antigen	9606	7459520	anti tag coimmunoprecipitation	MI:0007	0.35	sequence tag identification	MI:0102	33208464	association	MI:0914	M (association) SRM	false	association	M (association) SRM
unspecified role	MI:0499	bait	MI:0496	EBI-25603129		false		unspecified role	MI:0499	prey	MI:0498		EBI-25603126	false	spoke expansion	Homo sapiens 293 cells transformed with SV40 large T antigen	9606	7460450	anti tag coimmunoprecipitation	MI:0007	0.35	sequence tag identification	MI:0102	33208464	association	MI:0914	M (association) TARS2	false	association	M (association) TARS2
unspecified role	MI:0499	bait	MI:0496	EBI-25603129		false		unspecified role	MI:0499	prey	MI:0498		EBI-25603126	false	spoke expansion	Homo sapiens 293 cells transformed with SV40 large T antigen	9606	7459603	anti tag coimmunoprecipitation	MI:0007	0.35	sequence tag identification	MI:0102	33208464	association	MI:0914	M (association) EARS2	false	association	M (association) EARS2
				EBI-25603129	1	true	23968|11210							false							0.35						M (interact with) GCAT	false		M (interact with) GCAT
				EBI-25603129	1	true	23970|11208							false							0.35						M (interact with) SRM	false		M (interact with) SRM
				EBI-25603129	1	true	23972|11206							false							0.35						M (interact with) TARS2	false		M (interact with) TARS2
				EBI-25603129	1	true	23962|11216							false							0.35						M (interact with) TARS1	false		M (interact with) TARS1
				EBI-25607855	1	true	23964|11214							false							0.35						M (interact with) TXNDC9	false		M (interact with) TXNDC9
				EBI-25603129	1	true	23974|11204							false							0.35						M (interact with) EARS2	false		M (interact with) EARS2
				EBI-25603129	1	true	23966|11212							false							0.35						M (interact with) AASDHPPT	false		M (interact with) AASDHPPT
unspecified role	MI:0499	bait	MI:0496	EBI-22299593		false		unspecified role	MI:0499	prey	MI:0498	EBI-22299589	EBI-22299585	false		Saccharomyces cerevisiae (Baker's yeast)	4932	4708207	two hybrid pooling approach	MI:0398	0.37	nucleotide sequence identification	MI:0078	26714771	physical association	MI:0915	iglC2 (physical association) TARS1	false	physical association	iglC2 (physical association) TARS1
				EBI-22299593	1	true	23990|11188					EBI-22299589		false							0.37						iglC2 (interact with) TARS1	false		iglC2 (interact with) TARS1
unspecified role	MI:0499	bait	MI:0496	EBI-21526184		false		unspecified role	MI:0499	prey	MI:0498		EBI-21526180	false	spoke expansion	Homo sapiens 293 cells transformed with SV40 large T antigen	9606	4128924	anti tag coimmunoprecipitation	MI:0007	0.35	sequence tag identification	MI:0102	28514442	association	MI:0914	CCDC102B (association) TARS1	false	association	CCDC102B (association) TARS1
				EBI-21526184	1	true	23994|11184							false							0.35						CCDC102B (interact with) TARS1	false		CCDC102B (interact with) TARS1
unspecified role	MI:0499	bait	MI:0496	EBI-21525619		false		unspecified role	MI:0499	prey	MI:0498		EBI-21525615	false	spoke expansion	Homo sapiens 293 cells transformed with SV40 large T antigen	9606	4128210	anti tag coimmunoprecipitation	MI:0007	0.35	sequence tag identification	MI:0102	28514442	association	MI:0914	EIF4E2 (association) TARS1	false	association	EIF4E2 (association) TARS1
				EBI-21525619	1	true	23998|11180							false							0.35						EIF4E2 (interact with) TARS1	false		EIF4E2 (interact with) TARS1
unspecified role	MI:0499	bait	MI:0496	EBI-21329073|EBI-21329075		false		unspecified role	MI:0499	prey	MI:0498		EBI-21329068	false	spoke expansion	Homo sapiens 293 cells transformed with SV40 large T antigen	9606	4017448	tandem affinity purification	MI:0676	0.35	sequence tag identification	MI:0102	21145461	association	MI:0914	CUL3 (association) TARS1	false	association	CUL3 (association) TARS1
unspecified role	MI:0499	bait	MI:0496	EBI-21329073|EBI-21329075		false		unspecified role	MI:0499	prey	MI:0498		EBI-21329068	false	spoke expansion	Homo sapiens 293 cells transformed with SV40 large T antigen	9606	4016201	tandem affinity purification	MI:0676	0.35	sequence tag identification	MI:0102	21145461	association	MI:0914	CUL3 (association) FARS2	false	association	CUL3 (association) FARS2
unspecified role	MI:0499	bait	MI:0496	EBI-21329073|EBI-21329075		false		unspecified role	MI:0499	prey	MI:0498		EBI-21329068	false	spoke expansion	Homo sapiens 293 cells transformed with SV40 large T antigen	9606	4016349	tandem affinity purification	MI:0676	0.35	sequence tag identification	MI:0102	21145461	association	MI:0914	CUL3 (association) YARS2	false	association	CUL3 (association) YARS2
unspecified role	MI:0499	bait	MI:0496	EBI-21329073|EBI-21329075		false		unspecified role	MI:0499	prey	MI:0498		EBI-21329068	false	spoke expansion	Homo sapiens 293 cells transformed with SV40 large T antigen	9606	4017953	tandem affinity purification	MI:0676	0.35	sequence tag identification	MI:0102	21145461	association	MI:0914	CUL3 (association) SARS2	false	association	CUL3 (association) SARS2
unspecified role	MI:0499	bait	MI:0496	EBI-21329073|EBI-21329075		false		unspecified role	MI:0499	prey	MI:0498		EBI-21329068	false	spoke expansion	Homo sapiens 293 cells transformed with SV40 large T antigen	9606	4016199	tandem affinity purification	MI:0676	0.35	sequence tag identification	MI:0102	21145461	association	MI:0914	CUL3 (association) GCAT	false	association	CUL3 (association) GCAT
unspecified role	MI:0499	bait	MI:0496	EBI-21329073|EBI-21329075		false		unspecified role	MI:0499	prey	MI:0498		EBI-21329068	false	spoke expansion	Homo sapiens 293 cells transformed with SV40 large T antigen	9606	4017767	tandem affinity purification	MI:0676	0.35	sequence tag identification	MI:0102	21145461	association	MI:0914	CUL3 (association) TARS2	false	association	CUL3 (association) TARS2
unspecified role	MI:0499	bait	MI:0496	EBI-21329073|EBI-21329075		false		unspecified role	MI:0499	prey	MI:0498		EBI-21329068	false	spoke expansion	Homo sapiens 293 cells transformed with SV40 large T antigen	9606	4016243	tandem affinity purification	MI:0676	0.35	sequence tag identification	MI:0102	21145461	association	MI:0914	CUL3 (association) HK3	false	association	CUL3 (association) HK3
unspecified role	MI:0499	bait	MI:0496	EBI-21329073|EBI-21329075		false		unspecified role	MI:0499	prey	MI:0498		EBI-21329068	false	spoke expansion	Homo sapiens 293 cells transformed with SV40 large T antigen	9606	4016230	tandem affinity purification	MI:0676	0.35	sequence tag identification	MI:0102	21145461	association	MI:0914	CUL3 (association) PDHA2	false	association	CUL3 (association) PDHA2
				EBI-21329075|EBI-21329073	1	true	24004|11174							false							0.35						CUL3 (interact with) FARS2	false		CUL3 (interact with) FARS2
				EBI-21329075|EBI-21329073	1	true	24008|11170							false							0.35						CUL3 (interact with) SARS2	false		CUL3 (interact with) SARS2
				EBI-21329075|EBI-21329073	1	true	24010|11168							false							0.35						CUL3 (interact with) GCAT	false		CUL3 (interact with) GCAT
				EBI-21329075|EBI-21329073	1	true	24012|11166							false							0.35						CUL3 (interact with) TARS2	false		CUL3 (interact with) TARS2
				EBI-21329075|EBI-21329073	1	true	24002|11176							false							0.35						CUL3 (interact with) TARS1	false		CUL3 (interact with) TARS1
				EBI-21329075|EBI-21329073	1	true	24014|11164							false							0.35						CUL3 (interact with) HK3	false		CUL3 (interact with) HK3
				EBI-21329075|EBI-21329073	1	true	24016|11162							false							0.35						CUL3 (interact with) PDHA2	false		CUL3 (interact with) PDHA2
				EBI-21329075|EBI-21329073	1	true	24006|11172							false							0.35						CUL3 (interact with) YARS2	false		CUL3 (interact with) YARS2
unspecified role	MI:0499	bait	MI:0496	EBI-21323862|EBI-21323864		false		unspecified role	MI:0499	prey	MI:0498		EBI-21323857	false	spoke expansion	Homo sapiens 293 cells transformed with SV40 large T antigen	9606	4010376	tandem affinity purification	MI:0676	0.35	sequence tag identification	MI:0102	21145461	association	MI:0914	CUL1 (association) TARS1	false	association	CUL1 (association) TARS1
unspecified role	MI:0499	bait	MI:0496	EBI-21323862|EBI-21323864		false		unspecified role	MI:0499	prey	MI:0498		EBI-21323857	false	spoke expansion	Homo sapiens 293 cells transformed with SV40 large T antigen	9606	4009535	tandem affinity purification	MI:0676	0.35	sequence tag identification	MI:0102	21145461	association	MI:0914	CUL1 (association) KYAT3	false	association	CUL1 (association) KYAT3
unspecified role	MI:0499	bait	MI:0496	EBI-21323862|EBI-21323864		false		unspecified role	MI:0499	prey	MI:0498		EBI-21323857	false	spoke expansion	Homo sapiens 293 cells transformed with SV40 large T antigen	9606	4010368	tandem affinity purification	MI:0676	0.35	sequence tag identification	MI:0102	21145461	association	MI:0914	CUL1 (association) AOC1	false	association	CUL1 (association) AOC1
				EBI-21323862|EBI-21323864	1	true	24036|11142							false							0.35						CUL1 (interact with) KYAT3	false		CUL1 (interact with) KYAT3
				EBI-21323862|EBI-21323864	1	true	24038|11140							false							0.35						CUL1 (interact with) AOC1	false		CUL1 (interact with) AOC1
				EBI-21323862|EBI-21323864	1	true	24034|11144							false							0.35						CUL1 (interact with) TARS1	false		CUL1 (interact with) TARS1
unspecified role	MI:0499	bait	MI:0496	EBI-21028248		false		unspecified role	MI:0499	prey	MI:0498		EBI-21028244	false	spoke expansion	human breast cancer tumour cell line-epithelial cells	9606	3864647	anti tag coimmunoprecipitation	MI:0007	0.35	Identification by mass spectrometry	MI:0427	30462309	association	MI:0914	Mecom (association) TARS1	false	association	Mecom (association) TARS1
unspecified role	MI:0499	bait	MI:0496	EBI-21026256|EBI-21026258		false		unspecified role	MI:0499	prey	MI:0498		EBI-21026252	false	spoke expansion	human breast cancer tumour cell line-epithelial cells	9606	3861862	anti tag coimmunoprecipitation	MI:0007	0.35	Identification by mass spectrometry	MI:0427	30462309	association	MI:0914	Mecom (association) TARS1	false	association	Mecom (association) TARS1
unspecified role	MI:0499	bait	MI:0496	EBI-21028248		false		unspecified role	MI:0499	prey	MI:0498		EBI-21028244	false	spoke expansion	human breast cancer tumour cell line-epithelial cells	9606	3864325	anti tag coimmunoprecipitation	MI:0007	0.35	Identification by mass spectrometry	MI:0427	30462309	association	MI:0914	Mecom (association) PDHA2	false	association	Mecom (association) PDHA2
				EBI-21026256|EBI-21026258|EBI-21028248	2	true	24046|24048|11130|11132							false							0.35						Mecom (interact with) TARS1	false		Mecom (interact with) TARS1
				EBI-21028248	1	true	24050|11128							false							0.35						Mecom (interact with) PDHA2	false		Mecom (interact with) PDHA2
unspecified role	MI:0499	bait	MI:0496	EBI-21024518		false		unspecified role	MI:0499	prey	MI:0498		EBI-21024514	false	spoke expansion	human breast cancer tumour cell line-epithelial cells	9606	3860163	anti tag coimmunoprecipitation	MI:0007	0.35	Identification by mass spectrometry	MI:0427	30462309	association	MI:0914	Prdm16 (association) TARS1	false	association	Prdm16 (association) TARS1
unspecified role	MI:0499	bait	MI:0496	EBI-21022886|EBI-21022888		false		unspecified role	MI:0499	prey	MI:0498		EBI-21022882	false	spoke expansion	human breast cancer tumour cell line-epithelial cells	9606	3858441	anti tag coimmunoprecipitation	MI:0007	0.35	Identification by mass spectrometry	MI:0427	30462309	association	MI:0914	Prdm16 (association) TARS1	false	association	Prdm16 (association) TARS1
				EBI-21024518|EBI-21022888|EBI-21022886	2	true	24056|24058|11120|11122							false							0.35						Prdm16 (interact with) TARS1	false		Prdm16 (interact with) TARS1
unspecified role	MI:0499	bait	MI:0496	EBI-12503580		false		unspecified role	MI:0499	prey	MI:0498		EBI-12503575	false	spoke expansion	Homo sapiens 293 cells transformed with SV40 large T antigen	9606	1546851	anti tag coimmunoprecipitation	MI:0007	0.35	sequence tag identification	MI:0102	26972000	association	MI:0914	RIPK4 (association) TARS1	false	association	RIPK4 (association) TARS1
				EBI-12503580	1	true	24062|11116							false							0.35						RIPK4 (interact with) TARS1	false		RIPK4 (interact with) TARS1
unspecified role	MI:0499	bait	MI:0496	EBI-11109190		false		unspecified role	MI:0499	prey	MI:0498		EBI-11108899	false	spoke expansion	Homo sapiens epitheloid cervix carcinoma cells	9606	939530	anti tag coimmunoprecipitation	MI:0007	0.35	sequence tag identification	MI:0102	26496610	association	MI:0914	Max (association) TARS1	false	association	Max (association) TARS1
				EBI-11109190	1	true	24066|11112							false							0.35						Max (interact with) TARS1	false		Max (interact with) TARS1
unspecified role	MI:0499	bait	MI:0496	EBI-11038544		false		unspecified role	MI:0499	prey	MI:0498		EBI-11038263	false	spoke expansion	Homo sapiens epitheloid cervix carcinoma cells	9606	853038	anti tag coimmunoprecipitation	MI:0007	0.35	sequence tag identification	MI:0102	26496610	association	MI:0914	Brwd3 (association) TARS1	false	association	Brwd3 (association) TARS1
				EBI-11038544	1	true	24070|11108							false							0.35						Brwd3 (interact with) TARS1	false		Brwd3 (interact with) TARS1
unspecified role	MI:0499	bait	MI:0496	EBI-10770491|EBI-10770493		false		unspecified role	MI:0499	prey	MI:0498		EBI-10770198	true	spoke expansion	Homo sapiens transformed primary embryonal kidney cells	9606	678901	anti tag coimmunoprecipitation	MI:0007	0.35	sequence tag identification	MI:0102	26752685	association	MI:0914	OTUB1 (association) TARS1	false	association	OTUB1 (association) TARS1
unspecified role	MI:0499	bait	MI:0496	EBI-10770491|EBI-10770493		false		unspecified role	MI:0499	prey	MI:0498		EBI-10770198	true	spoke expansion	Homo sapiens transformed primary embryonal kidney cells	9606	678976	anti tag coimmunoprecipitation	MI:0007	0.35	sequence tag identification	MI:0102	26752685	association	MI:0914	OTUB1 (association) SRM	false	association	OTUB1 (association) SRM
				EBI-10770491|EBI-10770493	1	true	24076|11102							false							0.35						OTUB1 (interact with) SRM	false		OTUB1 (interact with) SRM
				EBI-10770491|EBI-10770493	1	true	24074|11104							false							0.35						OTUB1 (interact with) TARS1	false		OTUB1 (interact with) TARS1
unspecified role	MI:0499	neutral component	MI:0497			false		unspecified role	MI:0499	neutral component	MI:0497		EBI-10520328	false		Saccharomyces cerevisiae (Baker's yeast)	4932	502655	validated two hybrid	MI:1356	0.56	nucleotide sequence identification	MI:0078	25416956	physical association	MI:0915	C7orf25 (physical association) TARS1	false	physical association	C7orf25 (physical association) TARS1
unspecified role	MI:0499	bait	MI:0496			false		unspecified role	MI:0499	prey	MI:0498		EBI-10449316	false		Saccharomyces cerevisiae (Baker's yeast)	4932	454913	two hybrid array	MI:0397	0.56	nucleotide sequence identification	MI:0078	25416956	physical association	MI:0915	C7orf25 (physical association) TARS1	false	physical association	C7orf25 (physical association) TARS1
unspecified role	MI:0499	bait	MI:0496			false		unspecified role	MI:0499	prey	MI:0498		EBI-10295841	false		Saccharomyces cerevisiae (Baker's yeast)	4932	309356	two hybrid prey pooling approach	MI:1112	0.56	nucleotide sequence identification	MI:0078	25416956	physical association	MI:0915	C7orf25 (physical association) TARS1	false	physical association	C7orf25 (physical association) TARS1
					3	true	24082|24084|24086|11092|11094|11096							false							0.56						C7orf25 (interact with) TARS1	false		C7orf25 (interact with) TARS1
unspecified role	MI:0499	prey	MI:0498	EBI-761076		false		unspecified role	MI:0499	bait	MI:0496	EBI-761073	EBI-761071	false		Homo sapiens 293 cells transformed with SV40 large T antigen	9606	10814923	pull down	MI:0096	0.89	western blot	MI:0113	16189514	physical association	MI:0915	APIP (physical association) APIP	false	physical association	APIP (physical association) APIP
unspecified role	MI:0499	unspecified role	MI:0499			false		unspecified role	MI:0499	unspecified role	MI:0499		EBI-759469	false		Saccharomyces cerevisiae (Baker's yeast)	4932	10796632	two hybrid pooling approach	MI:0398	0.89	nucleotide sequence identification	MI:0078	16189514	physical association	MI:0915	APIP (physical association) APIP	false	physical association	APIP (physical association) APIP
unspecified role	MI:0499	unspecified role	MI:0499			false		unspecified role	MI:0499	unspecified role	MI:0499		EBI-756952	false		Saccharomyces cerevisiae (Baker's yeast)	4932	10766504	two hybrid pooling approach	MI:0398	0.83	nucleotide sequence identification	MI:0078	16189514	physical association	MI:0915	APIP (physical association) LNX1	false	physical association	APIP (physical association) LNX1
unspecified role	MI:0499	unspecified role	MI:0499			false		unspecified role	MI:0499	unspecified role	MI:0499		EBI-756562	false		Saccharomyces cerevisiae (Baker's yeast)	4932	10761613	two hybrid pooling approach	MI:0398	0.37	nucleotide sequence identification	MI:0078	16189514	physical association	MI:0915	APIP (physical association) VIM	false	physical association	APIP (physical association) VIM
unspecified role	MI:0499	prey	MI:0498			false		unspecified role	MI:0499	bait	MI:0496	EBI-4311564	EBI-4311559	false		Saccharomyces cerevisiae (Baker's yeast)	4932	9357556	two hybrid	MI:0018	0.37	nucleotide sequence identification	MI:0078	21382349	physical association	MI:0915	APIP (physical association) PPP1CC	false	physical association	APIP (physical association) PPP1CC
unspecified role	MI:0499	prey	MI:0498			false		unspecified role	MI:0499	bait	MI:0496	EBI-615257	EBI-365074	false		Homo sapiens transformed primary embryonal kidney cells	9606	9017412	tandem affinity purification	MI:0676	0.4	peptide massfingerprinting	MI:0082	14743216	physical association	MI:0915	APIP (physical association) TRAF2	false	physical association	APIP (physical association) TRAF2
unspecified role	MI:0499	prey	MI:0498			false		unspecified role	MI:0499	bait	MI:0496	EBI-615189	EBI-364972	false		Homo sapiens transformed primary embryonal kidney cells	9606	9016512	tandem affinity purification	MI:0676	0.4	peptide massfingerprinting	MI:0082	14743216	physical association	MI:0915	APIP (physical association) TRAF1	false	physical association	APIP (physical association) TRAF1
unspecified role	MI:0499	prey	MI:0498			false		unspecified role	MI:0499	bait	MI:0496		EBI-2875920	false		Saccharomyces cerevisiae (Baker's yeast)	4932	8677062	two hybrid pooling approach	MI:0398	0.37	nucleotide sequence identification	MI:0078	20711500	physical association	MI:0915	APIP (physical association) a0a2s9pe74_yerpe	false	physical association	APIP (physical association) a0a2s9pe74_yerpe
unspecified role	MI:0499	prey	MI:0498			false		unspecified role	MI:0499	bait	MI:0496		EBI-2875913	false		Saccharomyces cerevisiae (Baker's yeast)	4932	8677056	two hybrid pooling approach	MI:0398	0.37	nucleotide sequence identification	MI:0078	20711500	physical association	MI:0915	APIP (physical association) hpt	false	physical association	APIP (physical association) hpt
unspecified role	MI:0499	prey	MI:0498			false		unspecified role	MI:0499	bait	MI:0496		EBI-2848649	false		Saccharomyces cerevisiae (Baker's yeast)	4932	8644741	two hybrid pooling approach	MI:0398	0.37	nucleotide sequence identification	MI:0078	20711500	physical association	MI:0915	APIP (physical association) sdaA	false	physical association	APIP (physical association) sdaA
unspecified role	MI:0499	prey	MI:0498			false		unspecified role	MI:0499	bait	MI:0496		EBI-2848630	false		Saccharomyces cerevisiae (Baker's yeast)	4932	8644694	two hybrid pooling approach	MI:0398	0.37	nucleotide sequence identification	MI:0078	20711500	physical association	MI:0915	APIP (physical association) secF	false	physical association	APIP (physical association) secF
unspecified role	MI:0499	prey	MI:0498			false		unspecified role	MI:0499	bait	MI:0496		EBI-2843640	false		Saccharomyces cerevisiae (Baker's yeast)	4932	8636690	two hybrid pooling approach	MI:0398	0.37	nucleotide sequence identification	MI:0078	20711500	physical association	MI:0915	APIP (physical association) a0a5p8yj93_yerpe	false	physical association	APIP (physical association) a0a5p8yj93_yerpe
unspecified role	MI:0499	neutral component	MI:0497			false		unspecified role	MI:0499	neutral component	MI:0497		EBI-24604436	false		Saccharomyces cerevisiae (Baker's yeast)	4932	6661378	validated two hybrid	MI:1356	0.83	nucleotide sequence identification	MI:0078	32296183	physical association	MI:0915	APIP (physical association) LNX1	false	physical association	APIP (physical association) LNX1
unspecified role	MI:0499	neutral component	MI:0497			false		unspecified role	MI:0499	neutral component	MI:0497		EBI-24368743	false		Saccharomyces cerevisiae (Baker's yeast)	4932	6508282	validated two hybrid	MI:1356	0.56	nucleotide sequence identification	MI:0078	32296183	physical association	MI:0915	APIP (physical association) BAZ2B	false	physical association	APIP (physical association) BAZ2B
unspecified role	MI:0499	neutral component	MI:0497			false		unspecified role	MI:0499	neutral component	MI:0497		EBI-24347288	false		Saccharomyces cerevisiae (Baker's yeast)	4932	6491994	validated two hybrid	MI:1356	0.89	nucleotide sequence identification	MI:0078	32296183	physical association	MI:0915	APIP (physical association) APIP	false	physical association	APIP (physical association) APIP
unspecified role	MI:0499	neutral component	MI:0497			false		unspecified role	MI:0499	neutral component	MI:0497		EBI-24302333	false		Saccharomyces cerevisiae (Baker's yeast)	4932	6459790	validated two hybrid	MI:1356	0.83	nucleotide sequence identification	MI:0078	32296183	physical association	MI:0915	APIP (physical association) LNX1	false	physical association	APIP (physical association) LNX1
unspecified role	MI:0499	prey	MI:0498			false		unspecified role	MI:0499	bait	MI:0496		EBI-2351549	false		Saccharomyces cerevisiae (Baker's yeast)	4932	5698820	two hybrid pooling approach	MI:0398	0.71	nucleotide sequence identification	MI:0078	19060904	physical association	MI:0915	APIP (physical association) NUDT18	false	physical association	APIP (physical association) NUDT18
unspecified role	MI:0499	prey	MI:0498			false		unspecified role	MI:0499	bait	MI:0496		EBI-2351365	false		Saccharomyces cerevisiae (Baker's yeast)	4932	5696698	two hybrid pooling approach	MI:0398	0.49	nucleotide sequence identification	MI:0078	19060904	physical association	MI:0915	APIP (physical association) NIF3L1	false	physical association	APIP (physical association) NIF3L1
unspecified role	MI:0499	bait	MI:0496			false		unspecified role	MI:0499	prey	MI:0498		EBI-2351177	false		Saccharomyces cerevisiae (Baker's yeast)	4932	5694542	two hybrid pooling approach	MI:0398	0.89	nucleotide sequence identification	MI:0078	19060904	physical association	MI:0915	APIP (physical association) APIP	false	physical association	APIP (physical association) APIP
unspecified role	MI:0499	prey	MI:0498			false		unspecified role	MI:0499	bait	MI:0496		EBI-2350575	false		Saccharomyces cerevisiae (Baker's yeast)	4932	5687459	two hybrid array	MI:0397	0.71	predetermined participant	MI:0396	19060904	physical association	MI:0915	APIP (physical association) NUDT18	false	physical association	APIP (physical association) NUDT18
unspecified role	MI:0499	prey	MI:0498			false		unspecified role	MI:0499	bait	MI:0496		EBI-2350382	false		Saccharomyces cerevisiae (Baker's yeast)	4932	5685238	two hybrid array	MI:0397	0.49	predetermined participant	MI:0396	19060904	physical association	MI:0915	APIP (physical association) NIF3L1	false	physical association	APIP (physical association) NIF3L1
unspecified role	MI:0499	bait	MI:0496			false		unspecified role	MI:0499	prey	MI:0498		EBI-2350187	false		Saccharomyces cerevisiae (Baker's yeast)	4932	5683062	two hybrid array	MI:0397	0.89	predetermined participant	MI:0396	19060904	physical association	MI:0915	APIP (physical association) APIP	false	physical association	APIP (physical association) APIP
unspecified role	MI:0499	prey	MI:0498	EBI-22949010		false		unspecified role	MI:0499	bait	MI:0496	EBI-22949003	EBI-22948995	false		Saccharomyces cerevisiae (Baker's yeast)	4932	5213266	two hybrid array	MI:0397	0.56	nucleotide sequence identification	MI:0078	32296183	physical association	MI:0915	APIP (physical association) BAZ2B	false	physical association	APIP (physical association) BAZ2B
unspecified role	MI:0499	prey	MI:0498	EBI-22888739		false		unspecified role	MI:0499	bait	MI:0496	EBI-22888732	EBI-22888724	false		Saccharomyces cerevisiae (Baker's yeast)	4932	5151259	two hybrid array	MI:0397	0.89	nucleotide sequence identification	MI:0078	32296183	physical association	MI:0915	APIP (physical association) APIP	false	physical association	APIP (physical association) APIP
unspecified role	MI:0499	prey	MI:0498	EBI-22854385		false		unspecified role	MI:0499	bait	MI:0496	EBI-22854378	EBI-22854370	false		Saccharomyces cerevisiae (Baker's yeast)	4932	5118118	two hybrid array	MI:0397	0.56	nucleotide sequence identification	MI:0078	32296183	physical association	MI:0915	APIP (physical association) GORASP2	false	physical association	APIP (physical association) GORASP2
unspecified role	MI:0499	prey	MI:0498	EBI-22816198		false		unspecified role	MI:0499	bait	MI:0496	EBI-22816191	EBI-22816183	false		Saccharomyces cerevisiae (Baker's yeast)	4932	5081472	two hybrid array	MI:0397	0.83	nucleotide sequence identification	MI:0078	32296183	physical association	MI:0915	APIP (physical association) LNX1	false	physical association	APIP (physical association) LNX1
unspecified role	MI:0499	prey	MI:0498	EBI-22492743		false		unspecified role	MI:0499	bait	MI:0496	EBI-22492736	EBI-22492728	false		Saccharomyces cerevisiae (Baker's yeast)	4932	4911807	two hybrid prey pooling approach	MI:1112	0.56	nucleotide sequence identification	MI:0078	32296183	physical association	MI:0915	APIP (physical association) BAZ2B	false	physical association	APIP (physical association) BAZ2B
unspecified role	MI:0499	prey	MI:0498	EBI-22431746		false		unspecified role	MI:0499	bait	MI:0496	EBI-22431739	EBI-22431731	false		Saccharomyces cerevisiae (Baker's yeast)	4932	4848308	two hybrid prey pooling approach	MI:1112	0.89	nucleotide sequence identification	MI:0078	32296183	physical association	MI:0915	APIP (physical association) APIP	false	physical association	APIP (physical association) APIP
unspecified role	MI:0499	prey	MI:0498	EBI-22396811		false		unspecified role	MI:0499	bait	MI:0496	EBI-22396804	EBI-22396796	false		Saccharomyces cerevisiae (Baker's yeast)	4932	4811819	two hybrid prey pooling approach	MI:1112	0.56	nucleotide sequence identification	MI:0078	32296183	physical association	MI:0915	APIP (physical association) GORASP2	false	physical association	APIP (physical association) GORASP2
unspecified role	MI:0499	prey	MI:0498	EBI-22358257		false		unspecified role	MI:0499	bait	MI:0496	EBI-22358250	EBI-22358242	false		Saccharomyces cerevisiae (Baker's yeast)	4932	4770188	two hybrid prey pooling approach	MI:1112	0.83	nucleotide sequence identification	MI:0078	32296183	physical association	MI:0915	APIP (physical association) LNX1	false	physical association	APIP (physical association) LNX1
unspecified role	MI:0499	unspecified role	MI:0499	EBI-22144998|EBI-22144995		false		unspecified role	MI:0499	unspecified role	MI:0499		EBI-22144990	true		Saccharomyces cerevisiae (Baker's yeast)	4932	4644592	two hybrid array	MI:0397	0.67	predetermined participant	MI:0396	31515488	physical association	MI:0915	APIP (physical association) NTAQ1	false	physical association	APIP (physical association) NTAQ1
unspecified role	MI:0499	unspecified role	MI:0499	EBI-22127636|EBI-22127633		false		unspecified role	MI:0499	unspecified role	MI:0499		EBI-22127628	true		Saccharomyces cerevisiae (Baker's yeast)	4932	4617644	two hybrid array	MI:0397	0.89	predetermined participant	MI:0396	31515488	physical association	MI:0915	APIP (physical association) APIP	false	physical association	APIP (physical association) APIP
unspecified role	MI:0499	unspecified role	MI:0499	EBI-22126103|EBI-22126100		false		unspecified role	MI:0499	unspecified role	MI:0499		EBI-22126095	true		Saccharomyces cerevisiae (Baker's yeast)	4932	4615217	two hybrid array	MI:0397	0.67	predetermined participant	MI:0396	31515488	physical association	MI:0915	APIP (physical association) TNPO2	false	physical association	APIP (physical association) TNPO2
unspecified role	MI:0499	unspecified role	MI:0499	EBI-22125942|EBI-22125939		false		unspecified role	MI:0499	unspecified role	MI:0499		EBI-22125934	true		Saccharomyces cerevisiae (Baker's yeast)	4932	4614957	two hybrid array	MI:0397	0.37	predetermined participant	MI:0396	31515488	physical association	MI:0915	APIP (physical association) PDZD4	false	physical association	APIP (physical association) PDZD4
unspecified role	MI:0499	unspecified role	MI:0499	EBI-22121648|EBI-22121645		false		unspecified role	MI:0499	unspecified role	MI:0499		EBI-22121640	true		Saccharomyces cerevisiae (Baker's yeast)	4932	4608292	two hybrid array	MI:0397	0.71	predetermined participant	MI:0396	31515488	physical association	MI:0915	APIP (physical association) NUDT18	false	physical association	APIP (physical association) NUDT18
unspecified role	MI:0499	bait	MI:0496	EBI-21890946		false		unspecified role	MI:0499	prey	MI:0498		EBI-21890942	false	spoke expansion	Homo sapiens 293 cells transformed with SV40 large T antigen	9606	4475491	anti tag coimmunoprecipitation	MI:0007	0.35	sequence tag identification	MI:0102	28514442	association	MI:0914	APIP (association) VSIG8	false	association	APIP (association) VSIG8
unspecified role	MI:0499	bait	MI:0496	EBI-21890946		false		unspecified role	MI:0499	prey	MI:0498		EBI-21890942	false	spoke expansion	Homo sapiens 293 cells transformed with SV40 large T antigen	9606	4475486	anti tag coimmunoprecipitation	MI:0007	0.35	sequence tag identification	MI:0102	28514442	association	MI:0914	APIP (association) HEPHL1	false	association	APIP (association) HEPHL1
unspecified role	MI:0499	bait	MI:0496	EBI-21890946		false		unspecified role	MI:0499	prey	MI:0498		EBI-21890942	false	spoke expansion	Homo sapiens 293 cells transformed with SV40 large T antigen	9606	4475481	anti tag coimmunoprecipitation	MI:0007	0.35	sequence tag identification	MI:0102	28514442	association	MI:0914	APIP (association) LYG2	false	association	APIP (association) LYG2
unspecified role	MI:0499	bait	MI:0496	EBI-21890946		false		unspecified role	MI:0499	prey	MI:0498		EBI-21890942	false	spoke expansion	Homo sapiens 293 cells transformed with SV40 large T antigen	9606	4475476	anti tag coimmunoprecipitation	MI:0007	0.35	sequence tag identification	MI:0102	28514442	association	MI:0914	APIP (association) DSG4	false	association	APIP (association) DSG4
unspecified role	MI:0499	bait	MI:0496	EBI-21890946		false		unspecified role	MI:0499	prey	MI:0498		EBI-21890942	false	spoke expansion	Homo sapiens 293 cells transformed with SV40 large T antigen	9606	4475471	anti tag coimmunoprecipitation	MI:0007	0.35	sequence tag identification	MI:0102	28514442	association	MI:0914	APIP (association) UBA3	false	association	APIP (association) UBA3
unspecified role	MI:0499	bait	MI:0496	EBI-21890946		false		unspecified role	MI:0499	prey	MI:0498		EBI-21890942	false	spoke expansion	Homo sapiens 293 cells transformed with SV40 large T antigen	9606	4475466	anti tag coimmunoprecipitation	MI:0007	0.35	sequence tag identification	MI:0102	28514442	association	MI:0914	APIP (association) FASTKD2	false	association	APIP (association) FASTKD2
unspecified role	MI:0499	prey	MI:0498			false		unspecified role	MI:0499	bait	MI:0496		EBI-11557125	false		Saccharomyces cerevisiae (Baker's yeast)	4932	1280851	two hybrid array	MI:0397	0.56	nucleotide sequence identification	MI:0078	27107014	physical association	MI:0915	APIP (physical association) ATG8	false	physical association	APIP (physical association) ATG8
unspecified role	MI:0499	prey	MI:0498			false		unspecified role	MI:0499	bait	MI:0496		EBI-11541580	false		Saccharomyces cerevisiae (Baker's yeast)	4932	1262928	two hybrid array	MI:0397	0.56	nucleotide sequence identification	MI:0078	27107014	physical association	MI:0915	APIP (physical association) RRD1	false	physical association	APIP (physical association) RRD1
unspecified role	MI:0499	prey	MI:0498			false		unspecified role	MI:0499	bait	MI:0496		EBI-11531050	false		Saccharomyces cerevisiae (Baker's yeast)	4932	1248863	two hybrid pooling approach	MI:0398	0.56	nucleotide sequence identification	MI:0078	27107014	physical association	MI:0915	APIP (physical association) RRD1	false	physical association	APIP (physical association) RRD1
unspecified role	MI:0499	prey	MI:0498			false		unspecified role	MI:0499	bait	MI:0496		EBI-11527919	false		Saccharomyces cerevisiae (Baker's yeast)	4932	1244518	two hybrid pooling approach	MI:0398	0.56	nucleotide sequence identification	MI:0078	27107014	physical association	MI:0915	APIP (physical association) ATG8	false	physical association	APIP (physical association) ATG8
unspecified role	MI:0499	neutral component	MI:0497			false		unspecified role	MI:0499	neutral component	MI:0497		EBI-10602684	false		Saccharomyces cerevisiae (Baker's yeast)	4932	555171	validated two hybrid	MI:1356	0.67	nucleotide sequence identification	MI:0078	25416956	physical association	MI:0915	APIP (physical association) NTAQ1	false	physical association	APIP (physical association) NTAQ1
unspecified role	MI:0499	neutral component	MI:0497			false		unspecified role	MI:0499	neutral component	MI:0497		EBI-10602674	false		Saccharomyces cerevisiae (Baker's yeast)	4932	555132	validated two hybrid	MI:1356	0.89	nucleotide sequence identification	MI:0078	25416956	physical association	MI:0915	APIP (physical association) APIP	false	physical association	APIP (physical association) APIP
unspecified role	MI:0499	neutral component	MI:0497			false		unspecified role	MI:0499	neutral component	MI:0497		EBI-10602660	false		Saccharomyces cerevisiae (Baker's yeast)	4932	555127	validated two hybrid	MI:1356	0.56	nucleotide sequence identification	MI:0078	25416956	physical association	MI:0915	APIP (physical association) CFAP206	false	physical association	APIP (physical association) CFAP206
unspecified role	MI:0499	neutral component	MI:0497			false		unspecified role	MI:0499	neutral component	MI:0497		EBI-10602640	false		Saccharomyces cerevisiae (Baker's yeast)	4932	555115	validated two hybrid	MI:1356	0.56	nucleotide sequence identification	MI:0078	25416956	physical association	MI:0915	APIP (physical association) IMPDH2	false	physical association	APIP (physical association) IMPDH2
unspecified role	MI:0499	neutral component	MI:0497			false		unspecified role	MI:0499	neutral component	MI:0497		EBI-10536194	false		Saccharomyces cerevisiae (Baker's yeast)	4932	511937	validated two hybrid	MI:1356	0.56	nucleotide sequence identification	MI:0078	25416956	physical association	MI:0915	APIP (physical association) SKP1	false	physical association	APIP (physical association) SKP1
unspecified role	MI:0499	neutral component	MI:0497			false		unspecified role	MI:0499	neutral component	MI:0497		EBI-10518010	false		Saccharomyces cerevisiae (Baker's yeast)	4932	501317	validated two hybrid	MI:1356	0.56	nucleotide sequence identification	MI:0078	25416956	physical association	MI:0915	APIP (physical association) ZBTB25	false	physical association	APIP (physical association) ZBTB25
unspecified role	MI:0499	neutral component	MI:0497			false		unspecified role	MI:0499	neutral component	MI:0497		EBI-10501224	false		Saccharomyces cerevisiae (Baker's yeast)	4932	491437	validated two hybrid	MI:1356	0.67	nucleotide sequence identification	MI:0078	25416956	physical association	MI:0915	APIP (physical association) TNPO2	false	physical association	APIP (physical association) TNPO2
unspecified role	MI:0499	neutral component	MI:0497			false		unspecified role	MI:0499	neutral component	MI:0497		EBI-10500006	false		Saccharomyces cerevisiae (Baker's yeast)	4932	490717	validated two hybrid	MI:1356	0.56	nucleotide sequence identification	MI:0078	25416956	physical association	MI:0915	APIP (physical association) SDCBP	false	physical association	APIP (physical association) SDCBP
unspecified role	MI:0499	bait	MI:0496			false		unspecified role	MI:0499	prey	MI:0498		EBI-10487079	false		Saccharomyces cerevisiae (Baker's yeast)	4932	480590	two hybrid array	MI:0397	0.89	nucleotide sequence identification	MI:0078	25416956	physical association	MI:0915	APIP (physical association) APIP	false	physical association	APIP (physical association) APIP
unspecified role	MI:0499	prey	MI:0498			false		unspecified role	MI:0499	bait	MI:0496	EBI-10441507	EBI-10441493	false		Saccharomyces cerevisiae (Baker's yeast)	4932	449733	two hybrid array	MI:0397	0.67	nucleotide sequence identification	MI:0078	25416956	physical association	MI:0915	APIP (physical association) NTAQ1	false	physical association	APIP (physical association) NTAQ1
unspecified role	MI:0499	prey	MI:0498			false		unspecified role	MI:0499	bait	MI:0496		EBI-10440385	false		Saccharomyces cerevisiae (Baker's yeast)	4932	448791	two hybrid array	MI:0397	0.89	nucleotide sequence identification	MI:0078	25416956	physical association	MI:0915	APIP (physical association) APIP	false	physical association	APIP (physical association) APIP
unspecified role	MI:0499	bait	MI:0496			false		unspecified role	MI:0499	prey	MI:0498		EBI-10440365	false		Saccharomyces cerevisiae (Baker's yeast)	4932	448779	two hybrid array	MI:0397	0.56	nucleotide sequence identification	MI:0078	25416956	physical association	MI:0915	APIP (physical association) SDCBP	false	physical association	APIP (physical association) SDCBP
unspecified role	MI:0499	prey	MI:0498			false		unspecified role	MI:0499	bait	MI:0496		EBI-10418201	false		Saccharomyces cerevisiae (Baker's yeast)	4932	433240	two hybrid array	MI:0397	0.56	nucleotide sequence identification	MI:0078	25416956	physical association	MI:0915	APIP (physical association) CFAP206	false	physical association	APIP (physical association) CFAP206
unspecified role	MI:0499	prey	MI:0498			false		unspecified role	MI:0499	bait	MI:0496		EBI-10394885	false		Saccharomyces cerevisiae (Baker's yeast)	4932	412477	two hybrid array	MI:0397	0.67	nucleotide sequence identification	MI:0078	25416956	physical association	MI:0915	APIP (physical association) PDZD4	false	physical association	APIP (physical association) PDZD4
unspecified role	MI:0499	prey	MI:0498			false		unspecified role	MI:0499	bait	MI:0496		EBI-10359521	false		Saccharomyces cerevisiae (Baker's yeast)	4932	382585	two hybrid array	MI:0397	0.56	nucleotide sequence identification	MI:0078	25416956	physical association	MI:0915	APIP (physical association) PSMA1	false	physical association	APIP (physical association) PSMA1
unspecified role	MI:0499	prey	MI:0498			false		unspecified role	MI:0499	bait	MI:0496		EBI-10358805	false		Saccharomyces cerevisiae (Baker's yeast)	4932	381976	two hybrid array	MI:0397	0.56	nucleotide sequence identification	MI:0078	25416956	physical association	MI:0915	APIP (physical association) ZBTB25	false	physical association	APIP (physical association) ZBTB25
unspecified role	MI:0499	prey	MI:0498			false		unspecified role	MI:0499	bait	MI:0496		EBI-10339639	false		Saccharomyces cerevisiae (Baker's yeast)	4932	365318	two hybrid array	MI:0397	0.67	nucleotide sequence identification	MI:0078	25416956	physical association	MI:0915	APIP (physical association) TNPO2	false	physical association	APIP (physical association) TNPO2
unspecified role	MI:0499	prey	MI:0498			false		unspecified role	MI:0499	bait	MI:0496		EBI-10338551	false		Saccharomyces cerevisiae (Baker's yeast)	4932	364437	two hybrid array	MI:0397	0.56	nucleotide sequence identification	MI:0078	25416956	physical association	MI:0915	APIP (physical association) SDCBP	false	physical association	APIP (physical association) SDCBP
unspecified role	MI:0499	prey	MI:0498			false		unspecified role	MI:0499	bait	MI:0496	EBI-10287853	EBI-10287839	false		Saccharomyces cerevisiae (Baker's yeast)	4932	298694	two hybrid prey pooling approach	MI:1112	0.67	nucleotide sequence identification	MI:0078	25416956	physical association	MI:0915	APIP (physical association) NTAQ1	false	physical association	APIP (physical association) NTAQ1
unspecified role	MI:0499	bait	MI:0496			false		unspecified role	MI:0499	prey	MI:0498		EBI-10286709	false		Saccharomyces cerevisiae (Baker's yeast)	4932	297236	two hybrid prey pooling approach	MI:1112	0.89	nucleotide sequence identification	MI:0078	25416956	physical association	MI:0915	APIP (physical association) APIP	false	physical association	APIP (physical association) APIP
unspecified role	MI:0499	bait	MI:0496			false		unspecified role	MI:0499	prey	MI:0498		EBI-10286699	false		Saccharomyces cerevisiae (Baker's yeast)	4932	297230	two hybrid prey pooling approach	MI:1112	0.56	nucleotide sequence identification	MI:0078	25416956	physical association	MI:0915	APIP (physical association) IMPDH2	false	physical association	APIP (physical association) IMPDH2
unspecified role	MI:0499	bait	MI:0496			false		unspecified role	MI:0499	prey	MI:0498		EBI-10286689	false		Saccharomyces cerevisiae (Baker's yeast)	4932	297190	two hybrid prey pooling approach	MI:1112	0.56	nucleotide sequence identification	MI:0078	25416956	physical association	MI:0915	APIP (physical association) SDCBP	false	physical association	APIP (physical association) SDCBP
unspecified role	MI:0499	prey	MI:0498			false		unspecified role	MI:0499	bait	MI:0496		EBI-10272963	false		Saccharomyces cerevisiae (Baker's yeast)	4932	278438	two hybrid prey pooling approach	MI:1112	0.83	nucleotide sequence identification	MI:0078	25416956	physical association	MI:0915	APIP (physical association) LNX1	false	physical association	APIP (physical association) LNX1
unspecified role	MI:0499	prey	MI:0498			false		unspecified role	MI:0499	bait	MI:0496		EBI-10239062	false		Saccharomyces cerevisiae (Baker's yeast)	4932	235917	two hybrid prey pooling approach	MI:1112	0.67	nucleotide sequence identification	MI:0078	25416956	physical association	MI:0915	APIP (physical association) PDZD4	false	physical association	APIP (physical association) PDZD4
unspecified role	MI:0499	prey	MI:0498			false		unspecified role	MI:0499	bait	MI:0496		EBI-10180476	false		Saccharomyces cerevisiae (Baker's yeast)	4932	148909	two hybrid prey pooling approach	MI:1112	0.56	nucleotide sequence identification	MI:0078	25416956	physical association	MI:0915	APIP (physical association) SDCBP	false	physical association	APIP (physical association) SDCBP
unspecified role	MI:0499	prey	MI:0498			false		unspecified role	MI:0499	bait	MI:0496		EBI-10201553	false		Saccharomyces cerevisiae (Baker's yeast)	4932	187224	two hybrid prey pooling approach	MI:1112	0.56	nucleotide sequence identification	MI:0078	25416956	physical association	MI:0915	APIP (physical association) ZBTB25	false	physical association	APIP (physical association) ZBTB25
				EBI-761076|EBI-22888739|EBI-22127633|EBI-22431746|EBI-22127636	12	true	24090|24092|24118|24126|24132|24136|24144|24152|24182|24196|24200|24218|10960|10978|10982|10996|11026|11034|11042|11046|11052|11060|11086|11088					EBI-761073|EBI-22431739|EBI-22888732		false							0.89						APIP (interact with) APIP	false		APIP (interact with) APIP
				EBI-22358257|EBI-23573274|EBI-22816198|EBI-25129070	11	true	24094|24288|24114|24120|24290|24140|24148|24292|24294|24296|24224|10882|10884|10886|10888|10890|10954|11030|11038|11058|11064|11084					EBI-22816191|EBI-25129077|EBI-23573281|EBI-22358250|EBI-22270116		false							0.83						APIP (interact with) LNX1	false		APIP (interact with) LNX1
					1	true	24096|11082							false							0.37						APIP (interact with) VIM	false		APIP (interact with) VIM
					1	true	24098|11080					EBI-4311564		false							0.37						APIP (interact with) PPP1CC	false		APIP (interact with) PPP1CC
					1	true	24100|11078					EBI-615257		false							0.4						APIP (interact with) TRAF2	false		APIP (interact with) TRAF2
					1	true	24102|11076					EBI-615189		false							0.4						APIP (interact with) TRAF1	false		APIP (interact with) TRAF1
					1	true	24104|11074							false							0.37						APIP (interact with) a0a2s9pe74_yerpe	false		APIP (interact with) a0a2s9pe74_yerpe
					1	true	24106|11072							false							0.37						APIP (interact with) hpt	false		APIP (interact with) hpt
					1	true	24108|11070							false							0.37						APIP (interact with) sdaA	false		APIP (interact with) sdaA
					1	true	24110|11068							false							0.37						APIP (interact with) secF	false		APIP (interact with) secF
					1	true	24112|11066							false							0.37						APIP (interact with) a0a5p8yj93_yerpe	false		APIP (interact with) a0a5p8yj93_yerpe
				EBI-22492743|EBI-22949010	3	true	24116|24134|24142|11036|11044|11062					EBI-22492736|EBI-22949003		false							0.56						APIP (interact with) BAZ2B	false		APIP (interact with) BAZ2B
					2	true	24124|24130|11048|11054							false							0.49						APIP (interact with) NIF3L1	false		APIP (interact with) NIF3L1
				EBI-22144995|EBI-22144998	5	true	24150|24350|24180|24198|24216|10828|10962|10980|10998|11028					EBI-10287853|EBI-22137540|EBI-10441507		false							0.67						APIP (interact with) NTAQ1	false		APIP (interact with) NTAQ1
				EBI-22126100|EBI-22126103	4	true	24154|24192|24212|24356|10822|10966|10986|11024							false							0.67						APIP (interact with) TNPO2	false		APIP (interact with) TNPO2
				EBI-22125939|EBI-22125942	1	true	24156|11022							false							0.37						APIP (interact with) PDZD4	false		APIP (interact with) PDZD4
				EBI-21890946	1	true	24160|11018							false							0.35						APIP (interact with) VSIG8	false		APIP (interact with) VSIG8
				EBI-21890946	1	true	24162|11016							false							0.35						APIP (interact with) HEPHL1	false		APIP (interact with) HEPHL1
				EBI-21890946	1	true	24164|11014							false							0.35						APIP (interact with) LYG2	false		APIP (interact with) LYG2
				EBI-21890946	1	true	24166|11012							false							0.35						APIP (interact with) DSG4	false		APIP (interact with) DSG4
				EBI-21890946	1	true	24168|11010							false							0.35						APIP (interact with) UBA3	false		APIP (interact with) UBA3
				EBI-21890946	1	true	24170|11008							false							0.35						APIP (interact with) FASTKD2	false		APIP (interact with) FASTKD2
					3	true	24172|24376|24178|10802|11000|11006							false							0.56						APIP (interact with) ATG8	false		APIP (interact with) ATG8
					3	true	24184|24204|24402|10776|10974|10994							false							0.56						APIP (interact with) CFAP206	false		APIP (interact with) CFAP206
					3	true	24186|24410|24220|10768|10958|10992							false							0.56						APIP (interact with) IMPDH2	false		APIP (interact with) IMPDH2
					3	true	24188|24412|24414|10764|10766|10990							false							0.56						APIP (interact with) SKP1	false		APIP (interact with) SKP1
					3	true	24190|24210|24230|10948|10968|10988							false							0.56						APIP (interact with) ZBTB25	false		APIP (interact with) ZBTB25
					5	true	24194|24202|24214|24222|24228|10950|10956|10964|10976|10984							false							0.56						APIP (interact with) SDCBP	false		APIP (interact with) SDCBP
unspecified role	MI:0499	prey	MI:0498	EBI-25129077		false		unspecified role	MI:0499	bait	MI:0496	EBI-25129070	EBI-25129062	false		Saccharomyces cerevisiae (Baker's yeast)	4932	7117337	two hybrid prey pooling approach	MI:1112	0.83	nucleotide sequence identification	MI:0078	32296183	physical association	MI:0915	LNX1 (physical association) APIP	false	physical association	LNX1 (physical association) APIP
unspecified role	MI:0499	prey	MI:0498	EBI-23573281		false		unspecified role	MI:0499	bait	MI:0496	EBI-23573274	EBI-23573266	false		Saccharomyces cerevisiae (Baker's yeast)	4932	5762032	two hybrid array	MI:0397	0.83	nucleotide sequence identification	MI:0078	32296183	physical association	MI:0915	LNX1 (physical association) APIP	false	physical association	LNX1 (physical association) APIP
unspecified role	MI:0499	prey	MI:0498	EBI-22270116		false		unspecified role	MI:0499	bait	MI:0496		EBI-22270112	true		Saccharomyces cerevisiae (Baker's yeast)	4932	4697106	two hybrid array	MI:0397	0.83	predetermined participant	MI:0396	29892012	physical association	MI:0915	LNX1 (physical association) APIP	false	physical association	LNX1 (physical association) APIP
unspecified role	MI:0499	neutral component	MI:0497			false		unspecified role	MI:0499	neutral component	MI:0497		EBI-10593516	false		Saccharomyces cerevisiae (Baker's yeast)	4932	545765	validated two hybrid	MI:1356	0.83	nucleotide sequence identification	MI:0078	25416956	physical association	MI:0915	LNX1 (physical association) APIP	false	physical association	LNX1 (physical association) APIP
unspecified role	MI:0499	bait	MI:0496			false		unspecified role	MI:0499	prey	MI:0498		EBI-10427097	false		Saccharomyces cerevisiae (Baker's yeast)	4932	439995	two hybrid array	MI:0397	0.83	nucleotide sequence identification	MI:0078	25416956	physical association	MI:0915	LNX1 (physical association) APIP	false	physical association	LNX1 (physical association) APIP
unspecified role	MI:0499	unspecified role	MI:0499			false		unspecified role	MI:0499	unspecified role	MI:0499		EBI-756619	false		Saccharomyces cerevisiae (Baker's yeast)	4932	10762280	two hybrid pooling approach	MI:0398	0.37	nucleotide sequence identification	MI:0078	16189514	physical association	MI:0915	VPS25 (physical association) APIP	false	physical association	VPS25 (physical association) APIP
					1	true	24298|10880							false							0.37						VPS25 (interact with) APIP	false		VPS25 (interact with) APIP
unspecified role	MI:0499	unspecified role	MI:0499			false		unspecified role	MI:0499	unspecified role	MI:0499		EBI-755242	false		Saccharomyces cerevisiae (Baker's yeast)	4932	10746890	two hybrid pooling approach	MI:0398	0.71	nucleotide sequence identification	MI:0078	16189514	physical association	MI:0915	NUDT18 (physical association) APIP	false	physical association	NUDT18 (physical association) APIP
					4	true	24302|24122|24128|24158|10876|11020|11050|11056					EBI-22121648|EBI-22121645		false							0.71						NUDT18 (interact with) APIP	false		NUDT18 (interact with) APIP
unspecified role	MI:0499	prey	MI:0498	EBI-24832675		false		unspecified role	MI:0499	bait	MI:0496	EBI-24832668	EBI-24832660	false		Saccharomyces cerevisiae (Baker's yeast)	4932	6827287	two hybrid prey pooling approach	MI:1112	0.56	nucleotide sequence identification	MI:0078	32296183	physical association	MI:0915	TRAF2 (physical association) FARS2	false	physical association	TRAF2 (physical association) FARS2
unspecified role	MI:0499	neutral component	MI:0497			false		unspecified role	MI:0499	neutral component	MI:0497		EBI-24379397	false		Saccharomyces cerevisiae (Baker's yeast)	4932	6516256	validated two hybrid	MI:1356	0.56	nucleotide sequence identification	MI:0078	32296183	physical association	MI:0915	TRAF2 (physical association) FARS2	false	physical association	TRAF2 (physical association) FARS2
unspecified role	MI:0499	prey	MI:0498	EBI-22966151		false		unspecified role	MI:0499	bait	MI:0496	EBI-22966144	EBI-22966136	false		Saccharomyces cerevisiae (Baker's yeast)	4932	5232963	two hybrid array	MI:0397	0.56	nucleotide sequence identification	MI:0078	32296183	physical association	MI:0915	TRAF2 (physical association) FARS2	false	physical association	TRAF2 (physical association) FARS2
unspecified role	MI:0499	prey	MI:0498	EBI-24925194		false		unspecified role	MI:0499	bait	MI:0496	EBI-24925187	EBI-24925179	false		Saccharomyces cerevisiae (Baker's yeast)	4932	6916534	two hybrid prey pooling approach	MI:1112	0.78	nucleotide sequence identification	MI:0078	32296183	physical association	MI:0915	TRAF2 (physical association) AASDHPPT	false	physical association	TRAF2 (physical association) AASDHPPT
unspecified role	MI:0499	prey	MI:0498	EBI-23057496		false		unspecified role	MI:0499	bait	MI:0496	EBI-23057489	EBI-23057481	false		Saccharomyces cerevisiae (Baker's yeast)	4932	5329361	two hybrid array	MI:0397	0.78	nucleotide sequence identification	MI:0078	32296183	physical association	MI:0915	TRAF2 (physical association) AASDHPPT	false	physical association	TRAF2 (physical association) AASDHPPT
unspecified role	MI:0499	prey	MI:0498			false		unspecified role	MI:0499	bait	MI:0496		EBI-10465867	false		Saccharomyces cerevisiae (Baker's yeast)	4932	465502	two hybrid array	MI:0397	0.78	nucleotide sequence identification	MI:0078	25416956	physical association	MI:0915	TRAF2 (physical association) AASDHPPT	false	physical association	TRAF2 (physical association) AASDHPPT
unspecified role	MI:0499	prey	MI:0498			false		unspecified role	MI:0499	bait	MI:0496		EBI-10312868	false		Saccharomyces cerevisiae (Baker's yeast)	4932	333553	two hybrid prey pooling approach	MI:1112	0.78	nucleotide sequence identification	MI:0078	25416956	physical association	MI:0915	TRAF2 (physical association) AASDHPPT	false	physical association	TRAF2 (physical association) AASDHPPT
				EBI-24832675|EBI-22966151	3	true	24306|24308|24310|10868|10870|10872					EBI-24832668|EBI-22966144		false							0.56						TRAF2 (interact with) FARS2	false		TRAF2 (interact with) FARS2
unspecified role	MI:0499	bait	MI:0496			false		unspecified role	MI:0499	prey	MI:0498		EBI-2875927	false		Saccharomyces cerevisiae (Baker's yeast)	4932	8677068	two hybrid pooling approach	MI:0398	0.37	nucleotide sequence identification	MI:0078	20711500	physical association	MI:0915	q0wjq7_yerpe (physical association) APIP	false	physical association	q0wjq7_yerpe (physical association) APIP
					1	true	24322|10856							false							0.37						q0wjq7_yerpe (interact with) APIP	false		q0wjq7_yerpe (interact with) APIP
unspecified role	MI:0499	bait	MI:0496			false		unspecified role	MI:0499	prey	MI:0498		EBI-2848642	false		Saccharomyces cerevisiae (Baker's yeast)	4932	8644721	two hybrid pooling approach	MI:0398	0.37	nucleotide sequence identification	MI:0078	20711500	physical association	MI:0915	dmsC2 (physical association) APIP	false	physical association	dmsC2 (physical association) APIP
					1	true	24326|10852							false							0.37						dmsC2 (interact with) APIP	false		dmsC2 (interact with) APIP
unspecified role	MI:0499	bait	MI:0496			false		unspecified role	MI:0499	prey	MI:0498		EBI-2808881	false		Saccharomyces cerevisiae (Baker's yeast)	4932	8588007	two hybrid pooling approach	MI:0398	0.37	nucleotide sequence identification	MI:0078	20711500	physical association	MI:0915	wbtM (physical association) APIP	false	physical association	wbtM (physical association) APIP
					1	true	24330|10848							false							0.37						wbtM (interact with) APIP	false		wbtM (interact with) APIP
unspecified role	MI:0499	neutral component	MI:0497			false		unspecified role	MI:0499	neutral component	MI:0497		EBI-26201140	false		Saccharomyces cerevisiae (Baker's yeast)	4932	7932808	validated two hybrid	MI:1356	0.56	predetermined participant	MI:0396	32814053	physical association	MI:0915	SMN1 (physical association) APIP	false	physical association	SMN1 (physical association) APIP
unspecified role	MI:0499	bait	MI:0496			false		unspecified role	MI:0499	prey	MI:0498		EBI-26046993	false		Saccharomyces cerevisiae (Baker's yeast)	4932	7760527	two hybrid pooling approach	MI:0398	0.56	predetermined participant	MI:0396	32814053	physical association	MI:0915	SMN1 (physical association) APIP	false	physical association	SMN1 (physical association) APIP
unspecified role	MI:0499	bait	MI:0496			false		unspecified role	MI:0499	prey	MI:0498		EBI-25891778	false		Saccharomyces cerevisiae (Baker's yeast)	4932	7601926	two hybrid array	MI:0397	0.56	predetermined participant	MI:0396	32814053	physical association	MI:0915	SMN1 (physical association) APIP	false	physical association	SMN1 (physical association) APIP
					3	true	24334|24336|24338|10840|10842|10844							false							0.56						SMN1 (interact with) APIP	false		SMN1 (interact with) APIP
unspecified role	MI:0499	neutral component	MI:0497			false		unspecified role	MI:0499	neutral component	MI:0497		EBI-24325959	false		Saccharomyces cerevisiae (Baker's yeast)	4932	6476829	validated two hybrid	MI:1356	0.56	nucleotide sequence identification	MI:0078	32296183	physical association	MI:0915	GORASP2 (physical association) APIP	false	physical association	GORASP2 (physical association) APIP
unspecified role	MI:0499	prey	MI:0498			false		unspecified role	MI:0499	bait	MI:0496	EBI-27113725	EBI-27113721	false		human-Flp-In T-REx 293	9606	8535073	anti tag coimmunoprecipitation	MI:0007	0.4	sequence tag identification	MI:0102	27880917	physical association	MI:0915	GORASP2 (physical association) PGP	false	physical association	GORASP2 (physical association) PGP
					1	true	24344|10834					EBI-27113725		false							0.4						GORASP2 (interact with) PGP	false		GORASP2 (interact with) PGP
				EBI-22854378|EBI-22396804	3	true	24342|24138|24146|10836|11032|11040					EBI-22854385|EBI-22396811		false							0.56						GORASP2 (interact with) APIP	false		GORASP2 (interact with) APIP
unspecified role	MI:0499	unspecified role	MI:0499	EBI-22137540		false		unspecified role	MI:0499	unspecified role	MI:0499		EBI-22137535	true		Saccharomyces cerevisiae (Baker's yeast)	4932	4633330	two hybrid array	MI:0397	0.67	predetermined participant	MI:0396	31515488	physical association	MI:0915	NTAQ1 (physical association) APIP	false	physical association	NTAQ1 (physical association) APIP
unspecified role	MI:0499	neutral component	MI:0497			false		unspecified role	MI:0499	neutral component	MI:0497		EBI-24621957	false		Saccharomyces cerevisiae (Baker's yeast)	4932	6673685	validated two hybrid	MI:1356	0.56	nucleotide sequence identification	MI:0078	32296183	physical association	MI:0915	NTAQ1 (physical association) AOC1	false	physical association	NTAQ1 (physical association) AOC1
				EBI-23603792|EBI-23379415	3	true	24352|31754|31766|3412|3424|10826					EBI-23379422|EBI-23603799		false							0.56						NTAQ1 (interact with) AOC1	false		NTAQ1 (interact with) AOC1
unspecified role	MI:0499	bait	MI:0496			false		unspecified role	MI:0499	prey	MI:0498		EBI-10181632	false		Saccharomyces cerevisiae (Baker's yeast)	4932	151345	two hybrid prey pooling approach	MI:1112	0.67	nucleotide sequence identification	MI:0078	25416956	physical association	MI:0915	TNPO2 (physical association) APIP	false	physical association	TNPO2 (physical association) APIP
unspecified role	MI:0499	unspecified role	MI:0499	EBI-22123915		false		unspecified role	MI:0499	unspecified role	MI:0499		EBI-22123910	true		Saccharomyces cerevisiae (Baker's yeast)	4932	4611840	two hybrid array	MI:0397	0.67	predetermined participant	MI:0396	31515488	physical association	MI:0915	PDZD4 (physical association) APIP	false	physical association	PDZD4 (physical association) APIP
unspecified role	MI:0499	neutral component	MI:0497			false		unspecified role	MI:0499	neutral component	MI:0497		EBI-10557212	false		Saccharomyces cerevisiae (Baker's yeast)	4932	524237	validated two hybrid	MI:1356	0.67	nucleotide sequence identification	MI:0078	25416956	physical association	MI:0915	PDZD4 (physical association) APIP	false	physical association	PDZD4 (physical association) APIP
				EBI-22123915	4	true	24358|24360|24206|24226|10818|10820|10952|10972							false							0.67						PDZD4 (interact with) APIP	false		PDZD4 (interact with) APIP
unspecified role	MI:0499	bait	MI:0496	EBI-21785104		false		unspecified role	MI:0499	prey	MI:0498		EBI-21785100	false	spoke expansion	Homo sapiens 293 cells transformed with SV40 large T antigen	9606	4369604	anti tag coimmunoprecipitation	MI:0007	0.35	sequence tag identification	MI:0102	28514442	association	MI:0914	FASTKD2 (association) YARS2	false	association	FASTKD2 (association) YARS2
				EBI-21785104	1	true	24364|10814							false							0.35						FASTKD2 (interact with) YARS2	false		FASTKD2 (interact with) YARS2
unspecified role	MI:0499	bait	MI:0496	EBI-21623169		false		unspecified role	MI:0499	prey	MI:0498		EBI-21623165	false	spoke expansion	Homo sapiens 293 cells transformed with SV40 large T antigen	9606	4220079	anti tag coimmunoprecipitation	MI:0007	0.35	sequence tag identification	MI:0102	28514442	association	MI:0914	ISOC2 (association) APIP	false	association	ISOC2 (association) APIP
				EBI-21623169	1	true	24368|10810							false							0.35						ISOC2 (interact with) APIP	false		ISOC2 (interact with) APIP
unspecified role	MI:0499	bait	MI:0496	EBI-20623421		false		unspecified role	MI:0499	prey	MI:0498		EBI-20623276	false	spoke expansion	Homo sapiens epitheloid cervix carcinoma cells	9606	3565841	pull down	MI:0096	0.35	sequence tag identification	MI:0102	26382858	association	MI:0914	NCBP3 (association) APIP	false	association	NCBP3 (association) APIP
				EBI-20623421	1	true	24372|10806							false							0.35						NCBP3 (interact with) APIP	false		NCBP3 (interact with) APIP
unspecified role	MI:0499	neutral component	MI:0497			false		unspecified role	MI:0499	neutral component	MI:0497		EBI-11553656	false		Saccharomyces cerevisiae (Baker's yeast)	4932	1277054	validated two hybrid	MI:1356	0.56	predetermined participant	MI:0396	27107014	physical association	MI:0915	ATG8 (physical association) APIP	false	physical association	ATG8 (physical association) APIP
unspecified role	MI:0499	neutral component	MI:0497			false		unspecified role	MI:0499	neutral component	MI:0497		EBI-11553660	false		Saccharomyces cerevisiae (Baker's yeast)	4932	1277060	validated two hybrid	MI:1356	0.56	predetermined participant	MI:0396	27107014	physical association	MI:0915	RRD1 (physical association) APIP	false	physical association	RRD1 (physical association) APIP
					3	true	24378|24174|24176|10800|11002|11004							false							0.56						RRD1 (interact with) APIP	false		RRD1 (interact with) APIP
unspecified role	MI:0499	bait	MI:0496	EBI-11121198		false		unspecified role	MI:0499	prey	MI:0498		EBI-11121111	false	spoke expansion	Homo sapiens epitheloid cervix carcinoma cells	9606	953090	anti tag coimmunoprecipitation	MI:0007	0.35	sequence tag identification	MI:0102	26496610	association	MI:0914	Emc6 (association) APIP	false	association	Emc6 (association) APIP
				EBI-11121198	1	true	24382|10796							false							0.35						Emc6 (interact with) APIP	false		Emc6 (interact with) APIP
unspecified role	MI:0499	bait	MI:0496	EBI-11040898		false		unspecified role	MI:0499	prey	MI:0498		EBI-11040866	false	spoke expansion	Homo sapiens epitheloid cervix carcinoma cells	9606	856421	anti tag coimmunoprecipitation	MI:0007	0.35	sequence tag identification	MI:0102	26496610	association	MI:0914	NDE1 (association) APIP	false	association	NDE1 (association) APIP
				EBI-11040898	1	true	24386|10792							false							0.35						NDE1 (interact with) APIP	false		NDE1 (interact with) APIP
unspecified role	MI:0499	bait	MI:0496	EBI-10992818		false		unspecified role	MI:0499	prey	MI:0498		EBI-10992461	false	spoke expansion	Homo sapiens epitheloid cervix carcinoma cells	9606	767002	anti tag coimmunoprecipitation	MI:0007	0.35	sequence tag identification	MI:0102	26496610	association	MI:0914	Dctn3 (association) APIP	false	association	Dctn3 (association) APIP
				EBI-10992818	1	true	24390|10788							false							0.35						Dctn3 (interact with) APIP	false		Dctn3 (interact with) APIP
unspecified role	MI:0499	neutral component	MI:0497			false		unspecified role	MI:0499	neutral component	MI:0497		EBI-10602696	false		Saccharomyces cerevisiae (Baker's yeast)	4932	555177	validated two hybrid	MI:1356	0.56	nucleotide sequence identification	MI:0078	25416956	physical association	MI:0915	TSC22D4 (physical association) APIP	false	physical association	TSC22D4 (physical association) APIP
unspecified role	MI:0499	bait	MI:0496			false		unspecified role	MI:0499	prey	MI:0498		EBI-10480603	false		Saccharomyces cerevisiae (Baker's yeast)	4932	475036	two hybrid array	MI:0397	0.56	nucleotide sequence identification	MI:0078	25416956	physical association	MI:0915	TSC22D4 (physical association) APIP	false	physical association	TSC22D4 (physical association) APIP
unspecified role	MI:0499	bait	MI:0496			false		unspecified role	MI:0499	prey	MI:0498		EBI-10327964	false		Saccharomyces cerevisiae (Baker's yeast)	4932	353747	two hybrid prey pooling approach	MI:1112	0.56	nucleotide sequence identification	MI:0078	25416956	physical association	MI:0915	TSC22D4 (physical association) APIP	false	physical association	TSC22D4 (physical association) APIP
					3	true	24394|24396|24398|10780|10782|10784							false							0.56						TSC22D4 (interact with) APIP	false		TSC22D4 (interact with) APIP
unspecified role	MI:0499	bait	MI:0496			false		unspecified role	MI:0499	prey	MI:0498		EBI-10263726	false		Saccharomyces cerevisiae (Baker's yeast)	4932	266637	two hybrid prey pooling approach	MI:1112	0.56	nucleotide sequence identification	MI:0078	25416956	physical association	MI:0915	CFAP206 (physical association) APIP	false	physical association	CFAP206 (physical association) APIP
unspecified role	MI:0499	neutral component	MI:0497			false		unspecified role	MI:0499	neutral component	MI:0497		EBI-10602650	false		Saccharomyces cerevisiae (Baker's yeast)	4932	555121	validated two hybrid	MI:1356	0.56	nucleotide sequence identification	MI:0078	25416956	physical association	MI:0915	PSMA1 (physical association) APIP	false	physical association	PSMA1 (physical association) APIP
unspecified role	MI:0499	bait	MI:0496			false		unspecified role	MI:0499	prey	MI:0498		EBI-10202284	false		Saccharomyces cerevisiae (Baker's yeast)	4932	188072	two hybrid prey pooling approach	MI:1112	0.56	nucleotide sequence identification	MI:0078	25416956	physical association	MI:0915	PSMA1 (physical association) APIP	false	physical association	PSMA1 (physical association) APIP
					3	true	24404|24208|24406|10772|10774|10970							false							0.56						PSMA1 (interact with) APIP	false		PSMA1 (interact with) APIP
unspecified role	MI:0499	prey	MI:0498			false		unspecified role	MI:0499	bait	MI:0496		EBI-10440375	false		Saccharomyces cerevisiae (Baker's yeast)	4932	448785	two hybrid array	MI:0397	0.56	nucleotide sequence identification	MI:0078	25416956	physical association	MI:0915	IMPDH2 (physical association) APIP	false	physical association	IMPDH2 (physical association) APIP
unspecified role	MI:0499	bait	MI:0496			false		unspecified role	MI:0499	prey	MI:0498		EBI-10377156	false		Saccharomyces cerevisiae (Baker's yeast)	4932	396978	two hybrid array	MI:0397	0.56	nucleotide sequence identification	MI:0078	25416956	physical association	MI:0915	SKP1 (physical association) APIP	false	physical association	SKP1 (physical association) APIP
unspecified role	MI:0499	bait	MI:0496			false		unspecified role	MI:0499	prey	MI:0498		EBI-10220669	false		Saccharomyces cerevisiae (Baker's yeast)	4932	212753	two hybrid prey pooling approach	MI:1112	0.56	nucleotide sequence identification	MI:0078	25416956	physical association	MI:0915	SKP1 (physical association) APIP	false	physical association	SKP1 (physical association) APIP
unspecified role	MI:0499	bait	MI:0496	EBI-8643713		false		unspecified role	MI:0499	prey	MI:0498	EBI-8643710	EBI-8643699	false		Saccharomyces cerevisiae	559292	11646818	two hybrid	MI:0018	0.67	predetermined participant	MI:0396	21516116	physical association	MI:0915	TXNDC9 (physical association) MAGEA6	false	physical association	TXNDC9 (physical association) MAGEA6
unspecified role	MI:0499	bait	MI:0496	EBI-707564		false		unspecified role	MI:0499	prey	MI:0498	EBI-707552	EBI-707550	false		Chlorocebus aethiops COS-1 cells	9534	10244507	anti tag coimmunoprecipitation	MI:0007	0.51	western blot	MI:0113	16169070	physical association	MI:0915	TXNDC9 (physical association) FEZ1	false	physical association	TXNDC9 (physical association) FEZ1
unspecified role	MI:0499	prey	MI:0498			false		unspecified role	MI:0499	bait	MI:0496	EBI-21688156	EBI-21688152	false		Homo sapiens 293 cells transformed with SV40 large T antigen	9606	4279526	anti tag coimmunoprecipitation	MI:0007	0.4	sequence tag identification	MI:0102	28514442	physical association	MI:0915	TXNDC9 (physical association) TMEM132E-DT	false	physical association	TXNDC9 (physical association) TMEM132E-DT
unspecified role	MI:0499	bait	MI:0496	EBI-21558248		false		unspecified role	MI:0499	prey	MI:0498		EBI-21558244	false	spoke expansion	Homo sapiens 293 cells transformed with SV40 large T antigen	9606	4159399	anti tag coimmunoprecipitation	MI:0007	0.35	sequence tag identification	MI:0102	28514442	association	MI:0914	TXNDC9 (association) TUBAL3	false	association	TXNDC9 (association) TUBAL3
unspecified role	MI:0499	bait	MI:0496	EBI-21558248		false		unspecified role	MI:0499	prey	MI:0498		EBI-21558244	false	spoke expansion	Homo sapiens 293 cells transformed with SV40 large T antigen	9606	4159394	anti tag coimmunoprecipitation	MI:0007	0.35	sequence tag identification	MI:0102	28514442	association	MI:0914	TXNDC9 (association) TCP1	false	association	TXNDC9 (association) TCP1
unspecified role	MI:0499	bait	MI:0496	EBI-21558248		false		unspecified role	MI:0499	prey	MI:0498		EBI-21558244	false	spoke expansion	Homo sapiens 293 cells transformed with SV40 large T antigen	9606	4159389	anti tag coimmunoprecipitation	MI:0007	0.35	sequence tag identification	MI:0102	28514442	association	MI:0914	TXNDC9 (association) CCT6A	false	association	TXNDC9 (association) CCT6A
unspecified role	MI:0499	bait	MI:0496	EBI-21558248		false		unspecified role	MI:0499	prey	MI:0498		EBI-21558244	false	spoke expansion	Homo sapiens 293 cells transformed with SV40 large T antigen	9606	4159384	anti tag coimmunoprecipitation	MI:0007	0.35	sequence tag identification	MI:0102	28514442	association	MI:0914	TXNDC9 (association) CCT5	false	association	TXNDC9 (association) CCT5
unspecified role	MI:0499	bait	MI:0496	EBI-21558248		false		unspecified role	MI:0499	prey	MI:0498		EBI-21558244	false	spoke expansion	Homo sapiens 293 cells transformed with SV40 large T antigen	9606	4159379	anti tag coimmunoprecipitation	MI:0007	0.35	sequence tag identification	MI:0102	28514442	association	MI:0914	TXNDC9 (association) CCT3	false	association	TXNDC9 (association) CCT3
unspecified role	MI:0499	bait	MI:0496	EBI-21558248		false		unspecified role	MI:0499	prey	MI:0498		EBI-21558244	false	spoke expansion	Homo sapiens 293 cells transformed with SV40 large T antigen	9606	4159374	anti tag coimmunoprecipitation	MI:0007	0.35	sequence tag identification	MI:0102	28514442	association	MI:0914	TXNDC9 (association) GNB2	false	association	TXNDC9 (association) GNB2
unspecified role	MI:0499	bait	MI:0496	EBI-21558248		false		unspecified role	MI:0499	prey	MI:0498		EBI-21558244	false	spoke expansion	Homo sapiens 293 cells transformed with SV40 large T antigen	9606	4159369	anti tag coimmunoprecipitation	MI:0007	0.35	sequence tag identification	MI:0102	28514442	association	MI:0914	TXNDC9 (association) TUBA4A	false	association	TXNDC9 (association) TUBA4A
unspecified role	MI:0499	bait	MI:0496	EBI-21558248		false		unspecified role	MI:0499	prey	MI:0498		EBI-21558244	false	spoke expansion	Homo sapiens 293 cells transformed with SV40 large T antigen	9606	4159364	anti tag coimmunoprecipitation	MI:0007	0.35	sequence tag identification	MI:0102	28514442	association	MI:0914	TXNDC9 (association) CCT2	false	association	TXNDC9 (association) CCT2
unspecified role	MI:0499	bait	MI:0496	EBI-21558248		false		unspecified role	MI:0499	prey	MI:0498		EBI-21558244	false	spoke expansion	Homo sapiens 293 cells transformed with SV40 large T antigen	9606	4159359	anti tag coimmunoprecipitation	MI:0007	0.67	sequence tag identification	MI:0102	28514442	association	MI:0914	TXNDC9 (association) TUBA1A	false	association	TXNDC9 (association) TUBA1A
unspecified role	MI:0499	bait	MI:0496	EBI-21558248		false		unspecified role	MI:0499	prey	MI:0498		EBI-21558244	false	spoke expansion	Homo sapiens 293 cells transformed with SV40 large T antigen	9606	4159354	anti tag coimmunoprecipitation	MI:0007	0.35	sequence tag identification	MI:0102	28514442	association	MI:0914	TXNDC9 (association) CCT7	false	association	TXNDC9 (association) CCT7
unspecified role	MI:0499	bait	MI:0496	EBI-21558248		false		unspecified role	MI:0499	prey	MI:0498		EBI-21558244	false	spoke expansion	Homo sapiens 293 cells transformed with SV40 large T antigen	9606	4159349	anti tag coimmunoprecipitation	MI:0007	0.53	sequence tag identification	MI:0102	28514442	association	MI:0914	TXNDC9 (association) TUBA1C	false	association	TXNDC9 (association) TUBA1C
unspecified role	MI:0499	bait	MI:0496	EBI-21558248		false		unspecified role	MI:0499	prey	MI:0498		EBI-21558244	false	spoke expansion	Homo sapiens 293 cells transformed with SV40 large T antigen	9606	4159344	anti tag coimmunoprecipitation	MI:0007	0.35	sequence tag identification	MI:0102	28514442	association	MI:0914	TXNDC9 (association) SMYD2	false	association	TXNDC9 (association) SMYD2
unspecified role	MI:0499	neutral component	MI:0497			false		unspecified role	MI:0499	neutral component	MI:0497		EBI-10599672	false		Saccharomyces cerevisiae (Baker's yeast)	4932	552091	validated two hybrid	MI:1356	0.72	nucleotide sequence identification	MI:0078	25416956	physical association	MI:0915	TXNDC9 (physical association) EXOSC8	false	physical association	TXNDC9 (physical association) EXOSC8
unspecified role	MI:0499	neutral component	MI:0497			false		unspecified role	MI:0499	neutral component	MI:0497		EBI-10523422	false		Saccharomyces cerevisiae (Baker's yeast)	4932	504419	validated two hybrid	MI:1356	0.67	nucleotide sequence identification	MI:0078	25416956	physical association	MI:0915	TXNDC9 (physical association) MAGEA6	false	physical association	TXNDC9 (physical association) MAGEA6
unspecified role	MI:0499	neutral component	MI:0497			false		unspecified role	MI:0499	neutral component	MI:0497		EBI-10500692	false		Saccharomyces cerevisiae (Baker's yeast)	4932	491119	validated two hybrid	MI:1356	0.56	nucleotide sequence identification	MI:0078	25416956	physical association	MI:0915	TXNDC9 (physical association) C3orf62	false	physical association	TXNDC9 (physical association) C3orf62
unspecified role	MI:0499	neutral component	MI:0497			false		unspecified role	MI:0499	neutral component	MI:0497		EBI-10500680	false		Saccharomyces cerevisiae (Baker's yeast)	4932	491113	validated two hybrid	MI:1356	0.56	nucleotide sequence identification	MI:0078	25416956	physical association	MI:0915	TXNDC9 (physical association) C1orf94	false	physical association	TXNDC9 (physical association) C1orf94
unspecified role	MI:0499	neutral component	MI:0497			false		unspecified role	MI:0499	neutral component	MI:0497		EBI-10500648	false		Saccharomyces cerevisiae (Baker's yeast)	4932	491095	validated two hybrid	MI:1356	0.56	nucleotide sequence identification	MI:0078	25416956	physical association	MI:0915	TXNDC9 (physical association) CCDC172	false	physical association	TXNDC9 (physical association) CCDC172
unspecified role	MI:0499	bait	MI:0496			false		unspecified role	MI:0499	prey	MI:0498		EBI-10339111	false		Saccharomyces cerevisiae (Baker's yeast)	4932	364934	two hybrid array	MI:0397	0.72	nucleotide sequence identification	MI:0078	25416956	physical association	MI:0915	TXNDC9 (physical association) EXOSC8	false	physical association	TXNDC9 (physical association) EXOSC8
unspecified role	MI:0499	bait	MI:0496			false		unspecified role	MI:0499	prey	MI:0498		EBI-10339091	false		Saccharomyces cerevisiae (Baker's yeast)	4932	364896	two hybrid array	MI:0397	0.56	nucleotide sequence identification	MI:0078	25416956	physical association	MI:0915	TXNDC9 (physical association) CEP76	false	physical association	TXNDC9 (physical association) CEP76
unspecified role	MI:0499	bait	MI:0496			false		unspecified role	MI:0499	prey	MI:0498		EBI-10339079	false		Saccharomyces cerevisiae (Baker's yeast)	4932	364890	two hybrid array	MI:0397	0.56	nucleotide sequence identification	MI:0078	25416956	physical association	MI:0915	TXNDC9 (physical association) PNMA1	false	physical association	TXNDC9 (physical association) PNMA1
unspecified role	MI:0499	bait	MI:0496			false		unspecified role	MI:0499	prey	MI:0498		EBI-10339065	false		Saccharomyces cerevisiae (Baker's yeast)	4932	364884	two hybrid array	MI:0397	0.56	nucleotide sequence identification	MI:0078	25416956	physical association	MI:0915	TXNDC9 (physical association) C3orf62	false	physical association	TXNDC9 (physical association) C3orf62
unspecified role	MI:0499	bait	MI:0496			false		unspecified role	MI:0499	prey	MI:0498		EBI-10339051	false		Saccharomyces cerevisiae (Baker's yeast)	4932	364878	two hybrid array	MI:0397	0.56	nucleotide sequence identification	MI:0078	25416956	physical association	MI:0915	TXNDC9 (physical association) C1orf94	false	physical association	TXNDC9 (physical association) C1orf94
unspecified role	MI:0499	bait	MI:0496			false		unspecified role	MI:0499	prey	MI:0498		EBI-10339039	false		Saccharomyces cerevisiae (Baker's yeast)	4932	364872	two hybrid array	MI:0397	0.67	nucleotide sequence identification	MI:0078	25416956	physical association	MI:0915	TXNDC9 (physical association) MAGEA6	false	physical association	TXNDC9 (physical association) MAGEA6
unspecified role	MI:0499	bait	MI:0496			false		unspecified role	MI:0499	prey	MI:0498		EBI-10339027	false		Saccharomyces cerevisiae (Baker's yeast)	4932	364866	two hybrid array	MI:0397	0.67	nucleotide sequence identification	MI:0078	25416956	physical association	MI:0915	TXNDC9 (physical association) MYOG	false	physical association	TXNDC9 (physical association) MYOG
unspecified role	MI:0499	bait	MI:0496			false		unspecified role	MI:0499	prey	MI:0498		EBI-10339015	false		Saccharomyces cerevisiae (Baker's yeast)	4932	364860	two hybrid array	MI:0397	0.56	nucleotide sequence identification	MI:0078	25416956	physical association	MI:0915	TXNDC9 (physical association) TRIM27	false	physical association	TXNDC9 (physical association) TRIM27
unspecified role	MI:0499	bait	MI:0496			false		unspecified role	MI:0499	prey	MI:0498		EBI-10181047	false		Saccharomyces cerevisiae (Baker's yeast)	4932	150018	two hybrid prey pooling approach	MI:1112	0.56	nucleotide sequence identification	MI:0078	25416956	physical association	MI:0915	TXNDC9 (physical association) DYDC1	false	physical association	TXNDC9 (physical association) DYDC1
unspecified role	MI:0499	bait	MI:0496			false		unspecified role	MI:0499	prey	MI:0498		EBI-10181037	false		Saccharomyces cerevisiae (Baker's yeast)	4932	150012	two hybrid prey pooling approach	MI:1112	0.56	nucleotide sequence identification	MI:0078	25416956	physical association	MI:0915	TXNDC9 (physical association) CEP76	false	physical association	TXNDC9 (physical association) CEP76
unspecified role	MI:0499	bait	MI:0496			false		unspecified role	MI:0499	prey	MI:0498		EBI-10181025	false		Saccharomyces cerevisiae (Baker's yeast)	4932	150006	two hybrid prey pooling approach	MI:1112	0.56	nucleotide sequence identification	MI:0078	25416956	physical association	MI:0915	TXNDC9 (physical association) PNMA1	false	physical association	TXNDC9 (physical association) PNMA1
unspecified role	MI:0499	bait	MI:0496			false		unspecified role	MI:0499	prey	MI:0498		EBI-10181011	false		Saccharomyces cerevisiae (Baker's yeast)	4932	150000	two hybrid prey pooling approach	MI:1112	0.56	nucleotide sequence identification	MI:0078	25416956	physical association	MI:0915	TXNDC9 (physical association) C3orf62	false	physical association	TXNDC9 (physical association) C3orf62
unspecified role	MI:0499	bait	MI:0496			false		unspecified role	MI:0499	prey	MI:0498		EBI-10180997	false		Saccharomyces cerevisiae (Baker's yeast)	4932	149978	two hybrid prey pooling approach	MI:1112	0.56	nucleotide sequence identification	MI:0078	25416956	physical association	MI:0915	TXNDC9 (physical association) C1orf94	false	physical association	TXNDC9 (physical association) C1orf94
unspecified role	MI:0499	bait	MI:0496			false		unspecified role	MI:0499	prey	MI:0498		EBI-10180961	false		Saccharomyces cerevisiae (Baker's yeast)	4932	149931	two hybrid prey pooling approach	MI:1112	0.56	nucleotide sequence identification	MI:0078	25416956	physical association	MI:0915	TXNDC9 (physical association) TRIM27	false	physical association	TXNDC9 (physical association) TRIM27
unspecified role	MI:0499	bait	MI:0496			false		unspecified role	MI:0499	prey	MI:0498		EBI-10180973	false		Saccharomyces cerevisiae (Baker's yeast)	4932	149966	two hybrid prey pooling approach	MI:1112	0.67	nucleotide sequence identification	MI:0078	25416956	physical association	MI:0915	TXNDC9 (physical association) MYOG	false	physical association	TXNDC9 (physical association) MYOG
unspecified role	MI:0499	bait	MI:0496			false		unspecified role	MI:0499	prey	MI:0498		EBI-10180985	false		Saccharomyces cerevisiae (Baker's yeast)	4932	149972	two hybrid prey pooling approach	MI:1112	0.67	nucleotide sequence identification	MI:0078	25416956	physical association	MI:0915	TXNDC9 (physical association) MAGEA6	false	physical association	TXNDC9 (physical association) MAGEA6
				EBI-21558248	1	true	24430|10748							false							0.35						TXNDC9 (interact with) CCT3	false		TXNDC9 (interact with) CCT3
				EBI-21558248	1	true	24432|10746							false							0.35						TXNDC9 (interact with) GNB2	false		TXNDC9 (interact with) GNB2
				EBI-21558248	1	true	24434|10744							false							0.35						TXNDC9 (interact with) TUBA4A	false		TXNDC9 (interact with) TUBA4A
				EBI-21558248	1	true	24436|10742							false							0.35						TXNDC9 (interact with) CCT2	false		TXNDC9 (interact with) CCT2
				EBI-21558248	6	true	24438|24742|24744|24746|24748|24750|10428|10430|10432|10434|10436|10740					EBI-11897468|EBI-11897797|EBI-11897795|EBI-16799709|EBI-16799790|EBI-16799959|EBI-11897470		false							0.67						TXNDC9 (interact with) TUBA1A	false		TXNDC9 (interact with) TUBA1A
				EBI-21558248	1	true	24440|10738							false							0.35						TXNDC9 (interact with) CCT7	false		TXNDC9 (interact with) CCT7
				EBI-21558248	2	true	24442|24752|10426|10736					EBI-11139445		false							0.53						TXNDC9 (interact with) TUBA1C	false		TXNDC9 (interact with) TUBA1C
				EBI-21558248	1	true	24444|10734							false							0.35						TXNDC9 (interact with) SMYD2	false		TXNDC9 (interact with) SMYD2
					3	true	24450|24462|24478|10700|10716|10728							false							0.56						TXNDC9 (interact with) C3orf62	false		TXNDC9 (interact with) C3orf62
					3	true	24452|24464|24480|10698|10714|10726							false							0.56						TXNDC9 (interact with) C1orf94	false		TXNDC9 (interact with) C1orf94
					3	true	24454|24872|24874|10304|10306|10724							false							0.56						TXNDC9 (interact with) CCDC172	false		TXNDC9 (interact with) CCDC172
				EBI-8643713	4	true	24416|24448|24466|24486|10692|10712|10730|10762					EBI-8643710		false							0.67						TXNDC9 (interact with) MAGEA6	false		TXNDC9 (interact with) MAGEA6
					1	true	24420|10758					EBI-21688156		false							0.4						TXNDC9 (interact with) TMEM132E-DT	false		TXNDC9 (interact with) TMEM132E-DT
				EBI-21558248	1	true	24422|10756							false							0.35						TXNDC9 (interact with) TUBAL3	false		TXNDC9 (interact with) TUBAL3
				EBI-21558248	1	true	24424|10754							false							0.35						TXNDC9 (interact with) TCP1	false		TXNDC9 (interact with) TCP1
				EBI-21558248	1	true	24426|10752							false							0.35						TXNDC9 (interact with) CCT6A	false		TXNDC9 (interact with) CCT6A
				EBI-21558248	1	true	24428|10750							false							0.35						TXNDC9 (interact with) CCT5	false		TXNDC9 (interact with) CCT5
unspecified role	MI:0499	prey	MI:0498			false		unspecified role	MI:0499	bait	MI:0496		EBI-731191	false		Saccharomyces cerevisiae (Baker's yeast)	4932	10480439	two hybrid pooling approach	MI:0398	0.37	nucleotide sequence identification	MI:0078	16169070	physical association	MI:0915	GIT1 (physical association) TXNDC9	false	physical association	GIT1 (physical association) TXNDC9
					1	true	24522|10656							false							0.37						GIT1 (interact with) TXNDC9	false		GIT1 (interact with) TXNDC9
unspecified role	MI:0499	prey	MI:0498			false		unspecified role	MI:0499	bait	MI:0496		EBI-729504	false		Saccharomyces cerevisiae (Baker's yeast)	4932	10458848	two hybrid pooling approach	MI:0398	0.37	nucleotide sequence identification	MI:0078	16169070	physical association	MI:0915	PTN (physical association) TXNDC9	false	physical association	PTN (physical association) TXNDC9
					1	true	24526|10652							false							0.37						PTN (interact with) TXNDC9	false		PTN (interact with) TXNDC9
unspecified role	MI:0499	prey	MI:0498			false		unspecified role	MI:0499	bait	MI:0496		EBI-729501	false		Saccharomyces cerevisiae (Baker's yeast)	4932	10458794	two hybrid pooling approach	MI:0398	0.37	nucleotide sequence identification	MI:0078	16169070	physical association	MI:0915	IMMT (physical association) TXNDC9	false	physical association	IMMT (physical association) TXNDC9
					1	true	24530|10648							false							0.37						IMMT (interact with) TXNDC9	false		IMMT (interact with) TXNDC9
unspecified role	MI:0499	prey	MI:0498			false		unspecified role	MI:0499	bait	MI:0496		EBI-729498	false		Saccharomyces cerevisiae (Baker's yeast)	4932	10458765	two hybrid pooling approach	MI:0398	0.37	nucleotide sequence identification	MI:0078	16169070	physical association	MI:0915	ELP1 (physical association) TXNDC9	false	physical association	ELP1 (physical association) TXNDC9
					1	true	24534|10644							false							0.37						ELP1 (interact with) TXNDC9	false		ELP1 (interact with) TXNDC9
unspecified role	MI:0499	prey	MI:0498			false		unspecified role	MI:0499	bait	MI:0496		EBI-729495	false		Saccharomyces cerevisiae (Baker's yeast)	4932	10458736	two hybrid pooling approach	MI:0398	0.51	nucleotide sequence identification	MI:0078	16169070	physical association	MI:0915	FEZ1 (physical association) TXNDC9	false	physical association	FEZ1 (physical association) TXNDC9
				EBI-707552	2	true	24538|24418|10640|10760					EBI-707564		false							0.51						FEZ1 (interact with) TXNDC9	false		FEZ1 (interact with) TXNDC9
unspecified role	MI:0499	prey	MI:0498			false		unspecified role	MI:0499	bait	MI:0496		EBI-728702	false		Saccharomyces cerevisiae (Baker's yeast)	4932	10449768	two hybrid pooling approach	MI:0398	0.37	nucleotide sequence identification	MI:0078	16169070	physical association	MI:0915	SETDB1 (physical association) TXNDC9	false	physical association	SETDB1 (physical association) TXNDC9
					1	true	24542|10636							false							0.37						SETDB1 (interact with) TXNDC9	false		SETDB1 (interact with) TXNDC9
unspecified role	MI:0499	prey	MI:0498			false		unspecified role	MI:0499	bait	MI:0496		EBI-728699	false		Saccharomyces cerevisiae (Baker's yeast)	4932	10449725	two hybrid pooling approach	MI:0398	0.37	nucleotide sequence identification	MI:0078	16169070	physical association	MI:0915	CEP126 (physical association) TXNDC9	false	physical association	CEP126 (physical association) TXNDC9
					1	true	24546|10632							false							0.37						CEP126 (interact with) TXNDC9	false		CEP126 (interact with) TXNDC9
unspecified role	MI:0499	prey	MI:0498			false		unspecified role	MI:0499	bait	MI:0496		EBI-728696	false		Saccharomyces cerevisiae (Baker's yeast)	4932	10449703	two hybrid pooling approach	MI:0398	0.37	nucleotide sequence identification	MI:0078	16169070	physical association	MI:0915	CHD3 (physical association) TXNDC9	false	physical association	CHD3 (physical association) TXNDC9
					1	true	24550|10628							false							0.37						CHD3 (interact with) TXNDC9	false		CHD3 (interact with) TXNDC9
unspecified role	MI:0499	bait	MI:0496	EBI-27080309		false		unspecified role	MI:0499	prey	MI:0498		EBI-27079701	false	spoke expansion	human mkn28	9606	8506536	proximity-dependent biotin identification	MI:1314	0.27	sequence tag identification	MI:0102	25468996	proximity	MI:2364	CDH1 (proximity) TXNDC9	false	proximity	CDH1 (proximity) TXNDC9
				EBI-27080309	1	true	24554|10624							false							0.27						CDH1 (interact with) TXNDC9	false		CDH1 (interact with) TXNDC9
unspecified role	MI:0499	bait	MI:0496	EBI-25472536		false		unspecified role	MI:0499	prey	MI:0498		EBI-25472377	false	spoke expansion	Homo sapiens	9606	7345719	pull down	MI:0096	0.35	Identification by mass spectrometry	MI:0427	25281560	association	MI:0914	MED4 (association) TXNDC9	false	association	MED4 (association) TXNDC9
				EBI-25472536	1	true	24558|10620							false							0.35						MED4 (interact with) TXNDC9	false		MED4 (interact with) TXNDC9
unspecified role	MI:0499	neutral component	MI:0497			false		unspecified role	MI:0499	neutral component	MI:0497		EBI-25264892	false		Saccharomyces cerevisiae (Baker's yeast)	4932	7244786	validated two hybrid	MI:1356	0.56	nucleotide sequence identification	MI:0078	32296183	physical association	MI:0915	MED22 (physical association) TXNDC9	false	physical association	MED22 (physical association) TXNDC9
unspecified role	MI:0499	prey	MI:0498	EBI-23438615		false		unspecified role	MI:0499	bait	MI:0496	EBI-23438608	EBI-23438600	false		Saccharomyces cerevisiae (Baker's yeast)	4932	5607541	two hybrid array	MI:0397	0.56	nucleotide sequence identification	MI:0078	32296183	physical association	MI:0915	MED22 (physical association) TXNDC9	false	physical association	MED22 (physical association) TXNDC9
unspecified role	MI:0499	prey	MI:0498	EBI-23213670		false		unspecified role	MI:0499	bait	MI:0496	EBI-23213663	EBI-23213655	false		Saccharomyces cerevisiae (Baker's yeast)	4932	5500380	two hybrid prey pooling approach	MI:1112	0.56	nucleotide sequence identification	MI:0078	32296183	physical association	MI:0915	MED22 (physical association) TXNDC9	false	physical association	MED22 (physical association) TXNDC9
				EBI-23213670|EBI-23438615	3	true	24562|24564|24566|10612|10614|10616					EBI-23213663|EBI-23438608		false							0.56						MED22 (interact with) TXNDC9	false		MED22 (interact with) TXNDC9
unspecified role	MI:0499	neutral component	MI:0497			false		unspecified role	MI:0499	neutral component	MI:0497		EBI-25262634	false		Saccharomyces cerevisiae (Baker's yeast)	4932	7242245	validated two hybrid	MI:1356	0.56	nucleotide sequence identification	MI:0078	32296183	physical association	MI:0915	PICK1 (physical association) TXNDC9	false	physical association	PICK1 (physical association) TXNDC9
unspecified role	MI:0499	prey	MI:0498	EBI-24897675		false		unspecified role	MI:0499	bait	MI:0496	EBI-24897668	EBI-24897660	false		Saccharomyces cerevisiae (Baker's yeast)	4932	6890066	two hybrid prey pooling approach	MI:1112	0.56	nucleotide sequence identification	MI:0078	32296183	physical association	MI:0915	PICK1 (physical association) TXNDC9	false	physical association	PICK1 (physical association) TXNDC9
unspecified role	MI:0499	prey	MI:0498	EBI-23030327		false		unspecified role	MI:0499	bait	MI:0496	EBI-23030320	EBI-23030312	false		Saccharomyces cerevisiae (Baker's yeast)	4932	5302026	two hybrid array	MI:0397	0.56	nucleotide sequence identification	MI:0078	32296183	physical association	MI:0915	PICK1 (physical association) TXNDC9	false	physical association	PICK1 (physical association) TXNDC9
unspecified role	MI:0499	neutral component	MI:0497			false		unspecified role	MI:0499	neutral component	MI:0497		EBI-25256884	false		Saccharomyces cerevisiae (Baker's yeast)	4932	7238458	validated two hybrid	MI:1356	0.56	nucleotide sequence identification	MI:0078	32296183	physical association	MI:0915	PICK1 (physical association) GLYCTK	false	physical association	PICK1 (physical association) GLYCTK
unspecified role	MI:0499	prey	MI:0498	EBI-22936952		false		unspecified role	MI:0499	bait	MI:0496	EBI-22936945	EBI-22936937	false		Saccharomyces cerevisiae (Baker's yeast)	4932	5200410	two hybrid array	MI:0397	0.56	nucleotide sequence identification	MI:0078	32296183	physical association	MI:0915	PICK1 (physical association) GLYCTK	false	physical association	PICK1 (physical association) GLYCTK
unspecified role	MI:0499	prey	MI:0498	EBI-22480552		false		unspecified role	MI:0499	bait	MI:0496	EBI-22480545	EBI-22480537	false		Saccharomyces cerevisiae (Baker's yeast)	4932	4899178	two hybrid prey pooling approach	MI:1112	0.56	nucleotide sequence identification	MI:0078	32296183	physical association	MI:0915	PICK1 (physical association) GLYCTK	false	physical association	PICK1 (physical association) GLYCTK
unspecified role	MI:0499	prey	MI:0498	EBI-22854532		false		unspecified role	MI:0499	bait	MI:0496	EBI-22854525	EBI-22854517	false		Saccharomyces cerevisiae (Baker's yeast)	4932	5118264	two hybrid array	MI:0397	0.56	nucleotide sequence identification	MI:0078	32296183	physical association	MI:0915	PICK1 (physical association) TXNL4B	false	physical association	PICK1 (physical association) TXNL4B
unspecified role	MI:0499	prey	MI:0498	EBI-22396958		false		unspecified role	MI:0499	bait	MI:0496	EBI-22396951	EBI-22396943	false		Saccharomyces cerevisiae (Baker's yeast)	4932	4811974	two hybrid prey pooling approach	MI:1112	0.56	nucleotide sequence identification	MI:0078	32296183	physical association	MI:0915	PICK1 (physical association) TXNL4B	false	physical association	PICK1 (physical association) TXNL4B
				EBI-22936952|EBI-22480552	3	true	24576|24578|24580|10598|10600|10602					EBI-22936945|EBI-22480545		false							0.56						PICK1 (interact with) GLYCTK	false		PICK1 (interact with) GLYCTK
				EBI-24897675|EBI-23030327	3	true	24570|24572|24574|10604|10606|10608					EBI-23030320|EBI-24897668		false							0.56						PICK1 (interact with) TXNDC9	false		PICK1 (interact with) TXNDC9
unspecified role	MI:0499	prey	MI:0498	EBI-25136772		false		unspecified role	MI:0499	bait	MI:0496	EBI-25136765	EBI-25136757	false		Saccharomyces cerevisiae (Baker's yeast)	4932	7125376	two hybrid prey pooling approach	MI:1112	0.56	nucleotide sequence identification	MI:0078	32296183	physical association	MI:0915	TEX9 (physical association) TXNDC9	false	physical association	TEX9 (physical association) TXNDC9
unspecified role	MI:0499	neutral component	MI:0497			false		unspecified role	MI:0499	neutral component	MI:0497		EBI-24636798	false		Saccharomyces cerevisiae (Baker's yeast)	4932	6684662	validated two hybrid	MI:1356	0.56	nucleotide sequence identification	MI:0078	32296183	physical association	MI:0915	TEX9 (physical association) TXNDC9	false	physical association	TEX9 (physical association) TXNDC9
unspecified role	MI:0499	prey	MI:0498	EBI-23629981		false		unspecified role	MI:0499	bait	MI:0496	EBI-23629974	EBI-23629966	false		Saccharomyces cerevisiae (Baker's yeast)	4932	5820776	two hybrid array	MI:0397	0.56	nucleotide sequence identification	MI:0078	32296183	physical association	MI:0915	TEX9 (physical association) TXNDC9	false	physical association	TEX9 (physical association) TXNDC9
				EBI-25136772|EBI-23629981	3	true	24590|24592|24594|10584|10586|10588					EBI-23629974|EBI-25136765		false							0.56						TEX9 (interact with) TXNDC9	false		TEX9 (interact with) TXNDC9
unspecified role	MI:0499	prey	MI:0498	EBI-25131314|EBI-25131312		false		unspecified role	MI:0499	bait	MI:0496	EBI-25131305	EBI-25131297	false		Saccharomyces cerevisiae (Baker's yeast)	4932	7119588	two hybrid prey pooling approach	MI:1112	0.56	nucleotide sequence identification	MI:0078	32296183	physical association	MI:0915	COG4 (physical association) TXNDC9	false	physical association	COG4 (physical association) TXNDC9
unspecified role	MI:0499	neutral component	MI:0497	EBI-24633704		false		unspecified role	MI:0499	neutral component	MI:0497		EBI-24633694	false		Saccharomyces cerevisiae (Baker's yeast)	4932	6682543	validated two hybrid	MI:1356	0.56	nucleotide sequence identification	MI:0078	32296183	physical association	MI:0915	COG4 (physical association) TXNDC9	false	physical association	COG4 (physical association) TXNDC9
unspecified role	MI:0499	prey	MI:0498	EBI-23999763|EBI-23999761		false		unspecified role	MI:0499	bait	MI:0496	EBI-23999754	EBI-23999746	false		Saccharomyces cerevisiae (Baker's yeast)	4932	6138846	two hybrid array	MI:0397	0.56	nucleotide sequence identification	MI:0078	32296183	physical association	MI:0915	COG4 (physical association) TXNDC9	false	physical association	COG4 (physical association) TXNDC9
unspecified role	MI:0499	prey	MI:0498	EBI-23706861|EBI-23706859		false		unspecified role	MI:0499	bait	MI:0496	EBI-23706852	EBI-23706844	false		Saccharomyces cerevisiae (Baker's yeast)	4932	5874542	two hybrid prey pooling approach	MI:1112	0.56	nucleotide sequence identification	MI:0078	32296183	physical association	MI:0915	COG4 (physical association) TXNDC9	false	physical association	COG4 (physical association) TXNDC9
unspecified role	MI:0499	prey	MI:0498	EBI-23624521|EBI-23624519		false		unspecified role	MI:0499	bait	MI:0496	EBI-23624512	EBI-23624504	false		Saccharomyces cerevisiae (Baker's yeast)	4932	5814793	two hybrid array	MI:0397	0.56	nucleotide sequence identification	MI:0078	32296183	physical association	MI:0915	COG4 (physical association) TXNDC9	false	physical association	COG4 (physical association) TXNDC9
				EBI-23999761|EBI-23706859|EBI-23624519|EBI-25131312|EBI-25131314|EBI-24633704|EBI-23999763|EBI-23706861|EBI-23624521	5	true	24598|24600|24602|24604|24606|10572|10574|10576|10578|10580					EBI-23999754|EBI-25131305|EBI-23624512|EBI-23706852		false							0.56						COG4 (interact with) TXNDC9	false		COG4 (interact with) TXNDC9
unspecified role	MI:0499	prey	MI:0498	EBI-25124302		false		unspecified role	MI:0499	bait	MI:0496	EBI-25124295	EBI-25124287	false		Saccharomyces cerevisiae (Baker's yeast)	4932	7112178	two hybrid prey pooling approach	MI:1112	0.56	nucleotide sequence identification	MI:0078	32296183	physical association	MI:0915	PBX4 (physical association) TXNDC9	false	physical association	PBX4 (physical association) TXNDC9
unspecified role	MI:0499	neutral component	MI:0497			false		unspecified role	MI:0499	neutral component	MI:0497		EBI-24601656	false		Saccharomyces cerevisiae (Baker's yeast)	4932	6659428	validated two hybrid	MI:1356	0.56	nucleotide sequence identification	MI:0078	32296183	physical association	MI:0915	PBX4 (physical association) TXNDC9	false	physical association	PBX4 (physical association) TXNDC9
unspecified role	MI:0499	prey	MI:0498	EBI-24249493		false		unspecified role	MI:0499	bait	MI:0496	EBI-24249486	EBI-24249478	false		Saccharomyces cerevisiae (Baker's yeast)	4932	6415168	two hybrid array	MI:0397	0.56	nucleotide sequence identification	MI:0078	32296183	physical association	MI:0915	PBX4 (physical association) TXNDC9	false	physical association	PBX4 (physical association) TXNDC9
unspecified role	MI:0499	prey	MI:0498	EBI-23920348		false		unspecified role	MI:0499	bait	MI:0496	EBI-23920341	EBI-23920333	false		Saccharomyces cerevisiae (Baker's yeast)	4932	6061105	two hybrid prey pooling approach	MI:1112	0.56	nucleotide sequence identification	MI:0078	32296183	physical association	MI:0915	PBX4 (physical association) TXNDC9	false	physical association	PBX4 (physical association) TXNDC9
unspecified role	MI:0499	prey	MI:0498	EBI-23568524		false		unspecified role	MI:0499	bait	MI:0496	EBI-23568517	EBI-23568509	false		Saccharomyces cerevisiae (Baker's yeast)	4932	5757164	two hybrid array	MI:0397	0.56	nucleotide sequence identification	MI:0078	32296183	physical association	MI:0915	PBX4 (physical association) TXNDC9	false	physical association	PBX4 (physical association) TXNDC9
				EBI-24249493|EBI-23920348|EBI-25124302|EBI-23568524	5	true	24610|24612|24614|24616|24618|10560|10562|10564|10566|10568					EBI-25124295|EBI-24249486|EBI-23568517|EBI-23920341		false							0.56						PBX4 (interact with) TXNDC9	false		PBX4 (interact with) TXNDC9
unspecified role	MI:0499	prey	MI:0498	EBI-25005628		false		unspecified role	MI:0499	bait	MI:0496	EBI-25005621	EBI-25005613	false		Saccharomyces cerevisiae (Baker's yeast)	4932	6993413	two hybrid prey pooling approach	MI:1112	0.56	nucleotide sequence identification	MI:0078	32296183	physical association	MI:0915	ZNF655 (physical association) TXNDC9	false	physical association	ZNF655 (physical association) TXNDC9
unspecified role	MI:0499	neutral component	MI:0497			false		unspecified role	MI:0499	neutral component	MI:0497		EBI-24533774	false		Saccharomyces cerevisiae (Baker's yeast)	4932	6615830	validated two hybrid	MI:1356	0.56	nucleotide sequence identification	MI:0078	32296183	physical association	MI:0915	ZNF655 (physical association) TXNDC9	false	physical association	ZNF655 (physical association) TXNDC9
unspecified role	MI:0499	prey	MI:0498	EBI-23450264		false		unspecified role	MI:0499	bait	MI:0496	EBI-23450257	EBI-23450249	false		Saccharomyces cerevisiae (Baker's yeast)	4932	5621456	two hybrid array	MI:0397	0.56	nucleotide sequence identification	MI:0078	32296183	physical association	MI:0915	ZNF655 (physical association) TXNDC9	false	physical association	ZNF655 (physical association) TXNDC9
unspecified role	MI:0499	prey	MI:0498	EBI-25011173		false		unspecified role	MI:0499	bait	MI:0496	EBI-25011166	EBI-25011158	false		Saccharomyces cerevisiae (Baker's yeast)	4932	6998645	two hybrid prey pooling approach	MI:1112	0.56	nucleotide sequence identification	MI:0078	32296183	physical association	MI:0915	ZNF655 (physical association) FARS2	false	physical association	ZNF655 (physical association) FARS2
unspecified role	MI:0499	neutral component	MI:0497			false		unspecified role	MI:0499	neutral component	MI:0497		EBI-24537077	false		Saccharomyces cerevisiae (Baker's yeast)	4932	6617911	validated two hybrid	MI:1356	0.56	nucleotide sequence identification	MI:0078	32296183	physical association	MI:0915	ZNF655 (physical association) FARS2	false	physical association	ZNF655 (physical association) FARS2
unspecified role	MI:0499	prey	MI:0498	EBI-23455791		false		unspecified role	MI:0499	bait	MI:0496	EBI-23455784	EBI-23455776	false		Saccharomyces cerevisiae (Baker's yeast)	4932	5628251	two hybrid array	MI:0397	0.56	nucleotide sequence identification	MI:0078	32296183	physical association	MI:0915	ZNF655 (physical association) FARS2	false	physical association	ZNF655 (physical association) FARS2
				EBI-23455791|EBI-25011173	3	true	24628|24630|24632|10546|10548|10550					EBI-25011166|EBI-23455784		false							0.56						ZNF655 (interact with) FARS2	false		ZNF655 (interact with) FARS2
				EBI-25005628|EBI-23450264	3	true	24622|24624|24626|10552|10554|10556					EBI-23450257|EBI-25005621		false							0.56						ZNF655 (interact with) TXNDC9	false		ZNF655 (interact with) TXNDC9
unspecified role	MI:0499	prey	MI:0498	EBI-24886271		false		unspecified role	MI:0499	bait	MI:0496	EBI-24886264	EBI-24886256	false		Saccharomyces cerevisiae (Baker's yeast)	4932	6879154	two hybrid prey pooling approach	MI:1112	0.56	nucleotide sequence identification	MI:0078	32296183	physical association	MI:0915	LZTS1 (physical association) TXNDC9	false	physical association	LZTS1 (physical association) TXNDC9
unspecified role	MI:0499	neutral component	MI:0497			false		unspecified role	MI:0499	neutral component	MI:0497		EBI-24412297	false		Saccharomyces cerevisiae (Baker's yeast)	4932	6537659	validated two hybrid	MI:1356	0.56	nucleotide sequence identification	MI:0078	32296183	physical association	MI:0915	LZTS1 (physical association) TXNDC9	false	physical association	LZTS1 (physical association) TXNDC9
unspecified role	MI:0499	prey	MI:0498	EBI-23019095		false		unspecified role	MI:0499	bait	MI:0496	EBI-23019088	EBI-23019080	false		Saccharomyces cerevisiae (Baker's yeast)	4932	5290615	two hybrid array	MI:0397	0.56	nucleotide sequence identification	MI:0078	32296183	physical association	MI:0915	LZTS1 (physical association) TXNDC9	false	physical association	LZTS1 (physical association) TXNDC9
				EBI-24886271|EBI-23019095	3	true	24638|24640|24642|10536|10538|10540					EBI-24886264|EBI-23019088		false							0.56						LZTS1 (interact with) TXNDC9	false		LZTS1 (interact with) TXNDC9
unspecified role	MI:0499	neutral component	MI:0497			false		unspecified role	MI:0499	neutral component	MI:0497		EBI-24738417	false		Saccharomyces cerevisiae (Baker's yeast)	4932	6752417	validated two hybrid	MI:1356	0.56	nucleotide sequence identification	MI:0078	32296183	physical association	MI:0915	MRPL12 (physical association) TXNDC9	false	physical association	MRPL12 (physical association) TXNDC9
unspecified role	MI:0499	prey	MI:0498	EBI-24096775		false		unspecified role	MI:0499	bait	MI:0496	EBI-24096768	EBI-24096760	false		Saccharomyces cerevisiae (Baker's yeast)	4932	6234402	two hybrid array	MI:0397	0.56	nucleotide sequence identification	MI:0078	32296183	physical association	MI:0915	MRPL12 (physical association) TXNDC9	false	physical association	MRPL12 (physical association) TXNDC9
unspecified role	MI:0499	prey	MI:0498	EBI-23804753		false		unspecified role	MI:0499	bait	MI:0496	EBI-23804746	EBI-23804738	false		Saccharomyces cerevisiae (Baker's yeast)	4932	5974735	two hybrid prey pooling approach	MI:1112	0.56	nucleotide sequence identification	MI:0078	32296183	physical association	MI:0915	MRPL12 (physical association) TXNDC9	false	physical association	MRPL12 (physical association) TXNDC9
unspecified role	MI:0499	bait	MI:0496	EBI-21605805		false		unspecified role	MI:0499	prey	MI:0498		EBI-21605801	false	spoke expansion	Homo sapiens 293 cells transformed with SV40 large T antigen	9606	4203795	anti tag coimmunoprecipitation	MI:0007	0.35	sequence tag identification	MI:0102	28514442	association	MI:0914	MRPL12 (association) YARS2	false	association	MRPL12 (association) YARS2
				EBI-21605805	1	true	24652|10526							false							0.35						MRPL12 (interact with) YARS2	false		MRPL12 (interact with) YARS2
				EBI-23804753|EBI-24096775	3	true	24646|24648|24650|10528|10530|10532					EBI-23804746|EBI-24096768		false							0.56						MRPL12 (interact with) TXNDC9	false		MRPL12 (interact with) TXNDC9
unspecified role	MI:0499	neutral component	MI:0497			false		unspecified role	MI:0499	neutral component	MI:0497		EBI-24279954	false		Saccharomyces cerevisiae (Baker's yeast)	4932	6442348	validated two hybrid	MI:1356	0.72	nucleotide sequence identification	MI:0078	32296183	physical association	MI:0915	EXOSC8 (physical association) TXNDC9	false	physical association	EXOSC8 (physical association) TXNDC9
unspecified role	MI:0499	prey	MI:0498	EBI-22780002		false		unspecified role	MI:0499	bait	MI:0496	EBI-22779995	EBI-22779987	false		Saccharomyces cerevisiae (Baker's yeast)	4932	5046818	two hybrid array	MI:0397	0.72	nucleotide sequence identification	MI:0078	32296183	physical association	MI:0915	EXOSC8 (physical association) TXNDC9	false	physical association	EXOSC8 (physical association) TXNDC9
unspecified role	MI:0499	prey	MI:0498	EBI-22321530		false		unspecified role	MI:0499	bait	MI:0496	EBI-22321523	EBI-22321515	false		Saccharomyces cerevisiae (Baker's yeast)	4932	4728992	two hybrid prey pooling approach	MI:1112	0.72	nucleotide sequence identification	MI:0078	32296183	physical association	MI:0915	EXOSC8 (physical association) TXNDC9	false	physical association	EXOSC8 (physical association) TXNDC9
unspecified role	MI:0499	prey	MI:0498			false		unspecified role	MI:0499	bait	MI:0496		EBI-10181057	false		Saccharomyces cerevisiae (Baker's yeast)	4932	150045	two hybrid prey pooling approach	MI:1112	0.72	nucleotide sequence identification	MI:0078	25416956	physical association	MI:0915	EXOSC8 (physical association) TXNDC9	false	physical association	EXOSC8 (physical association) TXNDC9
unspecified role	MI:0499	prey	MI:0498	EBI-22871192		false		unspecified role	MI:0499	bait	MI:0496	EBI-22871185	EBI-22871177	false		Saccharomyces cerevisiae (Baker's yeast)	4932	5134311	two hybrid array	MI:0397	0.72	nucleotide sequence identification	MI:0078	32296183	physical association	MI:0915	EXOSC8 (physical association) TXNDC17	false	physical association	EXOSC8 (physical association) TXNDC17
unspecified role	MI:0499	prey	MI:0498	EBI-22413943		false		unspecified role	MI:0499	bait	MI:0496	EBI-22413936	EBI-22413928	false		Saccharomyces cerevisiae (Baker's yeast)	4932	4829808	two hybrid prey pooling approach	MI:1112	0.72	nucleotide sequence identification	MI:0078	32296183	physical association	MI:0915	EXOSC8 (physical association) TXNDC17	false	physical association	EXOSC8 (physical association) TXNDC17
unspecified role	MI:0499	prey	MI:0498			false		unspecified role	MI:0499	bait	MI:0496		EBI-10450194	false		Saccharomyces cerevisiae (Baker's yeast)	4932	455441	two hybrid array	MI:0397	0.72	nucleotide sequence identification	MI:0078	25416956	physical association	MI:0915	EXOSC8 (physical association) TXNDC17	false	physical association	EXOSC8 (physical association) TXNDC17
unspecified role	MI:0499	neutral component	MI:0497			false		unspecified role	MI:0499	neutral component	MI:0497		EBI-10599776	false		Saccharomyces cerevisiae (Baker's yeast)	4932	552165	validated two hybrid	MI:1356	0.72	nucleotide sequence identification	MI:0078	25416956	physical association	MI:0915	EXOSC8 (physical association) TXNDC17	false	physical association	EXOSC8 (physical association) TXNDC17
				EBI-22321530|EBI-22780002	6	true	24658|24660|24662|24446|24456|24664|10514|10516|10518|10520|10722|10732					EBI-22779995|EBI-22321523		false							0.72						EXOSC8 (interact with) TXNDC9	false		EXOSC8 (interact with) TXNDC9
unspecified role	MI:0499	bait	MI:0496			false		unspecified role	MI:0499	prey	MI:0498		EBI-22197897	false	spoke expansion	Human Umbilical Vein Endothelial Cells (HUVEC)	9606	4658916	anti bait coimmunoprecipitation	MI:0006	0.35	sequence tag identification	MI:0102	31540324	association	MI:0914	ENG (association) TXNDC9	false	association	ENG (association) TXNDC9
unspecified role	MI:0499	bait	MI:0496			false		unspecified role	MI:0499	prey	MI:0498		EBI-22197897	false	spoke expansion	Human Umbilical Vein Endothelial Cells (HUVEC)	9606	4658976	anti bait coimmunoprecipitation	MI:0006	0.35	sequence tag identification	MI:0102	31540324	association	MI:0914	ENG (association) L3HYPDH	false	association	ENG (association) L3HYPDH
unspecified role	MI:0499	bait	MI:0496			false		unspecified role	MI:0499	prey	MI:0498		EBI-22197897	false	spoke expansion	Human Umbilical Vein Endothelial Cells (HUVEC)	9606	4658856	anti bait coimmunoprecipitation	MI:0006	0.35	sequence tag identification	MI:0102	31540324	association	MI:0914	ENG (association) PGAM2	false	association	ENG (association) PGAM2
unspecified role	MI:0499	bait	MI:0496			false		unspecified role	MI:0499	prey	MI:0498		EBI-22197897	false	spoke expansion	Human Umbilical Vein Endothelial Cells (HUVEC)	9606	4658950	anti bait coimmunoprecipitation	MI:0006	0.35	sequence tag identification	MI:0102	31540324	association	MI:0914	ENG (association) PGP	false	association	ENG (association) PGP
					1	true	24678|10500							false							0.35						ENG (interact with) L3HYPDH	false		ENG (interact with) L3HYPDH
					1	true	24680|10498							false							0.35						ENG (interact with) PGAM2	false		ENG (interact with) PGAM2
					1	true	24682|10496							false							0.35						ENG (interact with) PGP	false		ENG (interact with) PGP
					1	true	24676|10502							false							0.35						ENG (interact with) TXNDC9	false		ENG (interact with) TXNDC9
unspecified role	MI:0499	unspecified role	MI:0499	EBI-22139411|EBI-22139408		false		unspecified role	MI:0499	unspecified role	MI:0499		EBI-22139403	true		Saccharomyces cerevisiae (Baker's yeast)	4932	4636180	two hybrid array	MI:0397	0.67	predetermined participant	MI:0396	31515488	physical association	MI:0915	MYOG (physical association) TXNDC9	false	physical association	MYOG (physical association) TXNDC9
unspecified role	MI:0499	neutral component	MI:0497			false		unspecified role	MI:0499	neutral component	MI:0497		EBI-10500670	false		Saccharomyces cerevisiae (Baker's yeast)	4932	491107	validated two hybrid	MI:1356	0.67	nucleotide sequence identification	MI:0078	25416956	physical association	MI:0915	MYOG (physical association) TXNDC9	false	physical association	MYOG (physical association) TXNDC9
				EBI-22139411|EBI-22139408	4	true	24692|24694|24468|24484|10484|10486|10694|10710							false							0.67						MYOG (interact with) TXNDC9	false		MYOG (interact with) TXNDC9
unspecified role	MI:0499	bait	MI:0496	EBI-21688659		false		unspecified role	MI:0499	prey	MI:0498		EBI-21688655	false	spoke expansion	Homo sapiens 293 cells transformed with SV40 large T antigen	9606	4280089	anti tag coimmunoprecipitation	MI:0007	0.35	sequence tag identification	MI:0102	28514442	association	MI:0914	TUBG2 (association) TXNDC9	false	association	TUBG2 (association) TXNDC9
				EBI-21688659	1	true	24698|10480							false							0.35						TUBG2 (interact with) TXNDC9	false		TUBG2 (interact with) TXNDC9
unspecified role	MI:0499	bait	MI:0496	EBI-21688604		false		unspecified role	MI:0499	prey	MI:0498		EBI-21688600	false	spoke expansion	Homo sapiens 293 cells transformed with SV40 large T antigen	9606	4279991	anti tag coimmunoprecipitation	MI:0007	0.35	sequence tag identification	MI:0102	28514442	association	MI:0914	PNPLA1 (association) TXNDC9	false	association	PNPLA1 (association) TXNDC9
				EBI-21688604	1	true	24702|10476							false							0.35						PNPLA1 (interact with) TXNDC9	false		PNPLA1 (interact with) TXNDC9
unspecified role	MI:0499	bait	MI:0496	EBI-21688514		false		unspecified role	MI:0499	prey	MI:0498		EBI-21688510	false	spoke expansion	Homo sapiens 293 cells transformed with SV40 large T antigen	9606	4279928	anti tag coimmunoprecipitation	MI:0007	0.35	sequence tag identification	MI:0102	28514442	association	MI:0914	WDR86 (association) TXNDC9	false	association	WDR86 (association) TXNDC9
				EBI-21688514	1	true	24706|10472							false							0.35						WDR86 (interact with) TXNDC9	false		WDR86 (interact with) TXNDC9
unspecified role	MI:0499	bait	MI:0496	EBI-21688460		false		unspecified role	MI:0499	prey	MI:0498		EBI-21688456	false	spoke expansion	Homo sapiens 293 cells transformed with SV40 large T antigen	9606	4279846	anti tag coimmunoprecipitation	MI:0007	0.35	sequence tag identification	MI:0102	28514442	association	MI:0914	tuba3c_tuba3d_human (association) TXNDC9	false	association	tuba3c_tuba3d_human (association) TXNDC9
				EBI-21688460	1	true	24710|10468							false							0.35						tuba3c_tuba3d_human (interact with) TXNDC9	false		tuba3c_tuba3d_human (interact with) TXNDC9
unspecified role	MI:0499	bait	MI:0496	EBI-21688375		false		unspecified role	MI:0499	prey	MI:0498		EBI-21688371	false	spoke expansion	Homo sapiens 293 cells transformed with SV40 large T antigen	9606	4279801	anti tag coimmunoprecipitation	MI:0007	0.35	sequence tag identification	MI:0102	28514442	association	MI:0914	TUBA1B (association) TXNDC9	false	association	TUBA1B (association) TXNDC9
				EBI-21688375	1	true	24714|10464							false							0.35						TUBA1B (interact with) TXNDC9	false		TUBA1B (interact with) TXNDC9
unspecified role	MI:0499	bait	MI:0496	EBI-21688284		false		unspecified role	MI:0499	prey	MI:0498		EBI-21688280	false	spoke expansion	Homo sapiens 293 cells transformed with SV40 large T antigen	9606	4279726	anti tag coimmunoprecipitation	MI:0007	0.35	sequence tag identification	MI:0102	28514442	association	MI:0914	FBXW4 (association) TXNDC9	false	association	FBXW4 (association) TXNDC9
				EBI-21688284	1	true	24718|10460							false							0.35						FBXW4 (interact with) TXNDC9	false		FBXW4 (interact with) TXNDC9
unspecified role	MI:0499	bait	MI:0496	EBI-21688175		false		unspecified role	MI:0499	prey	MI:0498		EBI-21688171	false	spoke expansion	Homo sapiens 293 cells transformed with SV40 large T antigen	9606	4279624	anti tag coimmunoprecipitation	MI:0007	0.35	sequence tag identification	MI:0102	28514442	association	MI:0914	MPPED1 (association) TXNDC9	false	association	MPPED1 (association) TXNDC9
				EBI-21688175	1	true	24722|10456							false							0.35						MPPED1 (interact with) TXNDC9	false		MPPED1 (interact with) TXNDC9
unspecified role	MI:0499	bait	MI:0496	EBI-21683534		false		unspecified role	MI:0499	prey	MI:0498		EBI-21683530	false	spoke expansion	Homo sapiens 293 cells transformed with SV40 large T antigen	9606	4275494	anti tag coimmunoprecipitation	MI:0007	0.35	sequence tag identification	MI:0102	28514442	association	MI:0914	KLHDC8A (association) TXNDC9	false	association	KLHDC8A (association) TXNDC9
				EBI-21683534	1	true	24726|10452							false							0.35						KLHDC8A (interact with) TXNDC9	false		KLHDC8A (interact with) TXNDC9
unspecified role	MI:0499	neutral component	MI:0497			false		unspecified role	MI:0499	neutral component	MI:0497		EBI-20906760	false		Human U2-OS osteosarcoma cell line	9606	3733470	cross-linking study	MI:0030	0.4	sequence tag identification	MI:0102	30021884	physical association	MI:0915	CCT6A (physical association) FARS2	false	physical association	CCT6A (physical association) FARS2
					1	true	24730|10448							false							0.4						CCT6A (interact with) FARS2	false		CCT6A (interact with) FARS2
unspecified role	MI:0499	neutral component	MI:0497			false		unspecified role	MI:0499	neutral component	MI:0497		EBI-26222918	false		Saccharomyces cerevisiae (Baker's yeast)	4932	7953168	validated two hybrid	MI:1356	0.56	predetermined participant	MI:0396	32814053	physical association	MI:0915	CCT5 (physical association) HK3	false	physical association	CCT5 (physical association) HK3
unspecified role	MI:0499	bait	MI:0496			false		unspecified role	MI:0499	prey	MI:0498		EBI-26068779	false		Saccharomyces cerevisiae (Baker's yeast)	4932	7780726	two hybrid pooling approach	MI:0398	0.56	predetermined participant	MI:0396	32814053	physical association	MI:0915	CCT5 (physical association) HK3	false	physical association	CCT5 (physical association) HK3
unspecified role	MI:0499	bait	MI:0496			false		unspecified role	MI:0499	prey	MI:0498		EBI-25913948	false		Saccharomyces cerevisiae (Baker's yeast)	4932	7620888	two hybrid array	MI:0397	0.56	predetermined participant	MI:0396	32814053	physical association	MI:0915	CCT5 (physical association) HK3	false	physical association	CCT5 (physical association) HK3
					3	true	24734|24736|24738|10440|10442|10444							false							0.56						CCT5 (interact with) HK3	false		CCT5 (interact with) HK3
unspecified role	MI:0499	bait	MI:0496	EBI-16799959		false		unspecified role	MI:0499	prey	MI:0498		EBI-16799955	false	spoke expansion	Homo sapiens DU-145 prostate cancer cell line	9606	3137934	proximity-dependent biotin identification	MI:1314	0.67	sequence tag identification	MI:0102	29568061	proximity	MI:2364	TUBA1A (proximity) TXNDC9	false	proximity	TUBA1A (proximity) TXNDC9
unspecified role	MI:0499	bait	MI:0496	EBI-16799790		false		unspecified role	MI:0499	prey	MI:0498		EBI-16799786	false	spoke expansion	Homo sapiens	9606	3137827	pull down	MI:0096	0.67	sequence tag identification	MI:0102	29568061	association	MI:0914	TUBA1A (association) TXNDC9	false	association	TUBA1A (association) TXNDC9
unspecified role	MI:0499	bait	MI:0496	EBI-16799709		false		unspecified role	MI:0499	prey	MI:0498		EBI-16799705	false	spoke expansion	Homo sapiens	9606	3137647	proximity-dependent biotin identification	MI:1314	0.67	sequence tag identification	MI:0102	29568061	proximity	MI:2364	TUBA1A (proximity) TXNDC9	false	proximity	TUBA1A (proximity) TXNDC9
unspecified role	MI:0499	bait	MI:0496	EBI-11897795|EBI-11897797		false		unspecified role	MI:0499	prey	MI:0498		EBI-11897791	true	spoke expansion	Homo sapiens 293 cells transformed with SV40 large T antigen	9606	1445666	pull down	MI:0096	0.67	sequence tag identification	MI:0102	27291054	association	MI:0914	TUBA1A (association) TXNDC9	false	association	TUBA1A (association) TXNDC9
unspecified role	MI:0499	bait	MI:0496	EBI-11897468|EBI-11897470		false		unspecified role	MI:0499	prey	MI:0498		EBI-11897464	true	spoke expansion	Homo sapiens 293 cells transformed with SV40 large T antigen	9606	1445346	pull down	MI:0096	0.67	sequence tag identification	MI:0102	27291054	association	MI:0914	TUBA1A (association) TXNDC9	false	association	TUBA1A (association) TXNDC9
unspecified role	MI:0499	bait	MI:0496	EBI-11139445		false		unspecified role	MI:0499	prey	MI:0498		EBI-11139064	false	spoke expansion	Homo sapiens epitheloid cervix carcinoma cells	9606	970701	anti tag coimmunoprecipitation	MI:0007	0.53	sequence tag identification	MI:0102	26496610	association	MI:0914	TUBA1C (association) TXNDC9	false	association	TUBA1C (association) TXNDC9
unspecified role	MI:0499	bait	MI:0496	EBI-16800203		false		unspecified role	MI:0499	prey	MI:0498		EBI-16800199	false	spoke expansion	Homo sapiens DU-145 prostate cancer cell line	9606	3138114	proximity-dependent biotin identification	MI:1314	0.27	sequence tag identification	MI:0102	29568061	proximity	MI:2364	TUBG1 (proximity) TXNDC9	false	proximity	TUBG1 (proximity) TXNDC9
				EBI-16800203	1	true	24754|10424							false							0.27						TUBG1 (interact with) TXNDC9	false		TUBG1 (interact with) TXNDC9
unspecified role	MI:0499	bait	MI:0496	EBI-16791254		false		unspecified role	MI:0499	prey	MI:0498		EBI-16791250	false	spoke expansion	Homo sapiens	9606	3127877	proximity-dependent biotin identification	MI:1314	0.27	sequence tag identification	MI:0102	29568061	proximity	MI:2364	COX14 (proximity) TXNDC9	false	proximity	COX14 (proximity) TXNDC9
				EBI-16791254	1	true	24758|10420							false							0.27						COX14 (interact with) TXNDC9	false		COX14 (interact with) TXNDC9
unspecified role	MI:0499	bait	MI:0496			false		unspecified role	MI:0499	prey	MI:0498		EBI-11521773	false		Saccharomyces cerevisiae (Baker's yeast)	4932	1235331	two hybrid array	MI:0397	0.37	predetermined participant	MI:0396	23853584	physical association	MI:0915	NS (physical association) TXNDC9	false	physical association	NS (physical association) TXNDC9
					1	true	24762|10416							false							0.37						NS (interact with) TXNDC9	false		NS (interact with) TXNDC9
unspecified role	MI:0499	bait	MI:0496			false		unspecified role	MI:0499	prey	MI:0498		EBI-11521579	false		Saccharomyces cerevisiae (Baker's yeast)	4932	1235072	two hybrid array	MI:0397	0.37	predetermined participant	MI:0396	23853584	physical association	MI:0915	NS2 (physical association) TXNDC9	false	physical association	NS2 (physical association) TXNDC9
					1	true	24766|10412							false							0.37						NS2 (interact with) TXNDC9	false		NS2 (interact with) TXNDC9
unspecified role	MI:0499	bait	MI:0496	EBI-11423812		false		unspecified role	MI:0499	prey	MI:0498		EBI-11423807	false		Saccharomyces cerevisiae (Baker's yeast)	4932	1154152	two hybrid array	MI:0397	0.37	predetermined participant	MI:0396	22014111	physical association	MI:0915	polg_alkv (physical association) TXNDC9	false	physical association	polg_alkv (physical association) TXNDC9
				EBI-11423812	1	true	24770|10408							false							0.37						polg_alkv (interact with) TXNDC9	false		polg_alkv (interact with) TXNDC9
unspecified role	MI:0499	bait	MI:0496	EBI-11423804		false		unspecified role	MI:0499	prey	MI:0498		EBI-11423799	false		Saccharomyces cerevisiae (Baker's yeast)	4932	1154140	two hybrid array	MI:0397	0.37	predetermined participant	MI:0396	22014111	physical association	MI:0915	q88489_9flav (physical association) TXNDC9	false	physical association	q88489_9flav (physical association) TXNDC9
				EBI-11423804	1	true	24774|10404							false							0.37						q88489_9flav (interact with) TXNDC9	false		q88489_9flav (interact with) TXNDC9
unspecified role	MI:0499	bait	MI:0496	EBI-11399199		false		unspecified role	MI:0499	prey	MI:0498		EBI-11399124	false	spoke expansion	Homo sapiens transformed primary embryonal kidney cells	9606	1132468	proximity-dependent biotin identification	MI:1314	0.27	sequence tag identification	MI:0102	26638075	proximity	MI:2364	B9D1 (proximity) TXNDC9	false	proximity	B9D1 (proximity) TXNDC9
unspecified role	MI:0499	bait	MI:0496	EBI-11379105		false		unspecified role	MI:0499	prey	MI:0498		EBI-11379035	false	spoke expansion	Homo sapiens transformed primary embryonal kidney cells	9606	1107032	proximity-dependent biotin identification	MI:1314	0.27	sequence tag identification	MI:0102	26638075	proximity	MI:2364	B9D1 (proximity) TXNDC9	false	proximity	B9D1 (proximity) TXNDC9
				EBI-11379105|EBI-11399199	2	true	24778|24780|10398|10400							false							0.27						B9D1 (interact with) TXNDC9	false		B9D1 (interact with) TXNDC9
unspecified role	MI:0499	bait	MI:0496	EBI-11394500		false		unspecified role	MI:0499	prey	MI:0498		EBI-11394140	false	spoke expansion	Homo sapiens transformed primary embryonal kidney cells	9606	1126548	proximity-dependent biotin identification	MI:1314	0.27	sequence tag identification	MI:0102	26638075	proximity	MI:2364	POC1A (proximity) TXNDC9	false	proximity	POC1A (proximity) TXNDC9
				EBI-11394500	1	true	24784|10394							false							0.27						POC1A (interact with) TXNDC9	false		POC1A (interact with) TXNDC9
unspecified role	MI:0499	bait	MI:0496	EBI-11385922		false		unspecified role	MI:0499	prey	MI:0498		EBI-11385552	false	spoke expansion	Homo sapiens transformed primary embryonal kidney cells	9606	1115761	proximity-dependent biotin identification	MI:1314	0.27	sequence tag identification	MI:0102	26638075	proximity	MI:2364	CEP170 (proximity) TXNDC9	false	proximity	CEP170 (proximity) TXNDC9
				EBI-11385922	1	true	24788|10390							false							0.27						CEP170 (interact with) TXNDC9	false		CEP170 (interact with) TXNDC9
unspecified role	MI:0499	bait	MI:0496	EBI-11383835		false		unspecified role	MI:0499	prey	MI:0498		EBI-11383475	false	spoke expansion	Homo sapiens transformed primary embryonal kidney cells	9606	1113004	proximity-dependent biotin identification	MI:1314	0.27	sequence tag identification	MI:0102	26638075	proximity	MI:2364	STIL (proximity) TXNDC9	false	proximity	STIL (proximity) TXNDC9
unspecified role	MI:0499	bait	MI:0496	EBI-11383835		false		unspecified role	MI:0499	prey	MI:0498		EBI-11383475	false	spoke expansion	Homo sapiens transformed primary embryonal kidney cells	9606	1113113	proximity-dependent biotin identification	MI:1314	0.27	sequence tag identification	MI:0102	26638075	proximity	MI:2364	STIL (proximity) AASDHPPT	false	proximity	STIL (proximity) AASDHPPT
				EBI-11383835	1	true	24792|10386							false							0.27						STIL (interact with) TXNDC9	false		STIL (interact with) TXNDC9
				EBI-11383835	1	true	24794|10384							false							0.27						STIL (interact with) AASDHPPT	false		STIL (interact with) AASDHPPT
unspecified role	MI:0499	bait	MI:0496	EBI-11079954		false		unspecified role	MI:0499	prey	MI:0498		EBI-11079890	false	spoke expansion	Homo sapiens epitheloid cervix carcinoma cells	9606	906542	anti tag coimmunoprecipitation	MI:0007	0.35	sequence tag identification	MI:0102	26496610	association	MI:0914	Csde1 (association) TXNDC9	false	association	Csde1 (association) TXNDC9
				EBI-11079954	1	true	24800|10378							false							0.35						Csde1 (interact with) TXNDC9	false		Csde1 (interact with) TXNDC9
unspecified role	MI:0499	bait	MI:0496	EBI-11029959		false		unspecified role	MI:0499	prey	MI:0498		EBI-11029792	false	spoke expansion	Homo sapiens epitheloid cervix carcinoma cells	9606	840996	anti tag coimmunoprecipitation	MI:0007	0.35	sequence tag identification	MI:0102	26496610	association	MI:0914	Cct8 (association) TXNDC9	false	association	Cct8 (association) TXNDC9
				EBI-11029959	1	true	24804|10374							false							0.35						Cct8 (interact with) TXNDC9	false		Cct8 (interact with) TXNDC9
unspecified role	MI:0499	bait	MI:0496	EBI-11029784		false		unspecified role	MI:0499	prey	MI:0498		EBI-11029579	false	spoke expansion	Homo sapiens epitheloid cervix carcinoma cells	9606	840841	anti tag coimmunoprecipitation	MI:0007	0.35	sequence tag identification	MI:0102	26496610	association	MI:0914	Cct3 (association) TXNDC9	false	association	Cct3 (association) TXNDC9
				EBI-11029784	1	true	24808|10370							false							0.35						Cct3 (interact with) TXNDC9	false		Cct3 (interact with) TXNDC9
unspecified role	MI:0499	bait	MI:0496	EBI-11028847		false		unspecified role	MI:0499	prey	MI:0498		EBI-11028702	false	spoke expansion	Homo sapiens epitheloid cervix carcinoma cells	9606	839789	anti tag coimmunoprecipitation	MI:0007	0.35	sequence tag identification	MI:0102	26496610	association	MI:0914	Cct4 (association) TXNDC9	false	association	Cct4 (association) TXNDC9
unspecified role	MI:0499	bait	MI:0496	EBI-11016722		false		unspecified role	MI:0499	prey	MI:0498		EBI-11016531	false	spoke expansion	Homo sapiens epitheloid cervix carcinoma cells	9606	819549	anti tag coimmunoprecipitation	MI:0007	0.35	sequence tag identification	MI:0102	26496610	association	MI:0914	Cct4 (association) TXNDC9	false	association	Cct4 (association) TXNDC9
unspecified role	MI:0499	bait	MI:0496	EBI-11028847		false		unspecified role	MI:0499	prey	MI:0498		EBI-11028702	false	spoke expansion	Homo sapiens epitheloid cervix carcinoma cells	9606	839728	anti tag coimmunoprecipitation	MI:0007	0.35	sequence tag identification	MI:0102	26496610	association	MI:0914	Cct4 (association) TXNDC17	false	association	Cct4 (association) TXNDC17
				EBI-11028847|EBI-11016722	2	true	24812|24814|10364|10366							false							0.35						Cct4 (interact with) TXNDC9	false		Cct4 (interact with) TXNDC9
				EBI-11028847	1	true	24816|10362							false							0.35						Cct4 (interact with) TXNDC17	false		Cct4 (interact with) TXNDC17
unspecified role	MI:0499	bait	MI:0496	EBI-11019625		false		unspecified role	MI:0499	prey	MI:0498		EBI-11019523	false	spoke expansion	Homo sapiens epitheloid cervix carcinoma cells	9606	824634	anti tag coimmunoprecipitation	MI:0007	0.35	sequence tag identification	MI:0102	26496610	association	MI:0914	Cct7 (association) TXNDC9	false	association	Cct7 (association) TXNDC9
				EBI-11019625	1	true	24822|10356							false							0.35						Cct7 (interact with) TXNDC9	false		Cct7 (interact with) TXNDC9
unspecified role	MI:0499	bait	MI:0496	EBI-11019515		false		unspecified role	MI:0499	prey	MI:0498		EBI-11019324	false	spoke expansion	Homo sapiens epitheloid cervix carcinoma cells	9606	824464	anti tag coimmunoprecipitation	MI:0007	0.35	sequence tag identification	MI:0102	26496610	association	MI:0914	Cct2 (association) TXNDC9	false	association	Cct2 (association) TXNDC9
				EBI-11019515	1	true	24826|10352							false							0.35						Cct2 (interact with) TXNDC9	false		Cct2 (interact with) TXNDC9
unspecified role	MI:0499	bait	MI:0496	EBI-11017417		false		unspecified role	MI:0499	prey	MI:0498		EBI-11017276	false	spoke expansion	Homo sapiens epitheloid cervix carcinoma cells	9606	820623	anti tag coimmunoprecipitation	MI:0007	0.35	sequence tag identification	MI:0102	26496610	association	MI:0914	Tuba3a (association) TXNDC9	false	association	Tuba3a (association) TXNDC9
unspecified role	MI:0499	bait	MI:0496	EBI-10993103		false		unspecified role	MI:0499	prey	MI:0498		EBI-10992821	false	spoke expansion	Homo sapiens epitheloid cervix carcinoma cells	9606	767566	anti tag coimmunoprecipitation	MI:0007	0.35	sequence tag identification	MI:0102	26496610	association	MI:0914	Tuba3a (association) TXNDC9	false	association	Tuba3a (association) TXNDC9
				EBI-11017417|EBI-10993103	2	true	24830|24832|10346|10348							false							0.35						Tuba3a (interact with) TXNDC9	false		Tuba3a (interact with) TXNDC9
unspecified role	MI:0499	neutral component	MI:0497			false		unspecified role	MI:0499	neutral component	MI:0497		EBI-10501298	false		Saccharomyces cerevisiae (Baker's yeast)	4932	491479	validated two hybrid	MI:1356	0.56	nucleotide sequence identification	MI:0078	25416956	physical association	MI:0915	KLF11 (physical association) TXNDC9	false	physical association	KLF11 (physical association) TXNDC9
unspecified role	MI:0499	prey	MI:0498			false		unspecified role	MI:0499	bait	MI:0496		EBI-10338993	false		Saccharomyces cerevisiae (Baker's yeast)	4932	364848	two hybrid array	MI:0397	0.56	nucleotide sequence identification	MI:0078	25416956	physical association	MI:0915	KLF11 (physical association) TXNDC9	false	physical association	KLF11 (physical association) TXNDC9
unspecified role	MI:0499	prey	MI:0498			false		unspecified role	MI:0499	bait	MI:0496		EBI-10180939	false		Saccharomyces cerevisiae (Baker's yeast)	4932	149918	two hybrid prey pooling approach	MI:1112	0.56	nucleotide sequence identification	MI:0078	25416956	physical association	MI:0915	KLF11 (physical association) TXNDC9	false	physical association	KLF11 (physical association) TXNDC9
					3	true	24836|24838|24840|10338|10340|10342							false							0.56						KLF11 (interact with) TXNDC9	false		KLF11 (interact with) TXNDC9
unspecified role	MI:0499	neutral component	MI:0497			false		unspecified role	MI:0499	neutral component	MI:0497		EBI-10500722	false		Saccharomyces cerevisiae (Baker's yeast)	4932	491137	validated two hybrid	MI:1356	0.56	nucleotide sequence identification	MI:0078	25416956	physical association	MI:0915	DYDC1 (physical association) TXNDC9	false	physical association	DYDC1 (physical association) TXNDC9
unspecified role	MI:0499	prey	MI:0498			false		unspecified role	MI:0499	bait	MI:0496		EBI-10339101	false		Saccharomyces cerevisiae (Baker's yeast)	4932	364902	two hybrid array	MI:0397	0.56	nucleotide sequence identification	MI:0078	25416956	physical association	MI:0915	DYDC1 (physical association) TXNDC9	false	physical association	DYDC1 (physical association) TXNDC9
					3	true	24844|24846|24472|10332|10334|10706							false							0.56						DYDC1 (interact with) TXNDC9	false		DYDC1 (interact with) TXNDC9
unspecified role	MI:0499	neutral component	MI:0497			false		unspecified role	MI:0499	neutral component	MI:0497		EBI-10500712	false		Saccharomyces cerevisiae (Baker's yeast)	4932	491131	validated two hybrid	MI:1356	0.56	nucleotide sequence identification	MI:0078	25416956	physical association	MI:0915	CEP76 (physical association) TXNDC9	false	physical association	CEP76 (physical association) TXNDC9
					3	true	24850|24458|24474|10328|10704|10720							false							0.56						CEP76 (interact with) TXNDC9	false		CEP76 (interact with) TXNDC9
unspecified role	MI:0499	neutral component	MI:0497			false		unspecified role	MI:0499	neutral component	MI:0497		EBI-10500702	false		Saccharomyces cerevisiae (Baker's yeast)	4932	491125	validated two hybrid	MI:1356	0.56	nucleotide sequence identification	MI:0078	25416956	physical association	MI:0915	PNMA1 (physical association) TXNDC9	false	physical association	PNMA1 (physical association) TXNDC9
					3	true	24854|24460|24476|10324|10702|10718							false							0.56						PNMA1 (interact with) TXNDC9	false		PNMA1 (interact with) TXNDC9
unspecified role	MI:0499	neutral component	MI:0497			false		unspecified role	MI:0499	neutral component	MI:0497		EBI-10500658	false		Saccharomyces cerevisiae (Baker's yeast)	4932	491101	validated two hybrid	MI:1356	0.56	nucleotide sequence identification	MI:0078	25416956	physical association	MI:0915	TRIM27 (physical association) TXNDC9	false	physical association	TRIM27 (physical association) TXNDC9
unspecified role	MI:0499	neutral component	MI:0497			false		unspecified role	MI:0499	neutral component	MI:0497		EBI-10509560	false		Saccharomyces cerevisiae (Baker's yeast)	4932	496351	validated two hybrid	MI:1356	0.56	nucleotide sequence identification	MI:0078	25416956	physical association	MI:0915	TRIM27 (physical association) FARS2	false	physical association	TRIM27 (physical association) FARS2
unspecified role	MI:0499	prey	MI:0498			false		unspecified role	MI:0499	bait	MI:0496		EBI-10349139	false		Saccharomyces cerevisiae (Baker's yeast)	4932	373538	two hybrid array	MI:0397	0.56	nucleotide sequence identification	MI:0078	25416956	physical association	MI:0915	TRIM27 (physical association) FARS2	false	physical association	TRIM27 (physical association) FARS2
unspecified role	MI:0499	prey	MI:0498			false		unspecified role	MI:0499	bait	MI:0496		EBI-10191502	false		Saccharomyces cerevisiae (Baker's yeast)	4932	167956	two hybrid prey pooling approach	MI:1112	0.56	nucleotide sequence identification	MI:0078	25416956	physical association	MI:0915	TRIM27 (physical association) FARS2	false	physical association	TRIM27 (physical association) FARS2
unspecified role	MI:0499	prey	MI:0498			false		unspecified role	MI:0499	bait	MI:0496		EBI-10261637	false		Saccharomyces cerevisiae (Baker's yeast)	4932	263246	two hybrid prey pooling approach	MI:1112	0.56	nucleotide sequence identification	MI:0078	25416956	physical association	MI:0915	TRIM27 (physical association) GLYCTK	false	physical association	TRIM27 (physical association) GLYCTK
					3	true	24858|24470|24482|10320|10696|10708							false							0.56						TRIM27 (interact with) TXNDC9	false		TRIM27 (interact with) TXNDC9
					3	true	24860|24862|24864|10314|10316|10318							false							0.56						TRIM27 (interact with) FARS2	false		TRIM27 (interact with) FARS2
unspecified role	MI:0499	prey	MI:0498			false		unspecified role	MI:0499	bait	MI:0496		EBI-10339003	false		Saccharomyces cerevisiae (Baker's yeast)	4932	364854	two hybrid array	MI:0397	0.56	nucleotide sequence identification	MI:0078	25416956	physical association	MI:0915	CCDC172 (physical association) TXNDC9	false	physical association	CCDC172 (physical association) TXNDC9
unspecified role	MI:0499	prey	MI:0498			false		unspecified role	MI:0499	bait	MI:0496		EBI-10180949	false		Saccharomyces cerevisiae (Baker's yeast)	4932	149925	two hybrid prey pooling approach	MI:1112	0.56	nucleotide sequence identification	MI:0078	25416956	physical association	MI:0915	CCDC172 (physical association) TXNDC9	false	physical association	CCDC172 (physical association) TXNDC9
unspecified role	MI:0499	prey	MI:0498	EBI-7395257		false		unspecified role	MI:0499	bait	MI:0496	EBI-7395254	EBI-7395240	false		Saccharomyces cerevisiae	559292	10583319	two hybrid	MI:0018	0.37	predetermined participant	MI:0396	21900206	physical association	MI:0915	ALAS1 (physical association) TK1	false	physical association	ALAS1 (physical association) TK1
unspecified role	MI:0499	prey	MI:0498	EBI-7393323		false		unspecified role	MI:0499	bait	MI:0496	EBI-7393326	EBI-7393309	false		Saccharomyces cerevisiae	559292	10581186	two hybrid	MI:0018	0.37	predetermined participant	MI:0396	21900206	physical association	MI:0915	ALAS1 (physical association) SUMO2	false	physical association	ALAS1 (physical association) SUMO2
unspecified role	MI:0499	prey	MI:0498	EBI-7290343		false		unspecified role	MI:0499	bait	MI:0496	EBI-7290340	EBI-7290326	false		Saccharomyces cerevisiae	559292	10453492	two hybrid	MI:0018	0.37	predetermined participant	MI:0396	21900206	physical association	MI:0915	ALAS1 (physical association) PIK3CB	false	physical association	ALAS1 (physical association) PIK3CB
unspecified role	MI:0499	prey	MI:0498	EBI-7271252		false		unspecified role	MI:0499	bait	MI:0496	EBI-7271255	EBI-7271238	false		Saccharomyces cerevisiae	559292	10433589	two hybrid	MI:0018	0.37	predetermined participant	MI:0396	21900206	physical association	MI:0915	ALAS1 (physical association) NUDT3	false	physical association	ALAS1 (physical association) NUDT3
unspecified role	MI:0499	prey	MI:0498	EBI-7119717		false		unspecified role	MI:0499	bait	MI:0496	EBI-7119714	EBI-7119700	false		Saccharomyces cerevisiae	559292	10290467	two hybrid	MI:0018	0.37	predetermined participant	MI:0396	21900206	physical association	MI:0915	ALAS1 (physical association) CDKN1A	false	physical association	ALAS1 (physical association) CDKN1A
unspecified role	MI:0499	prey	MI:0498	EBI-7119047		false		unspecified role	MI:0499	bait	MI:0496	EBI-7119044	EBI-7119030	false		Saccharomyces cerevisiae	559292	10289781	two hybrid	MI:0018	0.37	predetermined participant	MI:0396	21900206	physical association	MI:0915	ALAS1 (physical association) CDK5	false	physical association	ALAS1 (physical association) CDK5
unspecified role	MI:0499	unspecified role	MI:0499			false		unspecified role	MI:0499	unspecified role	MI:0499		EBI-3905052	false		Saccharomyces cerevisiae (Baker's yeast)	4932	9288337	two hybrid array	MI:0397	0.37	predetermined participant	MI:0396	21988832	physical association	MI:0915	ALAS1 (physical association) PLAU	false	physical association	ALAS1 (physical association) PLAU
unspecified role	MI:0499	neutral component	MI:0497			false		unspecified role	MI:0499	neutral component	MI:0497		EBI-26211923	false		Saccharomyces cerevisiae (Baker's yeast)	4932	7942624	validated two hybrid	MI:1356	0.56	predetermined participant	MI:0396	32814053	physical association	MI:0915	ALAS1 (physical association) DNALI1	false	physical association	ALAS1 (physical association) DNALI1
unspecified role	MI:0499	prey	MI:0498			false		unspecified role	MI:0499	bait	MI:0496		EBI-26057776	false		Saccharomyces cerevisiae (Baker's yeast)	4932	7770629	two hybrid pooling approach	MI:0398	0.56	predetermined participant	MI:0396	32814053	physical association	MI:0915	ALAS1 (physical association) DNALI1	false	physical association	ALAS1 (physical association) DNALI1
unspecified role	MI:0499	prey	MI:0498			false		unspecified role	MI:0499	bait	MI:0496		EBI-25902748	false		Saccharomyces cerevisiae (Baker's yeast)	4932	7611401	two hybrid array	MI:0397	0.56	predetermined participant	MI:0396	32814053	physical association	MI:0915	ALAS1 (physical association) DNALI1	false	physical association	ALAS1 (physical association) DNALI1
unspecified role	MI:0499	prey	MI:0498	EBI-25033300		false		unspecified role	MI:0499	bait	MI:0496	EBI-25033293	EBI-25033285	false		Saccharomyces cerevisiae (Baker's yeast)	4932	7019661	two hybrid prey pooling approach	MI:1112	0.72	nucleotide sequence identification	MI:0078	32296183	physical association	MI:0915	ALAS1 (physical association) TMSB10	false	physical association	ALAS1 (physical association) TMSB10
unspecified role	MI:0499	prey	MI:0498	EBI-24978188		false		unspecified role	MI:0499	bait	MI:0496	EBI-24978181	EBI-24978173	false		Saccharomyces cerevisiae (Baker's yeast)	4932	6967222	two hybrid prey pooling approach	MI:1112	0.56	nucleotide sequence identification	MI:0078	32296183	physical association	MI:0915	ALAS1 (physical association) UTP14C	false	physical association	ALAS1 (physical association) UTP14C
unspecified role	MI:0499	prey	MI:0498	EBI-24965908		false		unspecified role	MI:0499	bait	MI:0496	EBI-24965901	EBI-24965893	false		Saccharomyces cerevisiae (Baker's yeast)	4932	6955456	two hybrid prey pooling approach	MI:1112	0.72	nucleotide sequence identification	MI:0078	32296183	physical association	MI:0915	ALAS1 (physical association) TEKT4	false	physical association	ALAS1 (physical association) TEKT4
unspecified role	MI:0499	prey	MI:0498	EBI-24948288		false		unspecified role	MI:0499	bait	MI:0496	EBI-24948281	EBI-24948273	false		Saccharomyces cerevisiae (Baker's yeast)	4932	6938664	two hybrid prey pooling approach	MI:1112	0.56	nucleotide sequence identification	MI:0078	32296183	physical association	MI:0915	ALAS1 (physical association) MTSS2	false	physical association	ALAS1 (physical association) MTSS2
unspecified role	MI:0499	prey	MI:0498	EBI-24915590		false		unspecified role	MI:0499	bait	MI:0496	EBI-24915583	EBI-24915575	false		Saccharomyces cerevisiae (Baker's yeast)	4932	6907263	two hybrid prey pooling approach	MI:1112	0.56	nucleotide sequence identification	MI:0078	32296183	physical association	MI:0915	ALAS1 (physical association) RNF168	false	physical association	ALAS1 (physical association) RNF168
unspecified role	MI:0499	prey	MI:0498	EBI-24850283		false		unspecified role	MI:0499	bait	MI:0496	EBI-24850276	EBI-24850268	false		Saccharomyces cerevisiae (Baker's yeast)	4932	6844534	two hybrid prey pooling approach	MI:1112	0.56	nucleotide sequence identification	MI:0078	32296183	physical association	MI:0915	ALAS1 (physical association) PIBF1	false	physical association	ALAS1 (physical association) PIBF1
unspecified role	MI:0499	neutral component	MI:0497			false		unspecified role	MI:0499	neutral component	MI:0497		EBI-24502696	false		Saccharomyces cerevisiae (Baker's yeast)	4932	6596029	validated two hybrid	MI:1356	0.56	nucleotide sequence identification	MI:0078	32296183	physical association	MI:0915	ALAS1 (physical association) ccsb orf id: 10568	false	physical association	ALAS1 (physical association) ccsb orf id: 10568
unspecified role	MI:0499	neutral component	MI:0497			false		unspecified role	MI:0499	neutral component	MI:0497		EBI-24358188	false		Saccharomyces cerevisiae (Baker's yeast)	4932	6500267	validated two hybrid	MI:1356	0.72	nucleotide sequence identification	MI:0078	32296183	physical association	MI:0915	ALAS1 (physical association) PPL	false	physical association	ALAS1 (physical association) PPL
unspecified role	MI:0499	neutral component	MI:0497			false		unspecified role	MI:0499	neutral component	MI:0497		EBI-24350248	false		Saccharomyces cerevisiae (Baker's yeast)	4932	6494308	validated two hybrid	MI:1356	0.67	nucleotide sequence identification	MI:0078	32296183	physical association	MI:0915	ALAS1 (physical association) ALAS1	false	physical association	ALAS1 (physical association) ALAS1
unspecified role	MI:0499	neutral component	MI:0497			false		unspecified role	MI:0499	neutral component	MI:0497		EBI-24339355	false		Saccharomyces cerevisiae (Baker's yeast)	4932	6485946	validated two hybrid	MI:1356	0.56	nucleotide sequence identification	MI:0078	32296183	physical association	MI:0915	ALAS1 (physical association) EP400	false	physical association	ALAS1 (physical association) EP400
unspecified role	MI:0499	neutral component	MI:0497			false		unspecified role	MI:0499	neutral component	MI:0497		EBI-24337420	false		Saccharomyces cerevisiae (Baker's yeast)	4932	6484681	validated two hybrid	MI:1356	0.56	nucleotide sequence identification	MI:0078	32296183	physical association	MI:0915	ALAS1 (physical association) COBL	false	physical association	ALAS1 (physical association) COBL
unspecified role	MI:0499	neutral component	MI:0497			false		unspecified role	MI:0499	neutral component	MI:0497		EBI-24336012	false		Saccharomyces cerevisiae (Baker's yeast)	4932	6483755	validated two hybrid	MI:1356	0.56	nucleotide sequence identification	MI:0078	32296183	physical association	MI:0915	ALAS1 (physical association) JRK	false	physical association	ALAS1 (physical association) JRK
unspecified role	MI:0499	neutral component	MI:0497			false		unspecified role	MI:0499	neutral component	MI:0497		EBI-24331853	false		Saccharomyces cerevisiae (Baker's yeast)	4932	6481021	validated two hybrid	MI:1356	0.56	nucleotide sequence identification	MI:0078	32296183	physical association	MI:0915	ALAS1 (physical association) GRXCR1	false	physical association	ALAS1 (physical association) GRXCR1
unspecified role	MI:0499	neutral component	MI:0497			false		unspecified role	MI:0499	neutral component	MI:0497		EBI-24292732	false		Saccharomyces cerevisiae (Baker's yeast)	4932	6452308	validated two hybrid	MI:1356	0.56	nucleotide sequence identification	MI:0078	32296183	physical association	MI:0915	ALAS1 (physical association) SNRPB2	false	physical association	ALAS1 (physical association) SNRPB2
unspecified role	MI:0499	neutral component	MI:0497			false		unspecified role	MI:0499	neutral component	MI:0497		EBI-24290067	false		Saccharomyces cerevisiae (Baker's yeast)	4932	6450276	validated two hybrid	MI:1356	0.56	nucleotide sequence identification	MI:0078	32296183	physical association	MI:0915	ALAS1 (physical association) HSBP1L1	false	physical association	ALAS1 (physical association) HSBP1L1
unspecified role	MI:0499	prey	MI:0498	EBI-23596123		false		unspecified role	MI:0499	bait	MI:0496	EBI-23596116	EBI-23596108	false		Saccharomyces cerevisiae (Baker's yeast)	4932	5785054	two hybrid array	MI:0397	0.56	nucleotide sequence identification	MI:0078	32296183	physical association	MI:0915	ALAS1 (physical association) FBXL8	false	physical association	ALAS1 (physical association) FBXL8
unspecified role	MI:0499	prey	MI:0498	EBI-23477864		false		unspecified role	MI:0499	bait	MI:0496	EBI-23477857	EBI-23477849	false		Saccharomyces cerevisiae (Baker's yeast)	4932	5656050	two hybrid array	MI:0397	0.72	nucleotide sequence identification	MI:0078	32296183	physical association	MI:0915	ALAS1 (physical association) TMSB10	false	physical association	ALAS1 (physical association) TMSB10
unspecified role	MI:0499	prey	MI:0498	EBI-23371736		false		unspecified role	MI:0499	bait	MI:0496	EBI-23371729	EBI-23371721	false		Saccharomyces cerevisiae (Baker's yeast)	4932	5537690	two hybrid prey pooling approach	MI:1112	0.56	nucleotide sequence identification	MI:0078	32296183	physical association	MI:0915	ALAS1 (physical association) FBXL8	false	physical association	ALAS1 (physical association) FBXL8
unspecified role	MI:0499	prey	MI:0498	EBI-23168298		false		unspecified role	MI:0499	bait	MI:0496	EBI-23168291	EBI-23168283	false		Saccharomyces cerevisiae (Baker's yeast)	4932	5446924	two hybrid array	MI:0397	0.56	nucleotide sequence identification	MI:0078	32296183	physical association	MI:0915	ALAS1 (physical association) ccsb orf id: 10568	false	physical association	ALAS1 (physical association) ccsb orf id: 10568
unspecified role	MI:0499	prey	MI:0498	EBI-23150956		false		unspecified role	MI:0499	bait	MI:0496	EBI-23150949	EBI-23150941	false		Saccharomyces cerevisiae (Baker's yeast)	4932	5427629	two hybrid array	MI:0397	0.72	nucleotide sequence identification	MI:0078	32296183	physical association	MI:0915	ALAS1 (physical association) RTL8B	false	physical association	ALAS1 (physical association) RTL8B
unspecified role	MI:0499	prey	MI:0498	EBI-23109771		false		unspecified role	MI:0499	bait	MI:0496	EBI-23109764	EBI-23109756	false		Saccharomyces cerevisiae (Baker's yeast)	4932	5384616	two hybrid array	MI:0397	0.56	nucleotide sequence identification	MI:0078	32296183	physical association	MI:0915	ALAS1 (physical association) UTP14C	false	physical association	ALAS1 (physical association) UTP14C
unspecified role	MI:0499	prey	MI:0498	EBI-23097693		false		unspecified role	MI:0499	bait	MI:0496	EBI-23097686	EBI-23097678	false		Saccharomyces cerevisiae (Baker's yeast)	4932	5372013	two hybrid array	MI:0397	0.72	nucleotide sequence identification	MI:0078	32296183	physical association	MI:0915	ALAS1 (physical association) TEKT4	false	physical association	ALAS1 (physical association) TEKT4
unspecified role	MI:0499	prey	MI:0498	EBI-23080258		false		unspecified role	MI:0499	bait	MI:0496	EBI-23080251	EBI-23080243	false		Saccharomyces cerevisiae (Baker's yeast)	4932	5354028	two hybrid array	MI:0397	0.56	nucleotide sequence identification	MI:0078	32296183	physical association	MI:0915	ALAS1 (physical association) MTSS2	false	physical association	ALAS1 (physical association) MTSS2
unspecified role	MI:0499	prey	MI:0498	EBI-23047966		false		unspecified role	MI:0499	bait	MI:0496	EBI-23047959	EBI-23047951	false		Saccharomyces cerevisiae (Baker's yeast)	4932	5319783	two hybrid array	MI:0397	0.56	nucleotide sequence identification	MI:0078	32296183	physical association	MI:0915	ALAS1 (physical association) RNF168	false	physical association	ALAS1 (physical association) RNF168
unspecified role	MI:0499	prey	MI:0498	EBI-22983610		false		unspecified role	MI:0499	bait	MI:0496	EBI-22983603	EBI-22983595	false		Saccharomyces cerevisiae (Baker's yeast)	4932	5252634	two hybrid array	MI:0397	0.56	nucleotide sequence identification	MI:0078	32296183	physical association	MI:0915	ALAS1 (physical association) PIBF1	false	physical association	ALAS1 (physical association) PIBF1
unspecified role	MI:0499	prey	MI:0498	EBI-22906361		false		unspecified role	MI:0499	bait	MI:0496	EBI-22906354	EBI-22906346	false		Saccharomyces cerevisiae (Baker's yeast)	4932	5168017	two hybrid array	MI:0397	0.72	nucleotide sequence identification	MI:0078	32296183	physical association	MI:0915	ALAS1 (physical association) PPL	false	physical association	ALAS1 (physical association) PPL
unspecified role	MI:0499	prey	MI:0498	EBI-22893508		false		unspecified role	MI:0499	bait	MI:0496	EBI-22893501	EBI-22893493	false		Saccharomyces cerevisiae (Baker's yeast)	4932	5155805	two hybrid array	MI:0397	0.67	nucleotide sequence identification	MI:0078	32296183	physical association	MI:0915	ALAS1 (physical association) ALAS1	false	physical association	ALAS1 (physical association) ALAS1
unspecified role	MI:0499	prey	MI:0498	EBI-22875992		false		unspecified role	MI:0499	bait	MI:0496	EBI-22875985	EBI-22875977	false		Saccharomyces cerevisiae (Baker's yeast)	4932	5138910	two hybrid array	MI:0397	0.56	nucleotide sequence identification	MI:0078	32296183	physical association	MI:0915	ALAS1 (physical association) EP400	false	physical association	ALAS1 (physical association) EP400
unspecified role	MI:0499	prey	MI:0498	EBI-22872878		false		unspecified role	MI:0499	bait	MI:0496	EBI-22872871	EBI-22872863	false		Saccharomyces cerevisiae (Baker's yeast)	4932	5135921	two hybrid array	MI:0397	0.56	nucleotide sequence identification	MI:0078	32296183	physical association	MI:0915	ALAS1 (physical association) COBL	false	physical association	ALAS1 (physical association) COBL
unspecified role	MI:0499	prey	MI:0498	EBI-22870622		false		unspecified role	MI:0499	bait	MI:0496	EBI-22870615	EBI-22870607	false		Saccharomyces cerevisiae (Baker's yeast)	4932	5133754	two hybrid array	MI:0397	0.56	nucleotide sequence identification	MI:0078	32296183	physical association	MI:0915	ALAS1 (physical association) JRK	false	physical association	ALAS1 (physical association) JRK
unspecified role	MI:0499	prey	MI:0498	EBI-22863894		false		unspecified role	MI:0499	bait	MI:0496	EBI-22863887	EBI-22863879	false		Saccharomyces cerevisiae (Baker's yeast)	4932	5127271	two hybrid array	MI:0397	0.56	nucleotide sequence identification	MI:0078	32296183	physical association	MI:0915	ALAS1 (physical association) GRXCR1	false	physical association	ALAS1 (physical association) GRXCR1
unspecified role	MI:0499	prey	MI:0498	EBI-22854552		false		unspecified role	MI:0499	bait	MI:0496	EBI-22854545|EBI-22854543	EBI-22854535	false		Saccharomyces cerevisiae (Baker's yeast)	4932	5118286	two hybrid array	MI:0397	0.72	nucleotide sequence identification	MI:0078	32296183	physical association	MI:0915	ALAS1 (physical association) LONRF1	false	physical association	ALAS1 (physical association) LONRF1
unspecified role	MI:0499	prey	MI:0498	EBI-22849732		false		unspecified role	MI:0499	bait	MI:0496	EBI-22849725	EBI-22849717	false		Saccharomyces cerevisiae (Baker's yeast)	4932	5113639	two hybrid array	MI:0397	0.72	nucleotide sequence identification	MI:0078	32296183	physical association	MI:0915	ALAS1 (physical association) ZNF564	false	physical association	ALAS1 (physical association) ZNF564
unspecified role	MI:0499	prey	MI:0498	EBI-22839189		false		unspecified role	MI:0499	bait	MI:0496	EBI-22839182	EBI-22839174	false		Saccharomyces cerevisiae (Baker's yeast)	4932	5103529	two hybrid array	MI:0397	0.56	nucleotide sequence identification	MI:0078	32296183	physical association	MI:0915	ALAS1 (physical association) LRRC45	false	physical association	ALAS1 (physical association) LRRC45
unspecified role	MI:0499	prey	MI:0498	EBI-22824860		false		unspecified role	MI:0499	bait	MI:0496	EBI-22824853	EBI-22824845	false		Saccharomyces cerevisiae (Baker's yeast)	4932	5089762	two hybrid array	MI:0397	0.72	nucleotide sequence identification	MI:0078	32296183	physical association	MI:0915	ALAS1 (physical association) ZNF175	false	physical association	ALAS1 (physical association) ZNF175
unspecified role	MI:0499	prey	MI:0498	EBI-22804471		false		unspecified role	MI:0499	bait	MI:0496	EBI-22804464	EBI-22804456	false		Saccharomyces cerevisiae (Baker's yeast)	4932	5070364	two hybrid array	MI:0397	0.56	nucleotide sequence identification	MI:0078	32296183	physical association	MI:0915	ALAS1 (physical association) CAP2	false	physical association	ALAS1 (physical association) CAP2
unspecified role	MI:0499	prey	MI:0498	EBI-22800676		false		unspecified role	MI:0499	bait	MI:0496	EBI-22800669	EBI-22800661	false		Saccharomyces cerevisiae (Baker's yeast)	4932	5066724	two hybrid array	MI:0397	0.56	nucleotide sequence identification	MI:0078	32296183	physical association	MI:0915	ALAS1 (physical association) SNRPB2	false	physical association	ALAS1 (physical association) SNRPB2
unspecified role	MI:0499	prey	MI:0498	EBI-22796352		false		unspecified role	MI:0499	bait	MI:0496	EBI-22796345	EBI-22796337	false		Saccharomyces cerevisiae (Baker's yeast)	4932	5062581	two hybrid array	MI:0397	0.56	nucleotide sequence identification	MI:0078	32296183	physical association	MI:0915	ALAS1 (physical association) HSBP1L1	false	physical association	ALAS1 (physical association) HSBP1L1
unspecified role	MI:0499	prey	MI:0498	EBI-22718788		false		unspecified role	MI:0499	bait	MI:0496	EBI-22718781	EBI-22718773	false		Saccharomyces cerevisiae (Baker's yeast)	4932	4984417	two hybrid prey pooling approach	MI:1112	0.56	nucleotide sequence identification	MI:0078	32296183	physical association	MI:0915	ALAS1 (physical association) ccsb orf id: 10568	false	physical association	ALAS1 (physical association) ccsb orf id: 10568
unspecified role	MI:0499	prey	MI:0498	EBI-22701276		false		unspecified role	MI:0499	bait	MI:0496	EBI-22701269	EBI-22701261	false		Saccharomyces cerevisiae (Baker's yeast)	4932	4965227	two hybrid prey pooling approach	MI:1112	0.72	nucleotide sequence identification	MI:0078	32296183	physical association	MI:0915	ALAS1 (physical association) RTL8B	false	physical association	ALAS1 (physical association) RTL8B
unspecified role	MI:0499	prey	MI:0498	EBI-22449592		false		unspecified role	MI:0499	bait	MI:0496	EBI-22449585	EBI-22449577	false		Saccharomyces cerevisiae (Baker's yeast)	4932	4867074	two hybrid prey pooling approach	MI:1112	0.72	nucleotide sequence identification	MI:0078	32296183	physical association	MI:0915	ALAS1 (physical association) PPL	false	physical association	ALAS1 (physical association) PPL
unspecified role	MI:0499	prey	MI:0498	EBI-22436607		false		unspecified role	MI:0499	bait	MI:0496	EBI-22436600	EBI-22436592	false		Saccharomyces cerevisiae (Baker's yeast)	4932	4853491	two hybrid prey pooling approach	MI:1112	0.67	nucleotide sequence identification	MI:0078	32296183	physical association	MI:0915	ALAS1 (physical association) ALAS1	false	physical association	ALAS1 (physical association) ALAS1
unspecified role	MI:0499	prey	MI:0498	EBI-22418801		false		unspecified role	MI:0499	bait	MI:0496	EBI-22418794	EBI-22418786	false		Saccharomyces cerevisiae (Baker's yeast)	4932	4834852	two hybrid prey pooling approach	MI:1112	0.56	nucleotide sequence identification	MI:0078	32296183	physical association	MI:0915	ALAS1 (physical association) EP400	false	physical association	ALAS1 (physical association) EP400
unspecified role	MI:0499	prey	MI:0498	EBI-22415649		false		unspecified role	MI:0499	bait	MI:0496	EBI-22415642	EBI-22415634	false		Saccharomyces cerevisiae (Baker's yeast)	4932	4831601	two hybrid prey pooling approach	MI:1112	0.56	nucleotide sequence identification	MI:0078	32296183	physical association	MI:0915	ALAS1 (physical association) COBL	false	physical association	ALAS1 (physical association) COBL
unspecified role	MI:0499	prey	MI:0498	EBI-22413333		false		unspecified role	MI:0499	bait	MI:0496	EBI-22413326	EBI-22413318	false		Saccharomyces cerevisiae (Baker's yeast)	4932	4829143	two hybrid prey pooling approach	MI:1112	0.56	nucleotide sequence identification	MI:0078	32296183	physical association	MI:0915	ALAS1 (physical association) JRK	false	physical association	ALAS1 (physical association) JRK
unspecified role	MI:0499	prey	MI:0498	EBI-22406526		false		unspecified role	MI:0499	bait	MI:0496	EBI-22406519	EBI-22406511	false		Saccharomyces cerevisiae (Baker's yeast)	4932	4822017	two hybrid prey pooling approach	MI:1112	0.56	nucleotide sequence identification	MI:0078	32296183	physical association	MI:0915	ALAS1 (physical association) GRXCR1	false	physical association	ALAS1 (physical association) GRXCR1
unspecified role	MI:0499	prey	MI:0498	EBI-22396978		false		unspecified role	MI:0499	bait	MI:0496	EBI-22396971|EBI-22396969	EBI-22396961	false		Saccharomyces cerevisiae (Baker's yeast)	4932	4811997	two hybrid prey pooling approach	MI:1112	0.72	nucleotide sequence identification	MI:0078	32296183	physical association	MI:0915	ALAS1 (physical association) LONRF1	false	physical association	ALAS1 (physical association) LONRF1
unspecified role	MI:0499	prey	MI:0498	EBI-22392131		false		unspecified role	MI:0499	bait	MI:0496	EBI-22392124	EBI-22392116	false		Saccharomyces cerevisiae (Baker's yeast)	4932	4806821	two hybrid prey pooling approach	MI:1112	0.72	nucleotide sequence identification	MI:0078	32296183	physical association	MI:0915	ALAS1 (physical association) ZNF564	false	physical association	ALAS1 (physical association) ZNF564
unspecified role	MI:0499	prey	MI:0498	EBI-22381561		false		unspecified role	MI:0499	bait	MI:0496	EBI-22381554	EBI-22381546	false		Saccharomyces cerevisiae (Baker's yeast)	4932	4795585	two hybrid prey pooling approach	MI:1112	0.56	nucleotide sequence identification	MI:0078	32296183	physical association	MI:0915	ALAS1 (physical association) LRRC45	false	physical association	ALAS1 (physical association) LRRC45
unspecified role	MI:0499	prey	MI:0498	EBI-22367022		false		unspecified role	MI:0499	bait	MI:0496	EBI-22367015	EBI-22367007	false		Saccharomyces cerevisiae (Baker's yeast)	4932	4779799	two hybrid prey pooling approach	MI:1112	0.72	nucleotide sequence identification	MI:0078	32296183	physical association	MI:0915	ALAS1 (physical association) ZNF175	false	physical association	ALAS1 (physical association) ZNF175
unspecified role	MI:0499	prey	MI:0498	EBI-22346339		false		unspecified role	MI:0499	bait	MI:0496	EBI-22346332	EBI-22346324	false		Saccharomyces cerevisiae (Baker's yeast)	4932	4757208	two hybrid prey pooling approach	MI:1112	0.56	nucleotide sequence identification	MI:0078	32296183	physical association	MI:0915	ALAS1 (physical association) CAP2	false	physical association	ALAS1 (physical association) CAP2
unspecified role	MI:0499	prey	MI:0498	EBI-22342446		false		unspecified role	MI:0499	bait	MI:0496	EBI-22342439	EBI-22342431	false		Saccharomyces cerevisiae (Baker's yeast)	4932	4752925	two hybrid prey pooling approach	MI:1112	0.56	nucleotide sequence identification	MI:0078	32296183	physical association	MI:0915	ALAS1 (physical association) SNRPB2	false	physical association	ALAS1 (physical association) SNRPB2
unspecified role	MI:0499	prey	MI:0498	EBI-22338102		false		unspecified role	MI:0499	bait	MI:0496	EBI-22338095	EBI-22338087	false		Saccharomyces cerevisiae (Baker's yeast)	4932	4748272	two hybrid prey pooling approach	MI:1112	0.56	nucleotide sequence identification	MI:0078	32296183	physical association	MI:0915	ALAS1 (physical association) HSBP1L1	false	physical association	ALAS1 (physical association) HSBP1L1
unspecified role	MI:0499	neutral component	MI:0497			false		unspecified role	MI:0499	neutral component	MI:0497	EBI-12728543|EBI-12728539	EBI-12728534	true		Saccharomyces cerevisiae (Baker's yeast)	4932	1646380	validated two hybrid	MI:1356	0.78	predetermined participant	MI:0396	25910212	physical association	MI:0915	ALAS1 (physical association) CDC73	false	physical association	ALAS1 (physical association) CDC73
unspecified role	MI:0499	prey	MI:0498			false		unspecified role	MI:0499	bait	MI:0496	EBI-12714283|EBI-12714279	EBI-12714274	true		Saccharomyces cerevisiae (Baker's yeast)	4932	1632265	two hybrid array	MI:0397	0.78	predetermined participant	MI:0396	25910212	physical association	MI:0915	ALAS1 (physical association) CDC73	false	physical association	ALAS1 (physical association) CDC73
unspecified role	MI:0499	prey	MI:0498			false		unspecified role	MI:0499	bait	MI:0496		EBI-12701534	false		Saccharomyces cerevisiae (Baker's yeast)	4932	1620131	two hybrid bait and prey pooling approach	MI:1113	0.78	nucleotide sequence identification	MI:0078	25910212	physical association	MI:0915	ALAS1 (physical association) CDC73	false	physical association	ALAS1 (physical association) CDC73
unspecified role	MI:0499	neutral component	MI:0497			false		unspecified role	MI:0499	neutral component	MI:0497		EBI-11550720	false		Saccharomyces cerevisiae (Baker's yeast)	4932	1272650	validated two hybrid	MI:1356	0.56	predetermined participant	MI:0396	27107014	physical association	MI:0915	ALAS1 (physical association) SRP1	false	physical association	ALAS1 (physical association) SRP1
unspecified role	MI:0499	neutral component	MI:0497			false		unspecified role	MI:0499	neutral component	MI:0497		EBI-11549324	false		Saccharomyces cerevisiae (Baker's yeast)	4932	1270550	validated two hybrid	MI:1356	0.56	predetermined participant	MI:0396	27107014	physical association	MI:0915	ALAS1 (physical association) MRP4	false	physical association	ALAS1 (physical association) MRP4
unspecified role	MI:0499	prey	MI:0498			false		unspecified role	MI:0499	bait	MI:0496		EBI-11544086	false		Saccharomyces cerevisiae (Baker's yeast)	4932	1265429	two hybrid array	MI:0397	0.56	nucleotide sequence identification	MI:0078	27107014	physical association	MI:0915	ALAS1 (physical association) CAF40	false	physical association	ALAS1 (physical association) CAF40
unspecified role	MI:0499	prey	MI:0498			false		unspecified role	MI:0499	bait	MI:0496		EBI-11534417	false		Saccharomyces cerevisiae (Baker's yeast)	4932	1254078	two hybrid pooling approach	MI:0398	0.56	nucleotide sequence identification	MI:0078	27107014	physical association	MI:0915	ALAS1 (physical association) SRP1	false	physical association	ALAS1 (physical association) SRP1
unspecified role	MI:0499	prey	MI:0498			false		unspecified role	MI:0499	bait	MI:0496		EBI-11532730	false		Saccharomyces cerevisiae (Baker's yeast)	4932	1251236	two hybrid pooling approach	MI:0398	0.56	nucleotide sequence identification	MI:0078	27107014	physical association	MI:0915	ALAS1 (physical association) NUP57	false	physical association	ALAS1 (physical association) NUP57
unspecified role	MI:0499	prey	MI:0498			false		unspecified role	MI:0499	bait	MI:0496		EBI-11530431	false		Saccharomyces cerevisiae (Baker's yeast)	4932	1248096	two hybrid pooling approach	MI:0398	0.56	nucleotide sequence identification	MI:0078	27107014	physical association	MI:0915	ALAS1 (physical association) FAU1	false	physical association	ALAS1 (physical association) FAU1
unspecified role	MI:0499	neutral component	MI:0497			false		unspecified role	MI:0499	neutral component	MI:0497		EBI-10632298	false		Saccharomyces cerevisiae (Baker's yeast)	4932	583769	validated two hybrid	MI:1356	0.72	nucleotide sequence identification	MI:0078	25416956	physical association	MI:0915	ALAS1 (physical association) ZNF175	false	physical association	ALAS1 (physical association) ZNF175
unspecified role	MI:0499	neutral component	MI:0497			false		unspecified role	MI:0499	neutral component	MI:0497		EBI-10604932	false		Saccharomyces cerevisiae (Baker's yeast)	4932	557407	validated two hybrid	MI:1356	0.67	nucleotide sequence identification	MI:0078	25416956	physical association	MI:0915	ALAS1 (physical association) EP400	false	physical association	ALAS1 (physical association) EP400
unspecified role	MI:0499	neutral component	MI:0497			false		unspecified role	MI:0499	neutral component	MI:0497		EBI-10578454	false		Saccharomyces cerevisiae (Baker's yeast)	4932	536843	validated two hybrid	MI:1356	0.56	nucleotide sequence identification	MI:0078	25416956	physical association	MI:0915	ALAS1 (physical association) SNX20	false	physical association	ALAS1 (physical association) SNX20
unspecified role	MI:0499	neutral component	MI:0497			false		unspecified role	MI:0499	neutral component	MI:0497		EBI-10572454	false		Saccharomyces cerevisiae (Baker's yeast)	4932	533255	validated two hybrid	MI:1356	0.68	nucleotide sequence identification	MI:0078	25416956	physical association	MI:0915	ALAS1 (physical association) KLHL35	false	physical association	ALAS1 (physical association) KLHL35
unspecified role	MI:0499	neutral component	MI:0497			false		unspecified role	MI:0499	neutral component	MI:0497		EBI-10571710	false		Saccharomyces cerevisiae (Baker's yeast)	4932	532823	validated two hybrid	MI:1356	0.56	nucleotide sequence identification	MI:0078	25416956	physical association	MI:0915	ALAS1 (physical association) MTFR2	false	physical association	ALAS1 (physical association) MTFR2
unspecified role	MI:0499	neutral component	MI:0497			false		unspecified role	MI:0499	neutral component	MI:0497		EBI-10559528	false		Saccharomyces cerevisiae (Baker's yeast)	4932	525611	validated two hybrid	MI:1356	0.56	nucleotide sequence identification	MI:0078	25416956	physical association	MI:0915	ALAS1 (physical association) BCL7A	false	physical association	ALAS1 (physical association) BCL7A
unspecified role	MI:0499	neutral component	MI:0497			false		unspecified role	MI:0499	neutral component	MI:0497		EBI-10544486	false		Saccharomyces cerevisiae (Baker's yeast)	4932	516773	validated two hybrid	MI:1356	0.56	nucleotide sequence identification	MI:0078	25416956	physical association	MI:0915	ALAS1 (physical association) TMSB4X	false	physical association	ALAS1 (physical association) TMSB4X
unspecified role	MI:0499	neutral component	MI:0497			false		unspecified role	MI:0499	neutral component	MI:0497		EBI-10513726	false		Saccharomyces cerevisiae (Baker's yeast)	4932	498767	validated two hybrid	MI:1356	0.56	nucleotide sequence identification	MI:0078	25416956	physical association	MI:0915	ALAS1 (physical association) 84460	false	physical association	ALAS1 (physical association) 84460
unspecified role	MI:0499	neutral component	MI:0497			false		unspecified role	MI:0499	neutral component	MI:0497		EBI-10513716	false		Saccharomyces cerevisiae (Baker's yeast)	4932	498761	validated two hybrid	MI:1356	0.56	nucleotide sequence identification	MI:0078	25416956	physical association	MI:0915	ALAS1 (physical association) 7120	false	physical association	ALAS1 (physical association) 7120
unspecified role	MI:0499	neutral component	MI:0497			false		unspecified role	MI:0499	neutral component	MI:0497		EBI-10513706	false		Saccharomyces cerevisiae (Baker's yeast)	4932	498755	validated two hybrid	MI:1356	0.56	nucleotide sequence identification	MI:0078	25416956	physical association	MI:0915	ALAS1 (physical association) 7116	false	physical association	ALAS1 (physical association) 7116
unspecified role	MI:0499	neutral component	MI:0497			false		unspecified role	MI:0499	neutral component	MI:0497		EBI-10513696	false		Saccharomyces cerevisiae (Baker's yeast)	4932	498749	validated two hybrid	MI:1356	0.56	nucleotide sequence identification	MI:0078	25416956	physical association	MI:0915	ALAS1 (physical association) 7115	false	physical association	ALAS1 (physical association) 7115
unspecified role	MI:0499	neutral component	MI:0497			false		unspecified role	MI:0499	neutral component	MI:0497		EBI-10513686	false		Saccharomyces cerevisiae (Baker's yeast)	4932	498743	validated two hybrid	MI:1356	0.67	nucleotide sequence identification	MI:0078	25416956	physical association	MI:0915	ALAS1 (physical association) POLDIP2	false	physical association	ALAS1 (physical association) POLDIP2
unspecified role	MI:0499	neutral component	MI:0497			false		unspecified role	MI:0499	neutral component	MI:0497		EBI-10513666	false		Saccharomyces cerevisiae (Baker's yeast)	4932	498731	validated two hybrid	MI:1356	0.72	nucleotide sequence identification	MI:0078	25416956	physical association	MI:0915	ALAS1 (physical association) TEKT4	false	physical association	ALAS1 (physical association) TEKT4
unspecified role	MI:0499	neutral component	MI:0497			false		unspecified role	MI:0499	neutral component	MI:0497		EBI-10513646	false		Saccharomyces cerevisiae (Baker's yeast)	4932	498719	validated two hybrid	MI:1356	0.72	nucleotide sequence identification	MI:0078	25416956	physical association	MI:0915	ALAS1 (physical association) ZNF564	false	physical association	ALAS1 (physical association) ZNF564
unspecified role	MI:0499	neutral component	MI:0497			false		unspecified role	MI:0499	neutral component	MI:0497		EBI-10513636	false		Saccharomyces cerevisiae (Baker's yeast)	4932	498713	validated two hybrid	MI:1356	0.56	nucleotide sequence identification	MI:0078	25416956	physical association	MI:0915	ALAS1 (physical association) TCEA2	false	physical association	ALAS1 (physical association) TCEA2
unspecified role	MI:0499	neutral component	MI:0497			false		unspecified role	MI:0499	neutral component	MI:0497		EBI-10505402	false		Saccharomyces cerevisiae (Baker's yeast)	4932	493903	validated two hybrid	MI:1356	0.72	nucleotide sequence identification	MI:0078	25416956	physical association	MI:0915	ALAS1 (physical association) PPL	false	physical association	ALAS1 (physical association) PPL
unspecified role	MI:0499	bait	MI:0496			false		unspecified role	MI:0499	prey	MI:0498		EBI-10484156	false		Saccharomyces cerevisiae (Baker's yeast)	4932	477600	two hybrid array	MI:0397	0.67	nucleotide sequence identification	MI:0078	25416956	physical association	MI:0915	ALAS1 (physical association) ALAS1	false	physical association	ALAS1 (physical association) ALAS1
unspecified role	MI:0499	prey	MI:0498			false		unspecified role	MI:0499	bait	MI:0496		EBI-10480677	false		Saccharomyces cerevisiae (Baker's yeast)	4932	475084	two hybrid array	MI:0397	0.72	nucleotide sequence identification	MI:0078	25416956	physical association	MI:0915	ALAS1 (physical association) ZNF175	false	physical association	ALAS1 (physical association) ZNF175
unspecified role	MI:0499	prey	MI:0498			false		unspecified role	MI:0499	bait	MI:0496		EBI-10479195	false		Saccharomyces cerevisiae (Baker's yeast)	4932	474160	two hybrid array	MI:0397	0.56	nucleotide sequence identification	MI:0078	25416956	physical association	MI:0915	ALAS1 (physical association) USP20	false	physical association	ALAS1 (physical association) USP20
unspecified role	MI:0499	prey	MI:0498			false		unspecified role	MI:0499	bait	MI:0496		EBI-10461577	false		Saccharomyces cerevisiae (Baker's yeast)	4932	462778	two hybrid array	MI:0397	0.56	nucleotide sequence identification	MI:0078	25416956	physical association	MI:0915	ALAS1 (physical association) SH2D4A	false	physical association	ALAS1 (physical association) SH2D4A
unspecified role	MI:0499	prey	MI:0498			false		unspecified role	MI:0499	bait	MI:0496		EBI-10444086	false		Saccharomyces cerevisiae (Baker's yeast)	4932	451481	two hybrid array	MI:0397	0.67	nucleotide sequence identification	MI:0078	25416956	physical association	MI:0915	ALAS1 (physical association) EP400	false	physical association	ALAS1 (physical association) EP400
unspecified role	MI:0499	prey	MI:0498			false		unspecified role	MI:0499	bait	MI:0496	EBI-10428631	EBI-10428621	false		Saccharomyces cerevisiae (Baker's yeast)	4932	440973	two hybrid array	MI:0397	0.56	nucleotide sequence identification	MI:0078	25416956	physical association	MI:0915	ALAS1 (physical association) CCHCR1	false	physical association	ALAS1 (physical association) CCHCR1
unspecified role	MI:0499	prey	MI:0498			false		unspecified role	MI:0499	bait	MI:0496	EBI-10407832	EBI-10407822	false		Saccharomyces cerevisiae (Baker's yeast)	4932	423965	two hybrid array	MI:0397	0.56	nucleotide sequence identification	MI:0078	25416956	physical association	MI:0915	ALAS1 (physical association) MTFR2	false	physical association	ALAS1 (physical association) MTFR2
unspecified role	MI:0499	prey	MI:0498			false		unspecified role	MI:0499	bait	MI:0496		EBI-10397509	false		Saccharomyces cerevisiae (Baker's yeast)	4932	414785	two hybrid array	MI:0397	0.56	nucleotide sequence identification	MI:0078	25416956	physical association	MI:0915	ALAS1 (physical association) BCL7A	false	physical association	ALAS1 (physical association) BCL7A
unspecified role	MI:0499	prey	MI:0498			false		unspecified role	MI:0499	bait	MI:0496		EBI-10394479	false		Saccharomyces cerevisiae (Baker's yeast)	4932	412063	two hybrid array	MI:0397	0.72	nucleotide sequence identification	MI:0078	25416956	physical association	MI:0915	ALAS1 (physical association) RTL8B	false	physical association	ALAS1 (physical association) RTL8B
unspecified role	MI:0499	prey	MI:0498			false		unspecified role	MI:0499	bait	MI:0496		EBI-10377448	false		Saccharomyces cerevisiae (Baker's yeast)	4932	397197	two hybrid array	MI:0397	0.72	nucleotide sequence identification	MI:0078	25416956	physical association	MI:0915	ALAS1 (physical association) TMSB10	false	physical association	ALAS1 (physical association) TMSB10
unspecified role	MI:0499	prey	MI:0498			false		unspecified role	MI:0499	bait	MI:0496		EBI-10355399	false		Saccharomyces cerevisiae (Baker's yeast)	4932	378992	two hybrid array	MI:0397	0.56	nucleotide sequence identification	MI:0078	25416956	physical association	MI:0915	ALAS1 (physical association) 84460	false	physical association	ALAS1 (physical association) 84460
unspecified role	MI:0499	prey	MI:0498			false		unspecified role	MI:0499	bait	MI:0496		EBI-10355389	false		Saccharomyces cerevisiae (Baker's yeast)	4932	378986	two hybrid array	MI:0397	0.56	nucleotide sequence identification	MI:0078	25416956	physical association	MI:0915	ALAS1 (physical association) 7120	false	physical association	ALAS1 (physical association) 7120
unspecified role	MI:0499	prey	MI:0498			false		unspecified role	MI:0499	bait	MI:0496		EBI-10355379	false		Saccharomyces cerevisiae (Baker's yeast)	4932	378980	two hybrid array	MI:0397	0.56	nucleotide sequence identification	MI:0078	25416956	physical association	MI:0915	ALAS1 (physical association) 7116	false	physical association	ALAS1 (physical association) 7116
unspecified role	MI:0499	prey	MI:0498			false		unspecified role	MI:0499	bait	MI:0496		EBI-10355369	false		Saccharomyces cerevisiae (Baker's yeast)	4932	378974	two hybrid array	MI:0397	0.56	nucleotide sequence identification	MI:0078	25416956	physical association	MI:0915	ALAS1 (physical association) 7115	false	physical association	ALAS1 (physical association) 7115
unspecified role	MI:0499	prey	MI:0498			false		unspecified role	MI:0499	bait	MI:0496		EBI-10344458	false		Saccharomyces cerevisiae (Baker's yeast)	4932	369455	two hybrid array	MI:0397	0.72	nucleotide sequence identification	MI:0078	25416956	physical association	MI:0915	ALAS1 (physical association) PPL	false	physical association	ALAS1 (physical association) PPL
unspecified role	MI:0499	prey	MI:0498			false		unspecified role	MI:0499	bait	MI:0496		EBI-10342024	false		Saccharomyces cerevisiae (Baker's yeast)	4932	367497	two hybrid array	MI:0397	0.56	nucleotide sequence identification	MI:0078	25416956	physical association	MI:0915	ALAS1 (physical association) WIPF1	false	physical association	ALAS1 (physical association) WIPF1
unspecified role	MI:0499	prey	MI:0498			false		unspecified role	MI:0499	bait	MI:0496		EBI-10326691	false		Saccharomyces cerevisiae (Baker's yeast)	4932	352064	two hybrid prey pooling approach	MI:1112	0.67	nucleotide sequence identification	MI:0078	25416956	physical association	MI:0915	ALAS1 (physical association) POLDIP2	false	physical association	ALAS1 (physical association) POLDIP2
unspecified role	MI:0499	prey	MI:0498			false		unspecified role	MI:0499	bait	MI:0496		EBI-10308425	false		Saccharomyces cerevisiae (Baker's yeast)	4932	327204	two hybrid prey pooling approach	MI:1112	0.56	nucleotide sequence identification	MI:0078	25416956	physical association	MI:0915	ALAS1 (physical association) SH2D4A	false	physical association	ALAS1 (physical association) SH2D4A
unspecified role	MI:0499	prey	MI:0498			false		unspecified role	MI:0499	bait	MI:0496		EBI-10277207	false		Saccharomyces cerevisiae (Baker's yeast)	4932	283942	two hybrid prey pooling approach	MI:1112	0.72	nucleotide sequence identification	MI:0078	25416956	physical association	MI:0915	ALAS1 (physical association) TEKT4	false	physical association	ALAS1 (physical association) TEKT4
unspecified role	MI:0499	prey	MI:0498			false		unspecified role	MI:0499	bait	MI:0496		EBI-10273759	false		Saccharomyces cerevisiae (Baker's yeast)	4932	279235	two hybrid prey pooling approach	MI:1112	0.72	nucleotide sequence identification	MI:0078	25416956	physical association	MI:0915	ALAS1 (physical association) ZNF564	false	physical association	ALAS1 (physical association) ZNF564
unspecified role	MI:0499	prey	MI:0498			false		unspecified role	MI:0499	bait	MI:0496		EBI-10257934	false		Saccharomyces cerevisiae (Baker's yeast)	4932	258094	two hybrid prey pooling approach	MI:1112	0.56	nucleotide sequence identification	MI:0078	25416956	physical association	MI:0915	ALAS1 (physical association) SNX20	false	physical association	ALAS1 (physical association) SNX20
unspecified role	MI:0499	prey	MI:0498			false		unspecified role	MI:0499	bait	MI:0496	EBI-10252731	EBI-10252721	false		Saccharomyces cerevisiae (Baker's yeast)	4932	251409	two hybrid prey pooling approach	MI:1112	0.56	nucleotide sequence identification	MI:0078	25416956	physical association	MI:0915	ALAS1 (physical association) MTFR2	false	physical association	ALAS1 (physical association) MTFR2
unspecified role	MI:0499	prey	MI:0498			false		unspecified role	MI:0499	bait	MI:0496		EBI-10252282	false		Saccharomyces cerevisiae (Baker's yeast)	4932	250942	two hybrid prey pooling approach	MI:1112	0.78	nucleotide sequence identification	MI:0078	25416956	physical association	MI:0915	ALAS1 (physical association) CDC73	false	physical association	ALAS1 (physical association) CDC73
unspecified role	MI:0499	prey	MI:0498			false		unspecified role	MI:0499	bait	MI:0496		EBI-10241903	false		Saccharomyces cerevisiae (Baker's yeast)	4932	239047	two hybrid prey pooling approach	MI:1112	0.56	nucleotide sequence identification	MI:0078	25416956	physical association	MI:0915	ALAS1 (physical association) BCL7A	false	physical association	ALAS1 (physical association) BCL7A
unspecified role	MI:0499	prey	MI:0498			false		unspecified role	MI:0499	bait	MI:0496	EBI-10238742	EBI-10238732	false		Saccharomyces cerevisiae (Baker's yeast)	4932	235553	two hybrid prey pooling approach	MI:1112	0.72	nucleotide sequence identification	MI:0078	25416956	physical association	MI:0915	ALAS1 (physical association) LONRF1	false	physical association	ALAS1 (physical association) LONRF1
unspecified role	MI:0499	prey	MI:0498			false		unspecified role	MI:0499	bait	MI:0496		EBI-10236321	false		Saccharomyces cerevisiae (Baker's yeast)	4932	232745	two hybrid prey pooling approach	MI:1112	0.56	nucleotide sequence identification	MI:0078	25416956	physical association	MI:0915	ALAS1 (physical association) TCEA2	false	physical association	ALAS1 (physical association) TCEA2
unspecified role	MI:0499	prey	MI:0498			false		unspecified role	MI:0499	bait	MI:0496	EBI-10226594	EBI-10226584	false		Saccharomyces cerevisiae (Baker's yeast)	4932	220809	two hybrid prey pooling approach	MI:1112	0.56	nucleotide sequence identification	MI:0078	25416956	physical association	MI:0915	ALAS1 (physical association) TMSB4X	false	physical association	ALAS1 (physical association) TMSB4X
unspecified role	MI:0499	prey	MI:0498			false		unspecified role	MI:0499	bait	MI:0496		EBI-10220982	false		Saccharomyces cerevisiae (Baker's yeast)	4932	213148	two hybrid prey pooling approach	MI:1112	0.72	nucleotide sequence identification	MI:0078	25416956	physical association	MI:0915	ALAS1 (physical association) TMSB10	false	physical association	ALAS1 (physical association) TMSB10
unspecified role	MI:0499	prey	MI:0498			false		unspecified role	MI:0499	bait	MI:0496		EBI-10198022	false		Saccharomyces cerevisiae (Baker's yeast)	4932	181125	two hybrid prey pooling approach	MI:1112	0.56	nucleotide sequence identification	MI:0078	25416956	physical association	MI:0915	ALAS1 (physical association) 84460	false	physical association	ALAS1 (physical association) 84460
unspecified role	MI:0499	prey	MI:0498			false		unspecified role	MI:0499	bait	MI:0496		EBI-10186669	false		Saccharomyces cerevisiae (Baker's yeast)	4932	160451	two hybrid prey pooling approach	MI:1112	0.72	nucleotide sequence identification	MI:0078	25416956	physical association	MI:0915	ALAS1 (physical association) PPL	false	physical association	ALAS1 (physical association) PPL
				EBI-22893508|EBI-22436607	4	true	24912|24948|24978|25052|10126|10200|10230|10266					EBI-22436600|EBI-22893501		false							0.67						ALAS1 (interact with) ALAS1	false		ALAS1 (interact with) ALAS1
				EBI-7395257	1	true	24876|10302					EBI-7395254		false							0.37						ALAS1 (interact with) TK1	false		ALAS1 (interact with) TK1
				EBI-7393323	1	true	24878|10300					EBI-7393326		false							0.37						ALAS1 (interact with) SUMO2	false		ALAS1 (interact with) SUMO2
				EBI-7290343	1	true	24880|10298					EBI-7290340		false							0.37						ALAS1 (interact with) PIK3CB	false		ALAS1 (interact with) PIK3CB
				EBI-7271252	1	true	24882|10296					EBI-7271255		false							0.37						ALAS1 (interact with) NUDT3	false		ALAS1 (interact with) NUDT3
				EBI-7119717	1	true	24884|10294					EBI-7119714		false							0.37						ALAS1 (interact with) CDKN1A	false		ALAS1 (interact with) CDKN1A
				EBI-7119047	1	true	24886|10292					EBI-7119044		false							0.37						ALAS1 (interact with) CDK5	false		ALAS1 (interact with) CDK5
					1	true	24888|10290							false							0.37						ALAS1 (interact with) PLAU	false		ALAS1 (interact with) PLAU
					3	true	24890|24892|24894|10284|10286|10288							false							0.56						ALAS1 (interact with) DNALI1	false		ALAS1 (interact with) DNALI1
				EBI-23477864|EBI-25033300	6	true	24896|25236|24928|25238|25070|25106|9940|9942|10072|10108|10250|10282					EBI-25033293|EBI-23477857		false							0.72						ALAS1 (interact with) TMSB10	false		ALAS1 (interact with) TMSB10
				EBI-23109771|EBI-24978188	3	true	24898|25240|24936|9938|10242|10280					EBI-24978181|EBI-23109764		false							0.56						ALAS1 (interact with) UTP14C	false		ALAS1 (interact with) UTP14C
				EBI-24965908|EBI-23097693	6	true	24900|25242|24938|25044|25244|25088|9934|9936|10090|10134|10240|10278					EBI-24965901|EBI-23097686		false							0.72						ALAS1 (interact with) TEKT4	false		ALAS1 (interact with) TEKT4
				EBI-24948288|EBI-23080258	3	true	24902|25246|24940|9932|10238|10276					EBI-23080251|EBI-24948281		false							0.56						ALAS1 (interact with) MTSS2	false		ALAS1 (interact with) MTSS2
				EBI-23047966|EBI-24915590	3	true	24904|25248|24942|9930|10236|10274					EBI-23047959|EBI-24915583		false							0.56						ALAS1 (interact with) RNF168	false		ALAS1 (interact with) RNF168
				EBI-22983610|EBI-24850283	3	true	24906|25250|24944|9928|10234|10272					EBI-24850276|EBI-22983603		false							0.56						ALAS1 (interact with) PIBF1	false		ALAS1 (interact with) PIBF1
				EBI-22718788|EBI-23168298	3	true	24908|24932|24972|10206|10246|10270					EBI-23168291|EBI-22718781		false							0.56						ALAS1 (interact with) ccsb orf id: 10568	false		ALAS1 (interact with) ccsb orf id: 10568
				EBI-22449592|EBI-22906361	6	true	24910|24946|24976|25050|25080|25110|10068|10098|10128|10202|10232|10268					EBI-22906354|EBI-22449585		false							0.72						ALAS1 (interact with) PPL	false		ALAS1 (interact with) PPL
				EBI-22418801|EBI-22875992	3	true	24914|24950|24980|10198|10228|10264					EBI-22875985|EBI-22418794		false							0.56						ALAS1 (interact with) EP400	false		ALAS1 (interact with) EP400
				EBI-22872878|EBI-22415649	3	true	24916|24952|24982|10196|10226|10262					EBI-22872871|EBI-22415642		false							0.56						ALAS1 (interact with) COBL	false		ALAS1 (interact with) COBL
				EBI-22413333|EBI-22870622	3	true	24918|24954|24984|10194|10224|10260					EBI-22870615|EBI-22413326		false							0.56						ALAS1 (interact with) JRK	false		ALAS1 (interact with) JRK
				EBI-22863894|EBI-22406526	3	true	24920|24956|24986|10192|10222|10258					EBI-22863887|EBI-22406519		false							0.56						ALAS1 (interact with) GRXCR1	false		ALAS1 (interact with) GRXCR1
				EBI-22800676|EBI-22342446	3	true	24922|24968|24998|10180|10210|10256					EBI-22342439|EBI-22800669		false							0.56						ALAS1 (interact with) SNRPB2	false		ALAS1 (interact with) SNRPB2
				EBI-22796352|EBI-22338102	3	true	24924|24970|25000|10178|10208|10254					EBI-22338095|EBI-22796345		false							0.56						ALAS1 (interact with) HSBP1L1	false		ALAS1 (interact with) HSBP1L1
					3	true	25008|25548|25014|10164|10170|9630							false							0.56						ALAS1 (interact with) SRP1	false		ALAS1 (interact with) SRP1
					3	true	25024|25626|25092|10086|10154|9552							false							0.56						ALAS1 (interact with) SNX20	false		ALAS1 (interact with) SNX20
					5	true	25028|25064|25628|25094|25630|10084|10114|10150|9548|9550					EBI-10407832|EBI-10252731		false							0.56						ALAS1 (interact with) MTFR2	false		ALAS1 (interact with) MTFR2
					3	true	25030|25066|25098|10080|10112|10148							false							0.56						ALAS1 (interact with) BCL7A	false		ALAS1 (interact with) BCL7A
					3	true	25032|25640|25104|10074|10146|9538					EBI-10226594|EBI-10382870		false							0.56						ALAS1 (interact with) TMSB4X	false		ALAS1 (interact with) TMSB4X
					3	true	25034|25072|25108|10070|10106|10144							false							0.56						ALAS1 (interact with) 84460	false		ALAS1 (interact with) 84460
					3	true	25036|25074|25642|10104|10142|9536							false							0.56						ALAS1 (interact with) 7120	false		ALAS1 (interact with) 7120
					3	true	25038|25076|25644|10102|10140|9534							false							0.56						ALAS1 (interact with) 7116	false		ALAS1 (interact with) 7116
					3	true	25040|25078|25646|10100|10138|9532							false							0.56						ALAS1 (interact with) 7115	false		ALAS1 (interact with) 7115
					3	true	25048|25656|25102|10076|10130|9522							false							0.56						ALAS1 (interact with) TCEA2	false		ALAS1 (interact with) TCEA2
unspecified role	MI:0499	bait	MI:0496	EBI-8655024		false		unspecified role	MI:0499	prey	MI:0498	EBI-8655021	EBI-8655010	false		Saccharomyces cerevisiae	559292	11659352	two hybrid	MI:0018	0.83	predetermined participant	MI:0396	21516116	physical association	MI:0915	DUSP19 (physical association) ALAS1	false	physical association	DUSP19 (physical association) ALAS1
unspecified role	MI:0499	bait	MI:0496	EBI-24986794		false		unspecified role	MI:0499	prey	MI:0498	EBI-24986801	EBI-24986786	false		Saccharomyces cerevisiae (Baker's yeast)	4932	6975388	two hybrid prey pooling approach	MI:1112	0.83	nucleotide sequence identification	MI:0078	32296183	physical association	MI:0915	DUSP19 (physical association) ALAS1	false	physical association	DUSP19 (physical association) ALAS1
unspecified role	MI:0499	neutral component	MI:0497			false		unspecified role	MI:0499	neutral component	MI:0497		EBI-24469320	false		Saccharomyces cerevisiae (Baker's yeast)	4932	6574452	validated two hybrid	MI:1356	0.83	nucleotide sequence identification	MI:0078	32296183	physical association	MI:0915	DUSP19 (physical association) ALAS1	false	physical association	DUSP19 (physical association) ALAS1
unspecified role	MI:0499	bait	MI:0496	EBI-23118267		false		unspecified role	MI:0499	prey	MI:0498	EBI-23118274	EBI-23118259	false		Saccharomyces cerevisiae (Baker's yeast)	4932	5393410	two hybrid array	MI:0397	0.83	nucleotide sequence identification	MI:0078	32296183	physical association	MI:0915	DUSP19 (physical association) ALAS1	false	physical association	DUSP19 (physical association) ALAS1
unspecified role	MI:0499	bait	MI:0496	EBI-21761618		false		unspecified role	MI:0499	prey	MI:0498		EBI-21761614	false	spoke expansion	Homo sapiens 293 cells transformed with SV40 large T antigen	9606	4347494	anti tag coimmunoprecipitation	MI:0007	0.83	sequence tag identification	MI:0102	28514442	association	MI:0914	DUSP19 (association) ALAS1	false	association	DUSP19 (association) ALAS1
unspecified role	MI:0499	neutral component	MI:0497			false		unspecified role	MI:0499	neutral component	MI:0497		EBI-10513656	false		Saccharomyces cerevisiae (Baker's yeast)	4932	498725	validated two hybrid	MI:1356	0.83	nucleotide sequence identification	MI:0078	25416956	physical association	MI:0915	DUSP19 (physical association) ALAS1	false	physical association	DUSP19 (physical association) ALAS1
unspecified role	MI:0499	bait	MI:0496			false		unspecified role	MI:0499	prey	MI:0498		EBI-10430151	false		Saccharomyces cerevisiae (Baker's yeast)	4932	442269	two hybrid array	MI:0397	0.83	nucleotide sequence identification	MI:0078	25416956	physical association	MI:0915	DUSP19 (physical association) ALAS1	false	physical association	DUSP19 (physical association) ALAS1
unspecified role	MI:0499	bait	MI:0496			false		unspecified role	MI:0499	prey	MI:0498		EBI-10276088	false		Saccharomyces cerevisiae (Baker's yeast)	4932	282402	two hybrid prey pooling approach	MI:1112	0.83	nucleotide sequence identification	MI:0078	25416956	physical association	MI:0915	DUSP19 (physical association) ALAS1	false	physical association	DUSP19 (physical association) ALAS1
				EBI-8655024|EBI-21761618|EBI-23118267|EBI-24986794	8	true	25178|25180|25182|25184|25186|25188|25190|25192|9986|9988|9990|9992|9994|9996|9998|10000					EBI-8655021|EBI-24986801|EBI-23118274		false							0.83						DUSP19 (interact with) ALAS1	false		DUSP19 (interact with) ALAS1
unspecified role	MI:0499	bait	MI:0496	EBI-8634923		false		unspecified role	MI:0499	prey	MI:0498	EBI-8634920	EBI-8634909	false		Saccharomyces cerevisiae	559292	11636144	two hybrid	MI:0018	0.67	predetermined participant	MI:0396	21516116	physical association	MI:0915	POLDIP2 (physical association) ALAS1	false	physical association	POLDIP2 (physical association) ALAS1
unspecified role	MI:0499	bait	MI:0496			false		unspecified role	MI:0499	prey	MI:0498		EBI-10479341	false		Saccharomyces cerevisiae (Baker's yeast)	4932	474262	two hybrid array	MI:0397	0.67	nucleotide sequence identification	MI:0078	25416956	physical association	MI:0915	POLDIP2 (physical association) ALAS1	false	physical association	POLDIP2 (physical association) ALAS1
				EBI-8634923	4	true	25196|25042|25198|25084|9980|9982|10094|10136					EBI-8634920		false							0.67						POLDIP2 (interact with) ALAS1	false		POLDIP2 (interact with) ALAS1
unspecified role	MI:0499	bait	MI:0496	EBI-8634565		false		unspecified role	MI:0499	prey	MI:0498	EBI-8634568	EBI-8634554	false		Saccharomyces cerevisiae	559292	11635671	two hybrid	MI:0018	0.67	predetermined participant	MI:0396	21516116	physical association	MI:0915	EP400 (physical association) ALAS1	false	physical association	EP400 (physical association) ALAS1
unspecified role	MI:0499	bait	MI:0496			false		unspecified role	MI:0499	prey	MI:0498		EBI-10290521	false		Saccharomyces cerevisiae (Baker's yeast)	4932	302347	two hybrid prey pooling approach	MI:1112	0.67	nucleotide sequence identification	MI:0078	25416956	physical association	MI:0915	EP400 (physical association) ALAS1	false	physical association	EP400 (physical association) ALAS1
				EBI-8634565	4	true	25202|25022|25060|25204|9974|9976|10118|10156					EBI-8634568		false							0.67						EP400 (interact with) ALAS1	false		EP400 (interact with) ALAS1
unspecified role	MI:0499	bait	MI:0496	EBI-7337889		false		unspecified role	MI:0499	prey	MI:0498	EBI-7337886	EBI-7337872	false		Saccharomyces cerevisiae	559292	10512539	two hybrid	MI:0018	0.37	predetermined participant	MI:0396	21900206	physical association	MI:0915	RAP1B (physical association) ALAS1	false	physical association	RAP1B (physical association) ALAS1
				EBI-7337889	1	true	25208|9970					EBI-7337886		false							0.37						RAP1B (interact with) ALAS1	false		RAP1B (interact with) ALAS1
unspecified role	MI:0499	bait	MI:0496	EBI-7108782		false		unspecified role	MI:0499	prey	MI:0498	EBI-7108785	EBI-7108768	false		Saccharomyces cerevisiae	559292	10279290	two hybrid	MI:0018	0.37	predetermined participant	MI:0396	21900206	physical association	MI:0915	C8orf33 (physical association) ALAS1	false	physical association	C8orf33 (physical association) ALAS1
				EBI-7108782	1	true	25212|9966					EBI-7108785		false							0.37						C8orf33 (interact with) ALAS1	false		C8orf33 (interact with) ALAS1
unspecified role	MI:0499	bait	MI:0496	EBI-26509852		false		unspecified role	MI:0499	prey	MI:0498		EBI-26509845	false		Saccharomyces cerevisiae (Baker's yeast)	4932	8133784	two hybrid pooling approach	MI:0398	0.37	nucleotide sequence identification	MI:0078	21653829	physical association	MI:0915	FXR1 (physical association) ALAS1	false	physical association	FXR1 (physical association) ALAS1
				EBI-26509852	1	true	25216|9962							false							0.37						FXR1 (interact with) ALAS1	false		FXR1 (interact with) ALAS1
unspecified role	MI:0499	unspecified role	MI:0499			false		unspecified role	MI:0499	unspecified role	MI:0499		EBI-26295995	false		Homo sapiens transformed primary embryonal kidney cells	9606	8042325	luminescence based mammalian interactome mapping	MI:0729	0.68	predetermined participant	MI:0396	32814053	physical association	MI:0915	KLHL35 (physical association) ALAS1	false	physical association	KLHL35 (physical association) ALAS1
unspecified role	MI:0499	bait	MI:0496	EBI-10408526		false		unspecified role	MI:0499	prey	MI:0498		EBI-10408516	false		Saccharomyces cerevisiae (Baker's yeast)	4932	424491	two hybrid array	MI:0397	0.68	nucleotide sequence identification	MI:0078	25416956	physical association	MI:0915	KLHL35 (physical association) ALAS1	false	physical association	KLHL35 (physical association) ALAS1
unspecified role	MI:0499	bait	MI:0496	EBI-10253460		false		unspecified role	MI:0499	prey	MI:0498		EBI-10253450	false		Saccharomyces cerevisiae (Baker's yeast)	4932	252226	two hybrid prey pooling approach	MI:1112	0.68	nucleotide sequence identification	MI:0078	25416956	physical association	MI:0915	KLHL35 (physical association) ALAS1	false	physical association	KLHL35 (physical association) ALAS1
				EBI-10408526|EBI-10253460	4	true	25220|25026|25222|25224|9954|9956|9958|10152							false							0.68						KLHL35 (interact with) ALAS1	false		KLHL35 (interact with) ALAS1
unspecified role	MI:0499	neutral component	MI:0497			false		unspecified role	MI:0499	neutral component	MI:0497		EBI-26202483	false		Saccharomyces cerevisiae (Baker's yeast)	4932	7934116	validated two hybrid	MI:1356	0.56	predetermined participant	MI:0396	32814053	physical association	MI:0915	ICAM5 (physical association) ALAS1	false	physical association	ICAM5 (physical association) ALAS1
unspecified role	MI:0499	bait	MI:0496			false		unspecified role	MI:0499	prey	MI:0498		EBI-26048336	false		Saccharomyces cerevisiae (Baker's yeast)	4932	7761613	two hybrid pooling approach	MI:0398	0.56	predetermined participant	MI:0396	32814053	physical association	MI:0915	ICAM5 (physical association) ALAS1	false	physical association	ICAM5 (physical association) ALAS1
unspecified role	MI:0499	bait	MI:0496			false		unspecified role	MI:0499	prey	MI:0498		EBI-25893137	false		Saccharomyces cerevisiae (Baker's yeast)	4932	7603081	two hybrid array	MI:0397	0.56	predetermined participant	MI:0396	32814053	physical association	MI:0915	ICAM5 (physical association) ALAS1	false	physical association	ICAM5 (physical association) ALAS1
					3	true	25228|25230|25232|9946|9948|9950							false							0.56						ICAM5 (interact with) ALAS1	false		ICAM5 (interact with) ALAS1
unspecified role	MI:0499	neutral component	MI:0497			false		unspecified role	MI:0499	neutral component	MI:0497		EBI-24549779	false		Saccharomyces cerevisiae (Baker's yeast)	4932	6626108	validated two hybrid	MI:1356	0.72	nucleotide sequence identification	MI:0078	32296183	physical association	MI:0915	TMSB10 (physical association) ALAS1	false	physical association	TMSB10 (physical association) ALAS1
unspecified role	MI:0499	neutral component	MI:0497			false		unspecified role	MI:0499	neutral component	MI:0497		EBI-10513626	false		Saccharomyces cerevisiae (Baker's yeast)	4932	498707	validated two hybrid	MI:1356	0.72	nucleotide sequence identification	MI:0078	25416956	physical association	MI:0915	TMSB10 (physical association) ALAS1	false	physical association	TMSB10 (physical association) ALAS1
unspecified role	MI:0499	neutral component	MI:0497			false		unspecified role	MI:0499	neutral component	MI:0497		EBI-24464025	false		Saccharomyces cerevisiae (Baker's yeast)	4932	6571056	validated two hybrid	MI:1356	0.56	nucleotide sequence identification	MI:0078	32296183	physical association	MI:0915	UTP14C (physical association) ALAS1	false	physical association	UTP14C (physical association) ALAS1
unspecified role	MI:0499	neutral component	MI:0497			false		unspecified role	MI:0499	neutral component	MI:0497		EBI-24456524	false		Saccharomyces cerevisiae (Baker's yeast)	4932	6566214	validated two hybrid	MI:1356	0.72	nucleotide sequence identification	MI:0078	32296183	physical association	MI:0915	TEKT4 (physical association) ALAS1	false	physical association	TEKT4 (physical association) ALAS1
unspecified role	MI:0499	bait	MI:0496			false		unspecified role	MI:0499	prey	MI:0498		EBI-10431223	false		Saccharomyces cerevisiae (Baker's yeast)	4932	442971	two hybrid array	MI:0397	0.72	nucleotide sequence identification	MI:0078	25416956	physical association	MI:0915	TEKT4 (physical association) ALAS1	false	physical association	TEKT4 (physical association) ALAS1
unspecified role	MI:0499	neutral component	MI:0497			false		unspecified role	MI:0499	neutral component	MI:0497		EBI-24445720	false		Saccharomyces cerevisiae (Baker's yeast)	4932	6559305	validated two hybrid	MI:1356	0.56	nucleotide sequence identification	MI:0078	32296183	physical association	MI:0915	MTSS2 (physical association) ALAS1	false	physical association	MTSS2 (physical association) ALAS1
unspecified role	MI:0499	neutral component	MI:0497			false		unspecified role	MI:0499	neutral component	MI:0497		EBI-24425698	false		Saccharomyces cerevisiae (Baker's yeast)	4932	6546263	validated two hybrid	MI:1356	0.56	nucleotide sequence identification	MI:0078	32296183	physical association	MI:0915	RNF168 (physical association) ALAS1	false	physical association	RNF168 (physical association) ALAS1
unspecified role	MI:0499	neutral component	MI:0497			false		unspecified role	MI:0499	neutral component	MI:0497		EBI-24390220	false		Saccharomyces cerevisiae (Baker's yeast)	4932	6523321	validated two hybrid	MI:1356	0.56	nucleotide sequence identification	MI:0078	32296183	physical association	MI:0915	PIBF1 (physical association) ALAS1	false	physical association	PIBF1 (physical association) ALAS1
unspecified role	MI:0499	neutral component	MI:0497			false		unspecified role	MI:0499	neutral component	MI:0497		EBI-24617508	false		Saccharomyces cerevisiae (Baker's yeast)	4932	6670622	validated two hybrid	MI:1356	0.56	nucleotide sequence identification	MI:0078	32296183	physical association	MI:0915	FBXL8 (physical association) ALAS1	false	physical association	FBXL8 (physical association) ALAS1
				EBI-23596116|EBI-23371729	3	true	25252|24926|24930|9926|10248|10252					EBI-23371736|EBI-23596123		false							0.56						FBXL8 (interact with) ALAS1	false		FBXL8 (interact with) ALAS1
unspecified role	MI:0499	neutral component	MI:0497			false		unspecified role	MI:0499	neutral component	MI:0497		EBI-24491940	false		Saccharomyces cerevisiae (Baker's yeast)	4932	6589053	validated two hybrid	MI:1356	0.72	nucleotide sequence identification	MI:0078	32296183	physical association	MI:0915	RTL8B (physical association) ALAS1	false	physical association	RTL8B (physical association) ALAS1
unspecified role	MI:0499	neutral component	MI:0497			false		unspecified role	MI:0499	neutral component	MI:0497		EBI-10556850	false		Saccharomyces cerevisiae (Baker's yeast)	4932	524021	validated two hybrid	MI:1356	0.72	nucleotide sequence identification	MI:0078	25416956	physical association	MI:0915	RTL8B (physical association) ALAS1	false	physical association	RTL8B (physical association) ALAS1
unspecified role	MI:0499	bait	MI:0496			false		unspecified role	MI:0499	prey	MI:0498		EBI-10238620	false		Saccharomyces cerevisiae (Baker's yeast)	4932	235451	two hybrid prey pooling approach	MI:1112	0.72	nucleotide sequence identification	MI:0078	25416956	physical association	MI:0915	RTL8B (physical association) ALAS1	false	physical association	RTL8B (physical association) ALAS1
				EBI-22701269|EBI-23150949	6	true	25256|24934|24974|25258|25068|25260|9918|9920|9922|10110|10204|10244					EBI-22701276|EBI-23150956		false							0.72						RTL8B (interact with) ALAS1	false		RTL8B (interact with) ALAS1
unspecified role	MI:0499	neutral component	MI:0497	EBI-24326071		false		unspecified role	MI:0499	neutral component	MI:0497		EBI-24326061	false		Saccharomyces cerevisiae (Baker's yeast)	4932	6476918	validated two hybrid	MI:1356	0.72	nucleotide sequence identification	MI:0078	32296183	physical association	MI:0915	LONRF1 (physical association) ALAS1	false	physical association	LONRF1 (physical association) ALAS1
unspecified role	MI:0499	neutral component	MI:0497			false		unspecified role	MI:0499	neutral component	MI:0497		EBI-10556940	false		Saccharomyces cerevisiae (Baker's yeast)	4932	524075	validated two hybrid	MI:1356	0.72	nucleotide sequence identification	MI:0078	25416956	physical association	MI:0915	LONRF1 (physical association) ALAS1	false	physical association	LONRF1 (physical association) ALAS1
unspecified role	MI:0499	bait	MI:0496	EBI-10394601		false		unspecified role	MI:0499	prey	MI:0498		EBI-10394591	false		Saccharomyces cerevisiae (Baker's yeast)	4932	412165	two hybrid array	MI:0397	0.72	nucleotide sequence identification	MI:0078	25416956	physical association	MI:0915	LONRF1 (physical association) ALAS1	false	physical association	LONRF1 (physical association) ALAS1
				EBI-22396971|EBI-22854545|EBI-24326071|EBI-22854543|EBI-22396969|EBI-10394601|EBI-10238742	6	true	25264|24958|24988|25266|25268|25100|9910|9912|9914|10078|10190|10220					EBI-22854552|EBI-22396978		false							0.72						LONRF1 (interact with) ALAS1	false		LONRF1 (interact with) ALAS1
unspecified role	MI:0499	neutral component	MI:0497			false		unspecified role	MI:0499	neutral component	MI:0497		EBI-24323077	false		Saccharomyces cerevisiae (Baker's yeast)	4932	6474726	validated two hybrid	MI:1356	0.72	nucleotide sequence identification	MI:0078	32296183	physical association	MI:0915	ZNF564 (physical association) ALAS1	false	physical association	ZNF564 (physical association) ALAS1
unspecified role	MI:0499	bait	MI:0496			false		unspecified role	MI:0499	prey	MI:0498		EBI-10427873	false		Saccharomyces cerevisiae (Baker's yeast)	4932	440451	two hybrid array	MI:0397	0.72	nucleotide sequence identification	MI:0078	25416956	physical association	MI:0915	ZNF564 (physical association) ALAS1	false	physical association	ZNF564 (physical association) ALAS1
				EBI-22849725|EBI-22392124	6	true	25272|24960|24990|25046|25274|25090|9904|9906|10088|10132|10188|10218					EBI-22392131|EBI-22849732		false							0.72						ZNF564 (interact with) ALAS1	false		ZNF564 (interact with) ALAS1
unspecified role	MI:0499	neutral component	MI:0497			false		unspecified role	MI:0499	neutral component	MI:0497		EBI-24316559	false		Saccharomyces cerevisiae (Baker's yeast)	4932	6469861	validated two hybrid	MI:1356	0.56	nucleotide sequence identification	MI:0078	32296183	physical association	MI:0915	LRRC45 (physical association) ALAS1	false	physical association	LRRC45 (physical association) ALAS1
				EBI-22839182|EBI-22381554	3	true	25278|24962|24992|9900|10186|10216					EBI-22381561|EBI-22839189		false							0.56						LRRC45 (interact with) ALAS1	false		LRRC45 (interact with) ALAS1
unspecified role	MI:0499	neutral component	MI:0497			false		unspecified role	MI:0499	neutral component	MI:0497		EBI-24307696	false		Saccharomyces cerevisiae (Baker's yeast)	4932	6463775	validated two hybrid	MI:1356	0.72	nucleotide sequence identification	MI:0078	32296183	physical association	MI:0915	ZNF175 (physical association) ALAS1	false	physical association	ZNF175 (physical association) ALAS1
unspecified role	MI:0499	bait	MI:0496			false		unspecified role	MI:0499	prey	MI:0498		EBI-10328044	false		Saccharomyces cerevisiae (Baker's yeast)	4932	353863	two hybrid prey pooling approach	MI:1112	0.72	nucleotide sequence identification	MI:0078	25416956	physical association	MI:0915	ZNF175 (physical association) ALAS1	false	physical association	ZNF175 (physical association) ALAS1
				EBI-22824853|EBI-22367015	6	true	25282|24964|24994|25020|25054|25284|9894|9896|10124|10158|10184|10214					EBI-22367022|EBI-22824860		false							0.72						ZNF175 (interact with) ALAS1	false		ZNF175 (interact with) ALAS1
unspecified role	MI:0499	neutral component	MI:0497			false		unspecified role	MI:0499	neutral component	MI:0497		EBI-24295071	false		Saccharomyces cerevisiae (Baker's yeast)	4932	6454139	validated two hybrid	MI:1356	0.56	nucleotide sequence identification	MI:0078	32296183	physical association	MI:0915	CAP2 (physical association) ALAS1	false	physical association	CAP2 (physical association) ALAS1
unspecified role	MI:0499	prey	MI:0498	EBI-22771413		false		unspecified role	MI:0499	bait	MI:0496	EBI-22771406	EBI-22771398	false		Saccharomyces cerevisiae (Baker's yeast)	4932	5038639	two hybrid array	MI:0397	0.56	nucleotide sequence identification	MI:0078	32296183	physical association	MI:0915	CAP2 (physical association) ADO	false	physical association	CAP2 (physical association) ADO
unspecified role	MI:0499	prey	MI:0498	EBI-22312804		false		unspecified role	MI:0499	bait	MI:0496	EBI-22312797	EBI-22312789	false		Saccharomyces cerevisiae (Baker's yeast)	4932	4718358	two hybrid prey pooling approach	MI:1112	0.56	nucleotide sequence identification	MI:0078	32296183	physical association	MI:0915	CAP2 (physical association) ADO	false	physical association	CAP2 (physical association) ADO
				EBI-22804464|EBI-22346332	3	true	25288|24966|24996|9890|10182|10212					EBI-22346339|EBI-22804471		false							0.56						CAP2 (interact with) ALAS1	false		CAP2 (interact with) ALAS1
unspecified role	MI:0499	neutral component	MI:0497			false		unspecified role	MI:0499	neutral component	MI:0497		EBI-24290841	false		Saccharomyces cerevisiae (Baker's yeast)	4932	6450875	validated two hybrid	MI:1356	0.56	nucleotide sequence identification	MI:0078	32296183	physical association	MI:0915	KIF9 (physical association) ALAS1	false	physical association	KIF9 (physical association) ALAS1
unspecified role	MI:0499	bait	MI:0496	EBI-22797602		false		unspecified role	MI:0499	prey	MI:0498	EBI-22797609	EBI-22797594	false		Saccharomyces cerevisiae (Baker's yeast)	4932	5063757	two hybrid array	MI:0397	0.56	nucleotide sequence identification	MI:0078	32296183	physical association	MI:0915	KIF9 (physical association) ALAS1	false	physical association	KIF9 (physical association) ALAS1
unspecified role	MI:0499	bait	MI:0496	EBI-22339352		false		unspecified role	MI:0499	prey	MI:0498	EBI-22339359	EBI-22339344	false		Saccharomyces cerevisiae (Baker's yeast)	4932	4749578	two hybrid prey pooling approach	MI:1112	0.56	nucleotide sequence identification	MI:0078	32296183	physical association	MI:0915	KIF9 (physical association) ALAS1	false	physical association	KIF9 (physical association) ALAS1
				EBI-22339352|EBI-22797602	3	true	25296|25298|25300|9878|9880|9882					EBI-22797609|EBI-22339359		false							0.56						KIF9 (interact with) ALAS1	false		KIF9 (interact with) ALAS1
unspecified role	MI:0499	unspecified role	MI:0499	EBI-22135325|EBI-22135323|EBI-22135321		false		unspecified role	MI:0499	unspecified role	MI:0499		EBI-22135316	true		Saccharomyces cerevisiae (Baker's yeast)	4932	4629802	two hybrid array	MI:0397	0.78	predetermined participant	MI:0396	31515488	physical association	MI:0915	CDC73 (physical association) ALAS1	false	physical association	CDC73 (physical association) ALAS1
unspecified role	MI:0499	neutral component	MI:0497			false		unspecified role	MI:0499	neutral component	MI:0497		EBI-10571214	false		Saccharomyces cerevisiae (Baker's yeast)	4932	532535	validated two hybrid	MI:1356	0.78	nucleotide sequence identification	MI:0078	25416956	physical association	MI:0915	CDC73 (physical association) ALAS1	false	physical association	CDC73 (physical association) ALAS1
unspecified role	MI:0499	bait	MI:0496	EBI-10407432		false		unspecified role	MI:0499	prey	MI:0498		EBI-10407422	false		Saccharomyces cerevisiae (Baker's yeast)	4932	423435	two hybrid array	MI:0397	0.78	nucleotide sequence identification	MI:0078	25416956	physical association	MI:0915	CDC73 (physical association) ALAS1	false	physical association	CDC73 (physical association) ALAS1
unspecified role	MI:0499	bait	MI:0496			false		unspecified role	MI:0499	prey	MI:0498		EBI-10407412	false		Saccharomyces cerevisiae (Baker's yeast)	4932	423423	two hybrid array	MI:0397	0.78	nucleotide sequence identification	MI:0078	25416956	physical association	MI:0915	CDC73 (physical association) ALAS1	false	physical association	CDC73 (physical association) ALAS1
unspecified role	MI:0499	bait	MI:0496	EBI-10252302		false		unspecified role	MI:0499	prey	MI:0498		EBI-10252292	false		Saccharomyces cerevisiae (Baker's yeast)	4932	250954	two hybrid prey pooling approach	MI:1112	0.78	nucleotide sequence identification	MI:0078	25416956	physical association	MI:0915	CDC73 (physical association) ALAS1	false	physical association	CDC73 (physical association) ALAS1
				EBI-12714283|EBI-22135325|EBI-22135323|EBI-12728539|EBI-22135321|EBI-10407432|EBI-12714279|EBI-12728543|EBI-10252302	9	true	25304|25002|25004|25006|25306|25308|25310|25312|25096|9866|9868|9870|9872|9874|10082|10172|10174|10176							false							0.78						CDC73 (interact with) ALAS1	false		CDC73 (interact with) ALAS1
unspecified role	MI:0499	bait	MI:0496	EBI-21849410		false		unspecified role	MI:0499	prey	MI:0498		EBI-21849406	false	spoke expansion	Homo sapiens 293 cells transformed with SV40 large T antigen	9606	4432927	anti tag coimmunoprecipitation	MI:0007	0.35	sequence tag identification	MI:0102	28514442	association	MI:0914	RCHY1 (association) ALAS1	false	association	RCHY1 (association) ALAS1
				EBI-21849410	1	true	25316|9862							false							0.35						RCHY1 (interact with) ALAS1	false		RCHY1 (interact with) ALAS1
unspecified role	MI:0499	bait	MI:0496	EBI-21849368		false		unspecified role	MI:0499	prey	MI:0498		EBI-21849364	false	spoke expansion	Homo sapiens 293 cells transformed with SV40 large T antigen	9606	4432903	anti tag coimmunoprecipitation	MI:0007	0.35	sequence tag identification	MI:0102	28514442	association	MI:0914	MCAT (association) ALAS1	false	association	MCAT (association) ALAS1
				EBI-21849368	1	true	25320|9858							false							0.35						MCAT (interact with) ALAS1	false		MCAT (interact with) ALAS1
unspecified role	MI:0499	bait	MI:0496	EBI-21826111		false		unspecified role	MI:0499	prey	MI:0498		EBI-21826107	false	spoke expansion	Homo sapiens 293 cells transformed with SV40 large T antigen	9606	4409248	anti tag coimmunoprecipitation	MI:0007	0.35	sequence tag identification	MI:0102	28514442	association	MI:0914	PCK2 (association) ALAS1	false	association	PCK2 (association) ALAS1
				EBI-21826111	1	true	25324|9854							false							0.35						PCK2 (interact with) ALAS1	false		PCK2 (interact with) ALAS1
unspecified role	MI:0499	bait	MI:0496	EBI-21807085		false		unspecified role	MI:0499	prey	MI:0498		EBI-21807081	false	spoke expansion	Homo sapiens 293 cells transformed with SV40 large T antigen	9606	4390347	anti tag coimmunoprecipitation	MI:0007	0.35	sequence tag identification	MI:0102	28514442	association	MI:0914	HMGCL (association) ALAS1	false	association	HMGCL (association) ALAS1
				EBI-21807085	1	true	25328|9850							false							0.35						HMGCL (interact with) ALAS1	false		HMGCL (interact with) ALAS1
unspecified role	MI:0499	bait	MI:0496	EBI-21800277		false		unspecified role	MI:0499	prey	MI:0498		EBI-21800273	false	spoke expansion	Homo sapiens 293 cells transformed with SV40 large T antigen	9606	4383872	anti tag coimmunoprecipitation	MI:0007	0.35	sequence tag identification	MI:0102	28514442	association	MI:0914	FDPS (association) ALAS1	false	association	FDPS (association) ALAS1
unspecified role	MI:0499	bait	MI:0496	EBI-21800277		false		unspecified role	MI:0499	prey	MI:0498		EBI-21800273	false	spoke expansion	Homo sapiens 293 cells transformed with SV40 large T antigen	9606	4383867	anti tag coimmunoprecipitation	MI:0007	0.35	sequence tag identification	MI:0102	28514442	association	MI:0914	FDPS (association) GLDC	false	association	FDPS (association) GLDC
				EBI-21800277	1	true	25334|9844							false							0.35						FDPS (interact with) GLDC	false		FDPS (interact with) GLDC
				EBI-21800277	1	true	25332|9846							false							0.35						FDPS (interact with) ALAS1	false		FDPS (interact with) ALAS1
unspecified role	MI:0499	bait	MI:0496	EBI-21721473		false		unspecified role	MI:0499	prey	MI:0498		EBI-21721469	false	spoke expansion	Homo sapiens 293 cells transformed with SV40 large T antigen	9606	4310265	anti tag coimmunoprecipitation	MI:0007	0.35	sequence tag identification	MI:0102	28514442	association	MI:0914	THEM4 (association) ALAS1	false	association	THEM4 (association) ALAS1
				EBI-21721473	1	true	25340|9838							false							0.35						THEM4 (interact with) ALAS1	false		THEM4 (interact with) ALAS1
unspecified role	MI:0499	bait	MI:0496	EBI-21719482		false		unspecified role	MI:0499	prey	MI:0498		EBI-21719478	false	spoke expansion	Homo sapiens 293 cells transformed with SV40 large T antigen	9606	4308562	anti tag coimmunoprecipitation	MI:0007	0.35	sequence tag identification	MI:0102	28514442	association	MI:0914	CAMK2D (association) ALAS1	false	association	CAMK2D (association) ALAS1
				EBI-21719482	1	true	25344|9834							false							0.35						CAMK2D (interact with) ALAS1	false		CAMK2D (interact with) ALAS1
unspecified role	MI:0499	bait	MI:0496	EBI-21701244		false		unspecified role	MI:0499	prey	MI:0498		EBI-21701240	false	spoke expansion	Homo sapiens 293 cells transformed with SV40 large T antigen	9606	4291937	anti tag coimmunoprecipitation	MI:0007	0.35	sequence tag identification	MI:0102	28514442	association	MI:0914	TMOD3 (association) ALAS1	false	association	TMOD3 (association) ALAS1
				EBI-21701244	1	true	25348|9830							false							0.35						TMOD3 (interact with) ALAS1	false		TMOD3 (interact with) ALAS1
unspecified role	MI:0499	bait	MI:0496	EBI-21653359		false		unspecified role	MI:0499	prey	MI:0498		EBI-21653355	false	spoke expansion	Homo sapiens 293 cells transformed with SV40 large T antigen	9606	4248227	anti tag coimmunoprecipitation	MI:0007	0.35	sequence tag identification	MI:0102	28514442	association	MI:0914	NDUFS6 (association) ALAS1	false	association	NDUFS6 (association) ALAS1
				EBI-21653359	1	true	25352|9826							false							0.35						NDUFS6 (interact with) ALAS1	false		NDUFS6 (interact with) ALAS1
unspecified role	MI:0499	bait	MI:0496	EBI-21611957		false		unspecified role	MI:0499	prey	MI:0498		EBI-21611953	false	spoke expansion	Homo sapiens 293 cells transformed with SV40 large T antigen	9606	4209566	anti tag coimmunoprecipitation	MI:0007	0.48	sequence tag identification	MI:0102	28514442	association	MI:0914	TRMT61B (association) ALAS1	false	association	TRMT61B (association) ALAS1
unspecified role	MI:0499	bait	MI:0496	EBI-16802261		false		unspecified role	MI:0499	prey	MI:0498		EBI-16802257	false	spoke expansion	Homo sapiens	9606	3140485	proximity-dependent biotin identification	MI:1314	0.48	sequence tag identification	MI:0102	29568061	proximity	MI:2364	TRMT61B (proximity) ALAS1	false	proximity	TRMT61B (proximity) ALAS1
unspecified role	MI:0499	bait	MI:0496	EBI-16802261		false		unspecified role	MI:0499	prey	MI:0498		EBI-16802257	false	spoke expansion	Homo sapiens	9606	3140543	proximity-dependent biotin identification	MI:1314	0.27	sequence tag identification	MI:0102	29568061	proximity	MI:2364	TRMT61B (proximity) GATC	false	proximity	TRMT61B (proximity) GATC
unspecified role	MI:0499	bait	MI:0496	EBI-16802261		false		unspecified role	MI:0499	prey	MI:0498		EBI-16802257	false	spoke expansion	Homo sapiens	9606	3140595	proximity-dependent biotin identification	MI:1314	0.27	sequence tag identification	MI:0102	29568061	proximity	MI:2364	TRMT61B (proximity) YARS2	false	proximity	TRMT61B (proximity) YARS2
unspecified role	MI:0499	bait	MI:0496	EBI-16802261		false		unspecified role	MI:0499	prey	MI:0498		EBI-16802257	false	spoke expansion	Homo sapiens	9606	3140475	proximity-dependent biotin identification	MI:1314	0.27	sequence tag identification	MI:0102	29568061	proximity	MI:2364	TRMT61B (proximity) ME2	false	proximity	TRMT61B (proximity) ME2
unspecified role	MI:0499	bait	MI:0496	EBI-16802261		false		unspecified role	MI:0499	prey	MI:0498		EBI-16802257	false	spoke expansion	Homo sapiens	9606	3140664	proximity-dependent biotin identification	MI:1314	0.27	sequence tag identification	MI:0102	29568061	proximity	MI:2364	TRMT61B (proximity) SARS2	false	proximity	TRMT61B (proximity) SARS2
unspecified role	MI:0499	bait	MI:0496	EBI-16802261		false		unspecified role	MI:0499	prey	MI:0498		EBI-16802257	false	spoke expansion	Homo sapiens	9606	3140469	proximity-dependent biotin identification	MI:1314	0.27	sequence tag identification	MI:0102	29568061	proximity	MI:2364	TRMT61B (proximity) AK4	false	proximity	TRMT61B (proximity) AK4
unspecified role	MI:0499	bait	MI:0496	EBI-16802261		false		unspecified role	MI:0499	prey	MI:0498		EBI-16802257	false	spoke expansion	Homo sapiens	9606	3140373	proximity-dependent biotin identification	MI:1314	0.27	sequence tag identification	MI:0102	29568061	proximity	MI:2364	TRMT61B (proximity) LARS2	false	proximity	TRMT61B (proximity) LARS2
				EBI-16802261	1	true	25370|9808							false							0.27						TRMT61B (interact with) LARS2	false		TRMT61B (interact with) LARS2
				EBI-16802261|EBI-21611957	2	true	25356|25358|9820|9822							false							0.48						TRMT61B (interact with) ALAS1	false		TRMT61B (interact with) ALAS1
				EBI-16802261	1	true	25362|9816							false							0.27						TRMT61B (interact with) YARS2	false		TRMT61B (interact with) YARS2
				EBI-16802261	1	true	25360|9818							false							0.27						TRMT61B (interact with) GATC	false		TRMT61B (interact with) GATC
				EBI-16802261	1	true	25364|9814							false							0.27						TRMT61B (interact with) ME2	false		TRMT61B (interact with) ME2
				EBI-16802261	1	true	25366|9812							false							0.27						TRMT61B (interact with) SARS2	false		TRMT61B (interact with) SARS2
				EBI-16802261	1	true	25368|9810							false							0.27						TRMT61B (interact with) AK4	false		TRMT61B (interact with) AK4
unspecified role	MI:0499	bait	MI:0496	EBI-21609489		false		unspecified role	MI:0499	prey	MI:0498		EBI-21609485	false	spoke expansion	Homo sapiens 293 cells transformed with SV40 large T antigen	9606	4207268	anti tag coimmunoprecipitation	MI:0007	0.35	sequence tag identification	MI:0102	28514442	association	MI:0914	ECHDC2 (association) ALAS1	false	association	ECHDC2 (association) ALAS1
				EBI-21609489	1	true	25386|9792							false							0.35						ECHDC2 (interact with) ALAS1	false		ECHDC2 (interact with) ALAS1
unspecified role	MI:0499	bait	MI:0496	EBI-21602165		false		unspecified role	MI:0499	prey	MI:0498		EBI-21602161	false	spoke expansion	Homo sapiens 293 cells transformed with SV40 large T antigen	9606	4200365	anti tag coimmunoprecipitation	MI:0007	0.35	sequence tag identification	MI:0102	28514442	association	MI:0914	TMOD4 (association) ALAS1	false	association	TMOD4 (association) ALAS1
				EBI-21602165	1	true	25390|9788							false							0.35						TMOD4 (interact with) ALAS1	false		TMOD4 (interact with) ALAS1
unspecified role	MI:0499	bait	MI:0496	EBI-21586867		false		unspecified role	MI:0499	prey	MI:0498		EBI-21586863	false	spoke expansion	Homo sapiens 293 cells transformed with SV40 large T antigen	9606	4185955	anti tag coimmunoprecipitation	MI:0007	0.35	sequence tag identification	MI:0102	28514442	association	MI:0914	OXLD1 (association) ALAS1	false	association	OXLD1 (association) ALAS1
unspecified role	MI:0499	bait	MI:0496	EBI-21586867		false		unspecified role	MI:0499	prey	MI:0498		EBI-21586863	false	spoke expansion	Homo sapiens 293 cells transformed with SV40 large T antigen	9606	4185950	anti tag coimmunoprecipitation	MI:0007	0.35	sequence tag identification	MI:0102	28514442	association	MI:0914	OXLD1 (association) AK4	false	association	OXLD1 (association) AK4
				EBI-21586867	1	true	25394|9784							false							0.35						OXLD1 (interact with) ALAS1	false		OXLD1 (interact with) ALAS1
				EBI-21586867	1	true	25396|9782							false							0.35						OXLD1 (interact with) AK4	false		OXLD1 (interact with) AK4
unspecified role	MI:0499	bait	MI:0496	EBI-20810972		false		unspecified role	MI:0499	prey	MI:0498	EBI-20810968	EBI-20810964	false		Saccharomyces cerevisiae (Baker's yeast)	4932	3705100	ubiquitin reconstruction	MI:0112	0.37	predetermined participant	MI:0396	28298427	physical association	MI:0915	OXTR (physical association) ALAS1	false	physical association	OXTR (physical association) ALAS1
				EBI-20810972	1	true	25402|9776					EBI-20810968		false							0.37						OXTR (interact with) ALAS1	false		OXTR (interact with) ALAS1
unspecified role	MI:0499	bait	MI:0496	EBI-16796958		false		unspecified role	MI:0499	prey	MI:0498		EBI-16796954	false	spoke expansion	Homo sapiens	9606	3134852	proximity-dependent biotin identification	MI:1314	0.27	sequence tag identification	MI:0102	29568061	proximity	MI:2364	PDK1 (proximity) ALAS1	false	proximity	PDK1 (proximity) ALAS1
unspecified role	MI:0499	bait	MI:0496	EBI-16796958		false		unspecified role	MI:0499	prey	MI:0498		EBI-16796954	false	spoke expansion	Homo sapiens	9606	3134910	proximity-dependent biotin identification	MI:1314	0.27	sequence tag identification	MI:0102	29568061	proximity	MI:2364	PDK1 (proximity) GATC	false	proximity	PDK1 (proximity) GATC
unspecified role	MI:0499	bait	MI:0496	EBI-16796958		false		unspecified role	MI:0499	prey	MI:0498		EBI-16796954	false	spoke expansion	Homo sapiens	9606	3134498	proximity-dependent biotin identification	MI:1314	0.27	sequence tag identification	MI:0102	29568061	proximity	MI:2364	PDK1 (proximity) YARS2	false	proximity	PDK1 (proximity) YARS2
unspecified role	MI:0499	bait	MI:0496	EBI-16796958		false		unspecified role	MI:0499	prey	MI:0498		EBI-16796954	false	spoke expansion	Homo sapiens	9606	3134836	proximity-dependent biotin identification	MI:1314	0.27	sequence tag identification	MI:0102	29568061	proximity	MI:2364	PDK1 (proximity) ME2	false	proximity	PDK1 (proximity) ME2
unspecified role	MI:0499	bait	MI:0496	EBI-16796958		false		unspecified role	MI:0499	prey	MI:0498		EBI-16796954	false	spoke expansion	Homo sapiens	9606	3134542	proximity-dependent biotin identification	MI:1314	0.27	sequence tag identification	MI:0102	29568061	proximity	MI:2364	PDK1 (proximity) SARS2	false	proximity	PDK1 (proximity) SARS2
unspecified role	MI:0499	bait	MI:0496	EBI-16796958		false		unspecified role	MI:0499	prey	MI:0498		EBI-16796954	false	spoke expansion	Homo sapiens	9606	3134578	proximity-dependent biotin identification	MI:1314	0.27	sequence tag identification	MI:0102	29568061	proximity	MI:2364	PDK1 (proximity) TARS2	false	proximity	PDK1 (proximity) TARS2
unspecified role	MI:0499	bait	MI:0496	EBI-16796958		false		unspecified role	MI:0499	prey	MI:0498		EBI-16796954	false	spoke expansion	Homo sapiens	9606	3134830	proximity-dependent biotin identification	MI:1314	0.27	sequence tag identification	MI:0102	29568061	proximity	MI:2364	PDK1 (proximity) AK4	false	proximity	PDK1 (proximity) AK4
unspecified role	MI:0499	bait	MI:0496	EBI-16796958		false		unspecified role	MI:0499	prey	MI:0498		EBI-16796954	false	spoke expansion	Homo sapiens	9606	3134722	proximity-dependent biotin identification	MI:1314	0.27	sequence tag identification	MI:0102	29568061	proximity	MI:2364	PDK1 (proximity) LARS2	false	proximity	PDK1 (proximity) LARS2
				EBI-16796958	1	true	25420|9758							false							0.27						PDK1 (interact with) LARS2	false		PDK1 (interact with) LARS2
				EBI-16796958	1	true	25406|9772							false							0.27						PDK1 (interact with) ALAS1	false		PDK1 (interact with) ALAS1
				EBI-16796958	1	true	25410|9768							false							0.27						PDK1 (interact with) YARS2	false		PDK1 (interact with) YARS2
				EBI-16796958	1	true	25408|9770							false							0.27						PDK1 (interact with) GATC	false		PDK1 (interact with) GATC
				EBI-16796958	1	true	25412|9766							false							0.27						PDK1 (interact with) ME2	false		PDK1 (interact with) ME2
				EBI-16796958	1	true	25414|9764							false							0.27						PDK1 (interact with) SARS2	false		PDK1 (interact with) SARS2
				EBI-16796958	1	true	25418|9760							false							0.27						PDK1 (interact with) AK4	false		PDK1 (interact with) AK4
				EBI-16796958	1	true	25416|9762							false							0.27						PDK1 (interact with) TARS2	false		PDK1 (interact with) TARS2
unspecified role	MI:0499	bait	MI:0496	EBI-16796479		false		unspecified role	MI:0499	prey	MI:0498		EBI-16796475	false	spoke expansion	Homo sapiens	9606	3134381	proximity-dependent biotin identification	MI:1314	0.27	sequence tag identification	MI:0102	29568061	proximity	MI:2364	MGST3 (proximity) ALAS1	false	proximity	MGST3 (proximity) ALAS1
unspecified role	MI:0499	bait	MI:0496	EBI-16796479		false		unspecified role	MI:0499	prey	MI:0498		EBI-16796475	false	spoke expansion	Homo sapiens	9606	3134433	proximity-dependent biotin identification	MI:1314	0.27	sequence tag identification	MI:0102	29568061	proximity	MI:2364	MGST3 (proximity) GATC	false	proximity	MGST3 (proximity) GATC
unspecified role	MI:0499	bait	MI:0496	EBI-16796479		false		unspecified role	MI:0499	prey	MI:0498		EBI-16796475	false	spoke expansion	Homo sapiens	9606	3134023	proximity-dependent biotin identification	MI:1314	0.27	sequence tag identification	MI:0102	29568061	proximity	MI:2364	MGST3 (proximity) YARS2	false	proximity	MGST3 (proximity) YARS2
unspecified role	MI:0499	bait	MI:0496	EBI-16796479		false		unspecified role	MI:0499	prey	MI:0498		EBI-16796475	false	spoke expansion	Homo sapiens	9606	3134369	proximity-dependent biotin identification	MI:1314	0.27	sequence tag identification	MI:0102	29568061	proximity	MI:2364	MGST3 (proximity) ME2	false	proximity	MGST3 (proximity) ME2
unspecified role	MI:0499	bait	MI:0496	EBI-16796479		false		unspecified role	MI:0499	prey	MI:0498		EBI-16796475	false	spoke expansion	Homo sapiens	9606	3134076	proximity-dependent biotin identification	MI:1314	0.27	sequence tag identification	MI:0102	29568061	proximity	MI:2364	MGST3 (proximity) SARS2	false	proximity	MGST3 (proximity) SARS2
unspecified role	MI:0499	bait	MI:0496	EBI-16796479		false		unspecified role	MI:0499	prey	MI:0498		EBI-16796475	false	spoke expansion	Homo sapiens	9606	3134363	proximity-dependent biotin identification	MI:1314	0.27	sequence tag identification	MI:0102	29568061	proximity	MI:2364	MGST3 (proximity) AK4	false	proximity	MGST3 (proximity) AK4
unspecified role	MI:0499	bait	MI:0496	EBI-16796479		false		unspecified role	MI:0499	prey	MI:0498		EBI-16796475	false	spoke expansion	Homo sapiens	9606	3134253	proximity-dependent biotin identification	MI:1314	0.27	sequence tag identification	MI:0102	29568061	proximity	MI:2364	MGST3 (proximity) LARS2	false	proximity	MGST3 (proximity) LARS2
				EBI-16796479	1	true	25450|9728							false							0.27						MGST3 (interact with) LARS2	false		MGST3 (interact with) LARS2
				EBI-16796479	1	true	25438|9740							false							0.27						MGST3 (interact with) ALAS1	false		MGST3 (interact with) ALAS1
				EBI-16796479	1	true	25442|9736							false							0.27						MGST3 (interact with) YARS2	false		MGST3 (interact with) YARS2
				EBI-16796479	1	true	25440|9738							false							0.27						MGST3 (interact with) GATC	false		MGST3 (interact with) GATC
				EBI-16796479	1	true	25444|9734							false							0.27						MGST3 (interact with) ME2	false		MGST3 (interact with) ME2
				EBI-16796479	1	true	25446|9732							false							0.27						MGST3 (interact with) SARS2	false		MGST3 (interact with) SARS2
				EBI-16796479	1	true	25448|9730							false							0.27						MGST3 (interact with) AK4	false		MGST3 (interact with) AK4
unspecified role	MI:0499	bait	MI:0496	EBI-16790773		false		unspecified role	MI:0499	prey	MI:0498		EBI-16790769	false	spoke expansion	Homo sapiens	9606	3127659	proximity-dependent biotin identification	MI:1314	0.27	sequence tag identification	MI:0102	29568061	proximity	MI:2364	HSPD1 (proximity) ALAS1	false	proximity	HSPD1 (proximity) ALAS1
unspecified role	MI:0499	bait	MI:0496	EBI-16790773		false		unspecified role	MI:0499	prey	MI:0498		EBI-16790769	false	spoke expansion	Homo sapiens	9606	3127724	proximity-dependent biotin identification	MI:1314	0.27	sequence tag identification	MI:0102	29568061	proximity	MI:2364	HSPD1 (proximity) GATC	false	proximity	HSPD1 (proximity) GATC
unspecified role	MI:0499	bait	MI:0496	EBI-16790773		false		unspecified role	MI:0499	prey	MI:0498		EBI-16790769	false	spoke expansion	Homo sapiens	9606	3127305	proximity-dependent biotin identification	MI:1314	0.48	sequence tag identification	MI:0102	29568061	proximity	MI:2364	HSPD1 (proximity) YARS2	false	proximity	HSPD1 (proximity) YARS2
unspecified role	MI:0499	bait	MI:0496	EBI-16790773		false		unspecified role	MI:0499	prey	MI:0498		EBI-16790769	false	spoke expansion	Homo sapiens	9606	3127643	proximity-dependent biotin identification	MI:1314	0.27	sequence tag identification	MI:0102	29568061	proximity	MI:2364	HSPD1 (proximity) ME2	false	proximity	HSPD1 (proximity) ME2
unspecified role	MI:0499	bait	MI:0496	EBI-16790773		false		unspecified role	MI:0499	prey	MI:0498		EBI-16790769	false	spoke expansion	Homo sapiens	9606	3127351	proximity-dependent biotin identification	MI:1314	0.27	sequence tag identification	MI:0102	29568061	proximity	MI:2364	HSPD1 (proximity) SARS2	false	proximity	HSPD1 (proximity) SARS2
unspecified role	MI:0499	bait	MI:0496	EBI-16790773		false		unspecified role	MI:0499	prey	MI:0498		EBI-16790769	false	spoke expansion	Homo sapiens	9606	3127392	proximity-dependent biotin identification	MI:1314	0.27	sequence tag identification	MI:0102	29568061	proximity	MI:2364	HSPD1 (proximity) TARS2	false	proximity	HSPD1 (proximity) TARS2
unspecified role	MI:0499	bait	MI:0496	EBI-16790773		false		unspecified role	MI:0499	prey	MI:0498		EBI-16790769	false	spoke expansion	Homo sapiens	9606	3127637	proximity-dependent biotin identification	MI:1314	0.27	sequence tag identification	MI:0102	29568061	proximity	MI:2364	HSPD1 (proximity) AK4	false	proximity	HSPD1 (proximity) AK4
unspecified role	MI:0499	bait	MI:0496	EBI-21585971		false		unspecified role	MI:0499	prey	MI:0498		EBI-21585967	false	spoke expansion	Homo sapiens 293 cells transformed with SV40 large T antigen	9606	4184986	anti tag coimmunoprecipitation	MI:0007	0.35	sequence tag identification	MI:0102	28514442	association	MI:0914	HSPD1 (association) MARS2	false	association	HSPD1 (association) MARS2
unspecified role	MI:0499	bait	MI:0496	EBI-16790773		false		unspecified role	MI:0499	prey	MI:0498		EBI-16790769	false	spoke expansion	Homo sapiens	9606	3127529	proximity-dependent biotin identification	MI:1314	0.27	sequence tag identification	MI:0102	29568061	proximity	MI:2364	HSPD1 (proximity) LARS2	false	proximity	HSPD1 (proximity) LARS2
				EBI-16790773	1	true	25482|9696							false							0.27						HSPD1 (interact with) LARS2	false		HSPD1 (interact with) LARS2
				EBI-21585971	1	true	25480|9698							false							0.35						HSPD1 (interact with) MARS2	false		HSPD1 (interact with) MARS2
				EBI-16790773	1	true	25466|9712							false							0.27						HSPD1 (interact with) ALAS1	false		HSPD1 (interact with) ALAS1
				EBI-16790773	1	true	25468|9710							false							0.27						HSPD1 (interact with) GATC	false		HSPD1 (interact with) GATC
				EBI-16790773	1	true	25472|9706							false							0.27						HSPD1 (interact with) ME2	false		HSPD1 (interact with) ME2
				EBI-16790773	1	true	25474|9704							false							0.27						HSPD1 (interact with) SARS2	false		HSPD1 (interact with) SARS2
				EBI-16790773	1	true	25478|9700							false							0.27						HSPD1 (interact with) AK4	false		HSPD1 (interact with) AK4
				EBI-16790773	1	true	25476|9702							false							0.27						HSPD1 (interact with) TARS2	false		HSPD1 (interact with) TARS2
unspecified role	MI:0499	bait	MI:0496	EBI-16787303		false		unspecified role	MI:0499	prey	MI:0498		EBI-16787299	false	spoke expansion	Homo sapiens	9606	3123563	proximity-dependent biotin identification	MI:1314	0.27	sequence tag identification	MI:0102	29568061	proximity	MI:2364	aox (proximity) ALAS1	false	proximity	aox (proximity) ALAS1
unspecified role	MI:0499	bait	MI:0496	EBI-16787303		false		unspecified role	MI:0499	prey	MI:0498		EBI-16787299	false	spoke expansion	Homo sapiens	9606	3123615	proximity-dependent biotin identification	MI:1314	0.27	sequence tag identification	MI:0102	29568061	proximity	MI:2364	aox (proximity) GATC	false	proximity	aox (proximity) GATC
unspecified role	MI:0499	bait	MI:0496	EBI-16787303		false		unspecified role	MI:0499	prey	MI:0498		EBI-16787299	false	spoke expansion	Homo sapiens	9606	3122700	proximity-dependent biotin identification	MI:1314	0.27	sequence tag identification	MI:0102	29568061	proximity	MI:2364	aox (proximity) YARS2	false	proximity	aox (proximity) YARS2
unspecified role	MI:0499	bait	MI:0496	EBI-16787303		false		unspecified role	MI:0499	prey	MI:0498		EBI-16787299	false	spoke expansion	Homo sapiens	9606	3123549	proximity-dependent biotin identification	MI:1314	0.27	sequence tag identification	MI:0102	29568061	proximity	MI:2364	aox (proximity) ME2	false	proximity	aox (proximity) ME2
unspecified role	MI:0499	bait	MI:0496	EBI-16787303		false		unspecified role	MI:0499	prey	MI:0498		EBI-16787299	false	spoke expansion	Homo sapiens	9606	3122833	proximity-dependent biotin identification	MI:1314	0.27	sequence tag identification	MI:0102	29568061	proximity	MI:2364	aox (proximity) SARS2	false	proximity	aox (proximity) SARS2
unspecified role	MI:0499	bait	MI:0496	EBI-16787303		false		unspecified role	MI:0499	prey	MI:0498		EBI-16787299	false	spoke expansion	Homo sapiens	9606	3122879	proximity-dependent biotin identification	MI:1314	0.27	sequence tag identification	MI:0102	29568061	proximity	MI:2364	aox (proximity) TARS2	false	proximity	aox (proximity) TARS2
unspecified role	MI:0499	bait	MI:0496	EBI-16787303		false		unspecified role	MI:0499	prey	MI:0498		EBI-16787299	false	spoke expansion	Homo sapiens	9606	3123545	proximity-dependent biotin identification	MI:1314	0.27	sequence tag identification	MI:0102	29568061	proximity	MI:2364	aox (proximity) AK4	false	proximity	aox (proximity) AK4
unspecified role	MI:0499	bait	MI:0496	EBI-16787303		false		unspecified role	MI:0499	prey	MI:0498		EBI-16787299	false	spoke expansion	Homo sapiens	9606	3122940	proximity-dependent biotin identification	MI:1314	0.27	sequence tag identification	MI:0102	29568061	proximity	MI:2364	aox (proximity) MARS2	false	proximity	aox (proximity) MARS2
unspecified role	MI:0499	bait	MI:0496	EBI-16787303		false		unspecified role	MI:0499	prey	MI:0498		EBI-16787299	false	spoke expansion	Homo sapiens	9606	3123277	proximity-dependent biotin identification	MI:1314	0.27	sequence tag identification	MI:0102	29568061	proximity	MI:2364	aox (proximity) LARS2	false	proximity	aox (proximity) LARS2
				EBI-16787303	1	true	25516|9662							false							0.27						aox (interact with) LARS2	false		aox (interact with) LARS2
				EBI-16787303	1	true	25514|9664							false							0.27						aox (interact with) MARS2	false		aox (interact with) MARS2
				EBI-16787303	1	true	25500|9678							false							0.27						aox (interact with) ALAS1	false		aox (interact with) ALAS1
				EBI-16787303	1	true	25504|9674							false							0.27						aox (interact with) YARS2	false		aox (interact with) YARS2
				EBI-16787303	1	true	25502|9676							false							0.27						aox (interact with) GATC	false		aox (interact with) GATC
				EBI-16787303	1	true	25506|9672							false							0.27						aox (interact with) ME2	false		aox (interact with) ME2
				EBI-16787303	1	true	25508|9670							false							0.27						aox (interact with) SARS2	false		aox (interact with) SARS2
				EBI-16787303	1	true	25512|9666							false							0.27						aox (interact with) AK4	false		aox (interact with) AK4
				EBI-16787303	1	true	25510|9668							false							0.27						aox (interact with) TARS2	false		aox (interact with) TARS2
unspecified role	MI:0499	bait	MI:0496			false		unspecified role	MI:0499	prey	MI:0498		EBI-11559588	false		Saccharomyces cerevisiae (Baker's yeast)	4932	1282663	two hybrid array	MI:0397	0.56	nucleotide sequence identification	MI:0078	27107014	physical association	MI:0915	FAU1 (physical association) ALAS1	false	physical association	FAU1 (physical association) ALAS1
unspecified role	MI:0499	neutral component	MI:0497			false		unspecified role	MI:0499	neutral component	MI:0497		EBI-11549800	false		Saccharomyces cerevisiae (Baker's yeast)	4932	1271264	validated two hybrid	MI:1356	0.56	predetermined participant	MI:0396	27107014	physical association	MI:0915	FAU1 (physical association) ALAS1	false	physical association	FAU1 (physical association) ALAS1
					3	true	25536|25538|25018|10160|9640|9642							false							0.56						FAU1 (interact with) ALAS1	false		FAU1 (interact with) ALAS1
unspecified role	MI:0499	bait	MI:0496			false		unspecified role	MI:0499	prey	MI:0498		EBI-11556113	false		Saccharomyces cerevisiae (Baker's yeast)	4932	1280119	two hybrid array	MI:0397	0.56	nucleotide sequence identification	MI:0078	27107014	physical association	MI:0915	MRP4 (physical association) ALAS1	false	physical association	MRP4 (physical association) ALAS1
unspecified role	MI:0499	bait	MI:0496			false		unspecified role	MI:0499	prey	MI:0498		EBI-11526898	false		Saccharomyces cerevisiae (Baker's yeast)	4932	1243077	two hybrid pooling approach	MI:0398	0.56	nucleotide sequence identification	MI:0078	27107014	physical association	MI:0915	MRP4 (physical association) ALAS1	false	physical association	MRP4 (physical association) ALAS1
					3	true	25542|25010|25544|10168|9634|9636							false							0.56						MRP4 (interact with) ALAS1	false		MRP4 (interact with) ALAS1
unspecified role	MI:0499	bait	MI:0496			false		unspecified role	MI:0499	prey	MI:0498		EBI-11544891	false		Saccharomyces cerevisiae (Baker's yeast)	4932	1266210	two hybrid array	MI:0397	0.56	nucleotide sequence identification	MI:0078	27107014	physical association	MI:0915	SRP1 (physical association) ALAS1	false	physical association	SRP1 (physical association) ALAS1
unspecified role	MI:0499	neutral component	MI:0497			false		unspecified role	MI:0499	neutral component	MI:0497		EBI-11550336	false		Saccharomyces cerevisiae (Baker's yeast)	4932	1272074	validated two hybrid	MI:1356	0.56	predetermined participant	MI:0396	27107014	physical association	MI:0915	CAF40 (physical association) ALAS1	false	physical association	CAF40 (physical association) ALAS1
unspecified role	MI:0499	bait	MI:0496			false		unspecified role	MI:0499	prey	MI:0498		EBI-11533608	false		Saccharomyces cerevisiae (Baker's yeast)	4932	1252745	two hybrid pooling approach	MI:0398	0.56	nucleotide sequence identification	MI:0078	27107014	physical association	MI:0915	CAF40 (physical association) ALAS1	false	physical association	CAF40 (physical association) ALAS1
					3	true	25550|25012|25552|10166|9626|9628							false							0.56						CAF40 (interact with) ALAS1	false		CAF40 (interact with) ALAS1
unspecified role	MI:0499	neutral component	MI:0497			false		unspecified role	MI:0499	neutral component	MI:0497		EBI-11550180	false		Saccharomyces cerevisiae (Baker's yeast)	4932	1271840	validated two hybrid	MI:1356	0.56	predetermined participant	MI:0396	27107014	physical association	MI:0915	NUP57 (physical association) ALAS1	false	physical association	NUP57 (physical association) ALAS1
unspecified role	MI:0499	bait	MI:0496			false		unspecified role	MI:0499	prey	MI:0498		EBI-11543223	false		Saccharomyces cerevisiae (Baker's yeast)	4932	1264560	two hybrid array	MI:0397	0.56	nucleotide sequence identification	MI:0078	27107014	physical association	MI:0915	NUP57 (physical association) ALAS1	false	physical association	NUP57 (physical association) ALAS1
					3	true	25556|25558|25016|10162|9620|9622							false							0.56						NUP57 (interact with) ALAS1	false		NUP57 (interact with) ALAS1
unspecified role	MI:0499	bait	MI:0496			false		unspecified role	MI:0499	prey	MI:0498		EBI-11510873	false		Saccharomyces cerevisiae (Baker's yeast)	4932	1219796	two hybrid	MI:0018	0.37	nucleotide sequence identification	MI:0078	16730941	physical association	MI:0915	STAMBP (physical association) ALAS1	false	physical association	STAMBP (physical association) ALAS1
					1	true	25562|9616							false							0.37						STAMBP (interact with) ALAS1	false		STAMBP (interact with) ALAS1
unspecified role	MI:0499	bait	MI:0496	EBI-10897221		false		unspecified role	MI:0499	prey	MI:0498		EBI-10897112	false	spoke expansion	Homo sapiens 293 cells transformed with SV40 large T antigen	9606	736762	proximity-dependent biotin identification	MI:1314	0.27	sequence tag identification	MI:0102	26058080	proximity	MI:2364	CLPP (proximity) ALAS1	false	proximity	CLPP (proximity) ALAS1
unspecified role	MI:0499	bait	MI:0496	EBI-10897221		false		unspecified role	MI:0499	prey	MI:0498		EBI-10897112	false	spoke expansion	Homo sapiens 293 cells transformed with SV40 large T antigen	9606	736997	proximity-dependent biotin identification	MI:1314	0.27	sequence tag identification	MI:0102	26058080	proximity	MI:2364	CLPP (proximity) AK4	false	proximity	CLPP (proximity) AK4
				EBI-10897221	1	true	25566|9612							false							0.27						CLPP (interact with) ALAS1	false		CLPP (interact with) ALAS1
				EBI-10897221	1	true	25568|9610							false							0.27						CLPP (interact with) AK4	false		CLPP (interact with) AK4
unspecified role	MI:0499	bait	MI:0496	EBI-10715116		false		unspecified role	MI:0499	prey	MI:0498		EBI-10715009	false	spoke expansion	Human foetal lung fibroblast-like cell line	9606	648486	anti tag coimmunoprecipitation	MI:0007	0.35	sequence tag identification	MI:0102	25525879	association	MI:0914	SIRT4 (association) ALAS1	false	association	SIRT4 (association) ALAS1
unspecified role	MI:0499	bait	MI:0496	EBI-10715116		false		unspecified role	MI:0499	prey	MI:0498		EBI-10715009	false	spoke expansion	Human foetal lung fibroblast-like cell line	9606	647624	anti tag coimmunoprecipitation	MI:0007	0.35	sequence tag identification	MI:0102	25525879	association	MI:0914	SIRT4 (association) ME2	false	association	SIRT4 (association) ME2
unspecified role	MI:0499	bait	MI:0496	EBI-10715116		false		unspecified role	MI:0499	prey	MI:0498		EBI-10715009	false	spoke expansion	Human foetal lung fibroblast-like cell line	9606	646837	anti tag coimmunoprecipitation	MI:0007	0.35	sequence tag identification	MI:0102	25525879	association	MI:0914	SIRT4 (association) SARS2	false	association	SIRT4 (association) SARS2
				EBI-10715116	1	true	25574|9604							false							0.35						SIRT4 (interact with) ALAS1	false		SIRT4 (interact with) ALAS1
				EBI-10715116	1	true	25576|9602							false							0.35						SIRT4 (interact with) ME2	false		SIRT4 (interact with) ME2
				EBI-10715116	1	true	25578|9600							false							0.35						SIRT4 (interact with) SARS2	false		SIRT4 (interact with) SARS2
unspecified role	MI:0499	neutral component	MI:0497			false		unspecified role	MI:0499	neutral component	MI:0497		EBI-10631656	false		Saccharomyces cerevisiae (Baker's yeast)	4932	583169	validated two hybrid	MI:1356	0.56	nucleotide sequence identification	MI:0078	25416956	physical association	MI:0915	USP20 (physical association) ALAS1	false	physical association	USP20 (physical association) ALAS1
unspecified role	MI:0499	bait	MI:0496			false		unspecified role	MI:0499	prey	MI:0498		EBI-10326545	false		Saccharomyces cerevisiae (Baker's yeast)	4932	351769	two hybrid prey pooling approach	MI:1112	0.56	nucleotide sequence identification	MI:0078	25416956	physical association	MI:0915	USP20 (physical association) ALAS1	false	physical association	USP20 (physical association) ALAS1
					3	true	25586|25056|25588|10122|9590|9592							false							0.56						USP20 (interact with) ALAS1	false		USP20 (interact with) ALAS1
unspecified role	MI:0499	neutral component	MI:0497			false		unspecified role	MI:0499	neutral component	MI:0497		EBI-10623262	false		Saccharomyces cerevisiae (Baker's yeast)	4932	575350	validated two hybrid	MI:1356	0.56	nucleotide sequence identification	MI:0078	25416956	physical association	MI:0915	GNL3L (physical association) ALAS1	false	physical association	GNL3L (physical association) ALAS1
unspecified role	MI:0499	bait	MI:0496			false		unspecified role	MI:0499	prey	MI:0498		EBI-10467607	false		Saccharomyces cerevisiae (Baker's yeast)	4932	466654	two hybrid array	MI:0397	0.56	nucleotide sequence identification	MI:0078	25416956	physical association	MI:0915	GNL3L (physical association) ALAS1	false	physical association	GNL3L (physical association) ALAS1
unspecified role	MI:0499	bait	MI:0496			false		unspecified role	MI:0499	prey	MI:0498		EBI-10314679	false		Saccharomyces cerevisiae (Baker's yeast)	4932	336125	two hybrid prey pooling approach	MI:1112	0.56	nucleotide sequence identification	MI:0078	25416956	physical association	MI:0915	GNL3L (physical association) ALAS1	false	physical association	GNL3L (physical association) ALAS1
					3	true	25592|25594|25596|9582|9584|9586							false							0.56						GNL3L (interact with) ALAS1	false		GNL3L (interact with) ALAS1
unspecified role	MI:0499	neutral component	MI:0497			false		unspecified role	MI:0499	neutral component	MI:0497		EBI-10619396	false		Saccharomyces cerevisiae (Baker's yeast)	4932	571576	validated two hybrid	MI:1356	0.56	nucleotide sequence identification	MI:0078	25416956	physical association	MI:0915	SH2D4A (physical association) ALAS1	false	physical association	SH2D4A (physical association) ALAS1
					3	true	25600|25058|25086|10092|10120|9578							false							0.56						SH2D4A (interact with) ALAS1	false		SH2D4A (interact with) ALAS1
unspecified role	MI:0499	neutral component	MI:0497			false		unspecified role	MI:0499	neutral component	MI:0497		EBI-10602766	false		Saccharomyces cerevisiae (Baker's yeast)	4932	555226	validated two hybrid	MI:1356	0.56	nucleotide sequence identification	MI:0078	25416956	physical association	MI:0915	ZFYVE26 (physical association) ALAS1	false	physical association	ZFYVE26 (physical association) ALAS1
unspecified role	MI:0499	bait	MI:0496			false		unspecified role	MI:0499	prey	MI:0498		EBI-10440607	false		Saccharomyces cerevisiae (Baker's yeast)	4932	448923	two hybrid array	MI:0397	0.56	nucleotide sequence identification	MI:0078	25416956	physical association	MI:0915	ZFYVE26 (physical association) ALAS1	false	physical association	ZFYVE26 (physical association) ALAS1
unspecified role	MI:0499	bait	MI:0496			false		unspecified role	MI:0499	prey	MI:0498		EBI-10286939	false		Saccharomyces cerevisiae (Baker's yeast)	4932	297506	two hybrid prey pooling approach	MI:1112	0.56	nucleotide sequence identification	MI:0078	25416956	physical association	MI:0915	ZFYVE26 (physical association) ALAS1	false	physical association	ZFYVE26 (physical association) ALAS1
					3	true	25604|25606|25608|9570|9572|9574							false							0.56						ZFYVE26 (interact with) ALAS1	false		ZFYVE26 (interact with) ALAS1
unspecified role	MI:0499	neutral component	MI:0497			false		unspecified role	MI:0499	neutral component	MI:0497		EBI-10594680	false		Saccharomyces cerevisiae (Baker's yeast)	4932	546681	validated two hybrid	MI:1356	0.56	nucleotide sequence identification	MI:0078	25416956	physical association	MI:0915	CCHCR1 (physical association) ALAS1	false	physical association	CCHCR1 (physical association) ALAS1
unspecified role	MI:0499	bait	MI:0496	EBI-10274550		false		unspecified role	MI:0499	prey	MI:0498		EBI-10274540	false		Saccharomyces cerevisiae (Baker's yeast)	4932	280333	two hybrid prey pooling approach	MI:1112	0.56	nucleotide sequence identification	MI:0078	25416956	physical association	MI:0915	CCHCR1 (physical association) ALAS1	false	physical association	CCHCR1 (physical association) ALAS1
				EBI-10428631|EBI-10274550	3	true	25612|25062|25614|10116|9564|9566							false							0.56						CCHCR1 (interact with) ALAS1	false		CCHCR1 (interact with) ALAS1
unspecified role	MI:0499	neutral component	MI:0497			false		unspecified role	MI:0499	neutral component	MI:0497		EBI-10594238	false		Saccharomyces cerevisiae (Baker's yeast)	4932	546310	validated two hybrid	MI:1356	0.56	nucleotide sequence identification	MI:0078	25416956	physical association	MI:0915	CERK (physical association) ALAS1	false	physical association	CERK (physical association) ALAS1
unspecified role	MI:0499	bait	MI:0496			false		unspecified role	MI:0499	prey	MI:0498		EBI-10428351	false		Saccharomyces cerevisiae (Baker's yeast)	4932	440763	two hybrid array	MI:0397	0.56	nucleotide sequence identification	MI:0078	25416956	physical association	MI:0915	CERK (physical association) ALAS1	false	physical association	CERK (physical association) ALAS1
unspecified role	MI:0499	bait	MI:0496			false		unspecified role	MI:0499	prey	MI:0498		EBI-10274266	false		Saccharomyces cerevisiae (Baker's yeast)	4932	279890	two hybrid prey pooling approach	MI:1112	0.56	nucleotide sequence identification	MI:0078	25416956	physical association	MI:0915	CERK (physical association) ALAS1	false	physical association	CERK (physical association) ALAS1
					3	true	25618|25620|25622|9556|9558|9560							false							0.56						CERK (interact with) ALAS1	false		CERK (interact with) ALAS1
unspecified role	MI:0499	bait	MI:0496			false		unspecified role	MI:0499	prey	MI:0498		EBI-10412700	false		Saccharomyces cerevisiae (Baker's yeast)	4932	428326	two hybrid array	MI:0397	0.56	nucleotide sequence identification	MI:0078	25416956	physical association	MI:0915	SNX20 (physical association) ALAS1	false	physical association	SNX20 (physical association) ALAS1
unspecified role	MI:0499	bait	MI:0496			false		unspecified role	MI:0499	prey	MI:0498		EBI-10407812	false		Saccharomyces cerevisiae (Baker's yeast)	4932	423910	two hybrid array	MI:0397	0.56	nucleotide sequence identification	MI:0078	25416956	physical association	MI:0915	MTFR2 (physical association) ALAS1	false	physical association	MTFR2 (physical association) ALAS1
unspecified role	MI:0499	bait	MI:0496			false		unspecified role	MI:0499	prey	MI:0498		EBI-10252701	false		Saccharomyces cerevisiae (Baker's yeast)	4932	251395	two hybrid prey pooling approach	MI:1112	0.56	nucleotide sequence identification	MI:0078	25416956	physical association	MI:0915	MTFR2 (physical association) ALAS1	false	physical association	MTFR2 (physical association) ALAS1
unspecified role	MI:0499	neutral component	MI:0497			false		unspecified role	MI:0499	neutral component	MI:0497		EBI-10565184	false		Saccharomyces cerevisiae (Baker's yeast)	4932	528965	validated two hybrid	MI:1356	0.56	nucleotide sequence identification	MI:0078	25416956	physical association	MI:0915	TTC23 (physical association) ALAS1	false	physical association	TTC23 (physical association) ALAS1
unspecified role	MI:0499	bait	MI:0496			false		unspecified role	MI:0499	prey	MI:0498		EBI-10403614	false		Saccharomyces cerevisiae (Baker's yeast)	4932	420256	two hybrid array	MI:0397	0.56	nucleotide sequence identification	MI:0078	25416956	physical association	MI:0915	TTC23 (physical association) ALAS1	false	physical association	TTC23 (physical association) ALAS1
unspecified role	MI:0499	bait	MI:0496			false		unspecified role	MI:0499	prey	MI:0498		EBI-10248263	false		Saccharomyces cerevisiae (Baker's yeast)	4932	246017	two hybrid prey pooling approach	MI:1112	0.56	nucleotide sequence identification	MI:0078	25416956	physical association	MI:0915	TTC23 (physical association) ALAS1	false	physical association	TTC23 (physical association) ALAS1
					3	true	25632|25634|25636|9542|9544|9546							false							0.56						TTC23 (interact with) ALAS1	false		TTC23 (interact with) ALAS1
unspecified role	MI:0499	bait	MI:0496	EBI-10382870		false		unspecified role	MI:0499	prey	MI:0498		EBI-10382860	false		Saccharomyces cerevisiae (Baker's yeast)	4932	401971	two hybrid array	MI:0397	0.56	nucleotide sequence identification	MI:0078	25416956	physical association	MI:0915	TMSB4X (physical association) ALAS1	false	physical association	TMSB4X (physical association) ALAS1
unspecified role	MI:0499	bait	MI:0496			false		unspecified role	MI:0499	prey	MI:0498		EBI-10198006	false		Saccharomyces cerevisiae (Baker's yeast)	4932	181113	two hybrid prey pooling approach	MI:1112	0.56	nucleotide sequence identification	MI:0078	25416956	physical association	MI:0915	7120 (physical association) ALAS1	false	physical association	7120 (physical association) ALAS1
unspecified role	MI:0499	bait	MI:0496			false		unspecified role	MI:0499	prey	MI:0498		EBI-10197993	false		Saccharomyces cerevisiae (Baker's yeast)	4932	181101	two hybrid prey pooling approach	MI:1112	0.56	nucleotide sequence identification	MI:0078	25416956	physical association	MI:0915	7116 (physical association) ALAS1	false	physical association	7116 (physical association) ALAS1
unspecified role	MI:0499	bait	MI:0496			false		unspecified role	MI:0499	prey	MI:0498		EBI-10197983	false		Saccharomyces cerevisiae (Baker's yeast)	4932	181089	two hybrid prey pooling approach	MI:1112	0.56	nucleotide sequence identification	MI:0078	25416956	physical association	MI:0915	7115 (physical association) ALAS1	false	physical association	7115 (physical association) ALAS1
unspecified role	MI:0499	neutral component	MI:0497			false		unspecified role	MI:0499	neutral component	MI:0497		EBI-10513676	false		Saccharomyces cerevisiae (Baker's yeast)	4932	498737	validated two hybrid	MI:1356	0.56	nucleotide sequence identification	MI:0078	25416956	physical association	MI:0915	C2orf42 (physical association) ALAS1	false	physical association	C2orf42 (physical association) ALAS1
unspecified role	MI:0499	bait	MI:0496			false		unspecified role	MI:0499	prey	MI:0498		EBI-10468401	false		Saccharomyces cerevisiae (Baker's yeast)	4932	467134	two hybrid array	MI:0397	0.56	nucleotide sequence identification	MI:0078	25416956	physical association	MI:0915	C2orf42 (physical association) ALAS1	false	physical association	C2orf42 (physical association) ALAS1
unspecified role	MI:0499	bait	MI:0496			false		unspecified role	MI:0499	prey	MI:0498		EBI-10315503	false		Saccharomyces cerevisiae (Baker's yeast)	4932	337117	two hybrid prey pooling approach	MI:1112	0.56	nucleotide sequence identification	MI:0078	25416956	physical association	MI:0915	C2orf42 (physical association) ALAS1	false	physical association	C2orf42 (physical association) ALAS1
					3	true	25648|25650|25652|9526|9528|9530							false							0.56						C2orf42 (interact with) ALAS1	false		C2orf42 (interact with) ALAS1
unspecified role	MI:0499	bait	MI:0496			false		unspecified role	MI:0499	prey	MI:0498		EBI-10392296	false		Saccharomyces cerevisiae (Baker's yeast)	4932	410251	two hybrid array	MI:0397	0.56	nucleotide sequence identification	MI:0078	25416956	physical association	MI:0915	TCEA2 (physical association) ALAS1	false	physical association	TCEA2 (physical association) ALAS1
unspecified role	MI:0499	neutral component	MI:0497			false		unspecified role	MI:0499	neutral component	MI:0497		EBI-10513616	false		Saccharomyces cerevisiae (Baker's yeast)	4932	498701	validated two hybrid	MI:1356	0.56	nucleotide sequence identification	MI:0078	25416956	physical association	MI:0915	WIPF1 (physical association) ALAS1	false	physical association	WIPF1 (physical association) ALAS1
unspecified role	MI:0499	bait	MI:0496			false		unspecified role	MI:0499	prey	MI:0498		EBI-10184147	false		Saccharomyces cerevisiae (Baker's yeast)	4932	156172	two hybrid prey pooling approach	MI:1112	0.56	nucleotide sequence identification	MI:0078	25416956	physical association	MI:0915	WIPF1 (physical association) ALAS1	false	physical association	WIPF1 (physical association) ALAS1
					3	true	25658|25082|25660|10096|9518|9520							false							0.56						WIPF1 (interact with) ALAS1	false		WIPF1 (interact with) ALAS1
unspecified role	MI:0499	prey	MI:0498	EBI-6929467		false		unspecified role	MI:0499	bait	MI:0496	EBI-6929469	EBI-6929449	false		Saccharomyces cerevisiae (Baker's yeast)	4932	10100660	two hybrid	MI:0018	0.37	predetermined participant	MI:0396	24136289	physical association	MI:0915	GATC (physical association) q99ib8-pro_0000045598	false	physical association	GATC (physical association) q99ib8-pro_0000045598
unspecified role	MI:0499	prey	MI:0498	EBI-25210029		false		unspecified role	MI:0499	bait	MI:0496	EBI-25210022	EBI-25210014	false		Saccharomyces cerevisiae (Baker's yeast)	4932	7197635	two hybrid prey pooling approach	MI:1112	0.56	nucleotide sequence identification	MI:0078	32296183	physical association	MI:0915	GATC (physical association) SRSF11	false	physical association	GATC (physical association) SRSF11
unspecified role	MI:0499	prey	MI:0498	EBI-25122716		false		unspecified role	MI:0499	bait	MI:0496	EBI-25122709	EBI-25122701	false		Saccharomyces cerevisiae (Baker's yeast)	4932	7110618	two hybrid prey pooling approach	MI:1112	0.56	nucleotide sequence identification	MI:0078	32296183	physical association	MI:0915	GATC (physical association) HGS	false	physical association	GATC (physical association) HGS
unspecified role	MI:0499	neutral component	MI:0497			false		unspecified role	MI:0499	neutral component	MI:0497		EBI-24600771	false		Saccharomyces cerevisiae (Baker's yeast)	4932	6658861	validated two hybrid	MI:1356	0.56	nucleotide sequence identification	MI:0078	32296183	physical association	MI:0915	GATC (physical association) HGS	false	physical association	GATC (physical association) HGS
unspecified role	MI:0499	prey	MI:0498	EBI-24203161		false		unspecified role	MI:0499	bait	MI:0496	EBI-24203154	EBI-24203146	false		Saccharomyces cerevisiae (Baker's yeast)	4932	6362883	two hybrid array	MI:0397	0.56	nucleotide sequence identification	MI:0078	32296183	physical association	MI:0915	GATC (physical association) SRSF11	false	physical association	GATC (physical association) SRSF11
unspecified role	MI:0499	prey	MI:0498	EBI-24126400		false		unspecified role	MI:0499	bait	MI:0496	EBI-24126393	EBI-24126385	false		Saccharomyces cerevisiae (Baker's yeast)	4932	6268657	two hybrid array	MI:0397	0.56	nucleotide sequence identification	MI:0078	32296183	physical association	MI:0915	GATC (physical association) ALOX5	false	physical association	GATC (physical association) ALOX5
unspecified role	MI:0499	prey	MI:0498	EBI-23834608		false		unspecified role	MI:0499	bait	MI:0496	EBI-23834601	EBI-23834593	false		Saccharomyces cerevisiae (Baker's yeast)	4932	5999931	two hybrid prey pooling approach	MI:1112	0.56	nucleotide sequence identification	MI:0078	32296183	physical association	MI:0915	GATC (physical association) ALOX5	false	physical association	GATC (physical association) ALOX5
unspecified role	MI:0499	prey	MI:0498	EBI-23566938		false		unspecified role	MI:0499	bait	MI:0496	EBI-23566931	EBI-23566923	false		Saccharomyces cerevisiae (Baker's yeast)	4932	5755580	two hybrid array	MI:0397	0.56	nucleotide sequence identification	MI:0078	32296183	physical association	MI:0915	GATC (physical association) HGS	false	physical association	GATC (physical association) HGS
unspecified role	MI:0499	bait	MI:0496	EBI-21684185		false		unspecified role	MI:0499	prey	MI:0498		EBI-21684181	false	spoke expansion	Homo sapiens 293 cells transformed with SV40 large T antigen	9606	4276108	anti tag coimmunoprecipitation	MI:0007	0.35	sequence tag identification	MI:0102	28514442	association	MI:0914	GATC (association) NME4	false	association	GATC (association) NME4
unspecified role	MI:0499	bait	MI:0496	EBI-21684185		false		unspecified role	MI:0499	prey	MI:0498		EBI-21684181	false	spoke expansion	Homo sapiens 293 cells transformed with SV40 large T antigen	9606	4276103	anti tag coimmunoprecipitation	MI:0007	0.35	sequence tag identification	MI:0102	28514442	association	MI:0914	GATC (association) GATB	false	association	GATC (association) GATB
unspecified role	MI:0499	bait	MI:0496	EBI-21684185		false		unspecified role	MI:0499	prey	MI:0498		EBI-21684181	false	spoke expansion	Homo sapiens 293 cells transformed with SV40 large T antigen	9606	4276098	anti tag coimmunoprecipitation	MI:0007	0.35	sequence tag identification	MI:0102	28514442	association	MI:0914	GATC (association) FDXR	false	association	GATC (association) FDXR
unspecified role	MI:0499	bait	MI:0496	EBI-21684185		false		unspecified role	MI:0499	prey	MI:0498		EBI-21684181	false	spoke expansion	Homo sapiens 293 cells transformed with SV40 large T antigen	9606	4276093	anti tag coimmunoprecipitation	MI:0007	0.35	sequence tag identification	MI:0102	28514442	association	MI:0914	GATC (association) ALDH5A1	false	association	GATC (association) ALDH5A1
unspecified role	MI:0499	bait	MI:0496	EBI-21684185		false		unspecified role	MI:0499	prey	MI:0498		EBI-21684181	false	spoke expansion	Homo sapiens 293 cells transformed with SV40 large T antigen	9606	4276088	anti tag coimmunoprecipitation	MI:0007	0.35	sequence tag identification	MI:0102	28514442	association	MI:0914	GATC (association) POLG	false	association	GATC (association) POLG
unspecified role	MI:0499	bait	MI:0496	EBI-21684185		false		unspecified role	MI:0499	prey	MI:0498		EBI-21684181	false	spoke expansion	Homo sapiens 293 cells transformed with SV40 large T antigen	9606	4276083	anti tag coimmunoprecipitation	MI:0007	0.35	sequence tag identification	MI:0102	28514442	association	MI:0914	GATC (association) HIBCH	false	association	GATC (association) HIBCH
unspecified role	MI:0499	bait	MI:0496	EBI-21684185		false		unspecified role	MI:0499	prey	MI:0498		EBI-21684181	false	spoke expansion	Homo sapiens 293 cells transformed with SV40 large T antigen	9606	4276078	anti tag coimmunoprecipitation	MI:0007	0.35	sequence tag identification	MI:0102	28514442	association	MI:0914	GATC (association) D2HGDH	false	association	GATC (association) D2HGDH
unspecified role	MI:0499	bait	MI:0496	EBI-21684185		false		unspecified role	MI:0499	prey	MI:0498		EBI-21684181	false	spoke expansion	Homo sapiens 293 cells transformed with SV40 large T antigen	9606	4276073	anti tag coimmunoprecipitation	MI:0007	0.35	sequence tag identification	MI:0102	28514442	association	MI:0914	GATC (association) PDPR	false	association	GATC (association) PDPR
unspecified role	MI:0499	bait	MI:0496	EBI-21684185		false		unspecified role	MI:0499	prey	MI:0498		EBI-21684181	false	spoke expansion	Homo sapiens 293 cells transformed with SV40 large T antigen	9606	4276068	anti tag coimmunoprecipitation	MI:0007	0.35	sequence tag identification	MI:0102	28514442	association	MI:0914	GATC (association) DHTKD1	false	association	GATC (association) DHTKD1
unspecified role	MI:0499	bait	MI:0496	EBI-21684185		false		unspecified role	MI:0499	prey	MI:0498		EBI-21684181	false	spoke expansion	Homo sapiens 293 cells transformed with SV40 large T antigen	9606	4276063	anti tag coimmunoprecipitation	MI:0007	0.35	sequence tag identification	MI:0102	28514442	association	MI:0914	GATC (association) NARS2	false	association	GATC (association) NARS2
unspecified role	MI:0499	bait	MI:0496	EBI-21684185		false		unspecified role	MI:0499	prey	MI:0498		EBI-21684181	false	spoke expansion	Homo sapiens 293 cells transformed with SV40 large T antigen	9606	4276058	anti tag coimmunoprecipitation	MI:0007	0.35	sequence tag identification	MI:0102	28514442	association	MI:0914	GATC (association) THUMPD3	false	association	GATC (association) THUMPD3
unspecified role	MI:0499	bait	MI:0496	EBI-21684185		false		unspecified role	MI:0499	prey	MI:0498		EBI-21684181	false	spoke expansion	Homo sapiens 293 cells transformed with SV40 large T antigen	9606	4276053	anti tag coimmunoprecipitation	MI:0007	0.66	sequence tag identification	MI:0102	28514442	association	MI:0914	GATC (association) QRSL1	false	association	GATC (association) QRSL1
unspecified role	MI:0499	bait	MI:0496	EBI-21684185		false		unspecified role	MI:0499	prey	MI:0498		EBI-21684181	false	spoke expansion	Homo sapiens 293 cells transformed with SV40 large T antigen	9606	4276049	anti tag coimmunoprecipitation	MI:0007	0.35	sequence tag identification	MI:0102	28514442	association	MI:0914	GATC (association) NIPSNAP3A	false	association	GATC (association) NIPSNAP3A
unspecified role	MI:0499	bait	MI:0496	EBI-21684185		false		unspecified role	MI:0499	prey	MI:0498		EBI-21684181	false	spoke expansion	Homo sapiens 293 cells transformed with SV40 large T antigen	9606	4276044	anti tag coimmunoprecipitation	MI:0007	0.35	sequence tag identification	MI:0102	28514442	association	MI:0914	GATC (association) PUS1	false	association	GATC (association) PUS1
unspecified role	MI:0499	bait	MI:0496			false		unspecified role	MI:0499	prey	MI:0498		EBI-10185270	false		Saccharomyces cerevisiae (Baker's yeast)	4932	158024	two hybrid prey pooling approach	MI:1112	0.56	nucleotide sequence identification	MI:0078	25416956	physical association	MI:0915	GATC (physical association) SRSF11	false	physical association	GATC (physical association) SRSF11
unspecified role	MI:0499	bait	MI:0496			false		unspecified role	MI:0499	prey	MI:0498		EBI-10343102	false		Saccharomyces cerevisiae (Baker's yeast)	4932	368389	two hybrid array	MI:0397	0.56	nucleotide sequence identification	MI:0078	25416956	physical association	MI:0915	GATC (physical association) SRSF11	false	physical association	GATC (physical association) SRSF11
unspecified role	MI:0499	neutral component	MI:0497			false		unspecified role	MI:0499	neutral component	MI:0497		EBI-10503918	false		Saccharomyces cerevisiae (Baker's yeast)	4932	493027	validated two hybrid	MI:1356	0.56	nucleotide sequence identification	MI:0078	25416956	physical association	MI:0915	GATC (physical association) SRSF11	false	physical association	GATC (physical association) SRSF11
				EBI-6929467	1	true	25664|9514					EBI-6929469		false							0.37						GATC (interact with) q99ib8-pro_0000045598	false		GATC (interact with) q99ib8-pro_0000045598
				EBI-24203161|EBI-25210029|EBI-23153055|EBI-22703393	6	true	25666|25772|25774|25672|25776|25778|9400|9402|9404|9406|9506|9512					EBI-22703400|EBI-25210022|EBI-24203154|EBI-23153062		false							0.56						GATC (interact with) SRSF11	false		GATC (interact with) SRSF11
				EBI-25122716|EBI-23566938	3	true	25668|25670|25678|9500|9508|9510					EBI-25122709|EBI-23566931		false							0.56						GATC (interact with) HGS	false		GATC (interact with) HGS
				EBI-21684185	1	true	25680|9498							false							0.35						GATC (interact with) NME4	false		GATC (interact with) NME4
				EBI-21684185	1	true	25682|9496							false							0.35						GATC (interact with) GATB	false		GATC (interact with) GATB
				EBI-21684185	1	true	25684|9494							false							0.35						GATC (interact with) FDXR	false		GATC (interact with) FDXR
				EBI-21684185	1	true	25686|9492							false							0.35						GATC (interact with) ALDH5A1	false		GATC (interact with) ALDH5A1
				EBI-21684185	1	true	25688|9490							false							0.35						GATC (interact with) POLG	false		GATC (interact with) POLG
				EBI-21684185	1	true	25690|9488							false							0.35						GATC (interact with) HIBCH	false		GATC (interact with) HIBCH
				EBI-21684185	1	true	25692|9486							false							0.35						GATC (interact with) D2HGDH	false		GATC (interact with) D2HGDH
				EBI-21684185	1	true	25694|9484							false							0.35						GATC (interact with) PDPR	false		GATC (interact with) PDPR
				EBI-21684185	1	true	25696|9482							false							0.35						GATC (interact with) DHTKD1	false		GATC (interact with) DHTKD1
				EBI-21684185	1	true	25698|9480							false							0.35						GATC (interact with) NARS2	false		GATC (interact with) NARS2
				EBI-21684185	1	true	25700|9478							false							0.35						GATC (interact with) THUMPD3	false		GATC (interact with) THUMPD3
				EBI-21684185	3	true	25702|25814|25816|9362|9364|9476							false							0.66						GATC (interact with) QRSL1	false		GATC (interact with) QRSL1
				EBI-21684185	1	true	25704|9474							false							0.35						GATC (interact with) NIPSNAP3A	false		GATC (interact with) NIPSNAP3A
				EBI-21684185	1	true	25706|9472							false							0.35						GATC (interact with) PUS1	false		GATC (interact with) PUS1
					3	true	25708|25710|25712|9466|9468|9470							false							0.56						GATC (interact with) SRSF11	false		GATC (interact with) SRSF11
unspecified role	MI:0499	bait	MI:0496	EBI-27049331		false		unspecified role	MI:0499	prey	MI:0498		EBI-27049069	false	spoke expansion	human-Flp-In T-REx 293	9606	8486367	proximity-dependent biotin identification	MI:1314	0.27	sequence tag identification	MI:0102	31617661	proximity	MI:2364	IMMP2L (proximity) GATC	false	proximity	IMMP2L (proximity) GATC
unspecified role	MI:0499	bait	MI:0496	EBI-27049331		false		unspecified role	MI:0499	prey	MI:0498		EBI-27049069	false	spoke expansion	human-Flp-In T-REx 293	9606	8486287	proximity-dependent biotin identification	MI:1314	0.27	sequence tag identification	MI:0102	31617661	proximity	MI:2364	IMMP2L (proximity) ME2	false	proximity	IMMP2L (proximity) ME2
unspecified role	MI:0499	bait	MI:0496	EBI-27050605		false		unspecified role	MI:0499	prey	MI:0498		EBI-27050444	false	spoke expansion	human-Flp-In T-REx 293	9606	8488177	anti tag coimmunoprecipitation	MI:0007	0.35	sequence tag identification	MI:0102	31617661	association	MI:0914	IMMP2L (association) GCAT	false	association	IMMP2L (association) GCAT
unspecified role	MI:0499	bait	MI:0496	EBI-27050605		false		unspecified role	MI:0499	prey	MI:0498		EBI-27050444	false	spoke expansion	human-Flp-In T-REx 293	9606	8488261	anti tag coimmunoprecipitation	MI:0007	0.42	sequence tag identification	MI:0102	31617661	association	MI:0914	IMMP2L (association) EARS2	false	association	IMMP2L (association) EARS2
unspecified role	MI:0499	bait	MI:0496	EBI-27049331		false		unspecified role	MI:0499	prey	MI:0498		EBI-27049069	false	spoke expansion	human-Flp-In T-REx 293	9606	8486169	proximity-dependent biotin identification	MI:1314	0.42	sequence tag identification	MI:0102	31617661	proximity	MI:2364	IMMP2L (proximity) EARS2	false	proximity	IMMP2L (proximity) EARS2
unspecified role	MI:0499	bait	MI:0496	EBI-27049331		false		unspecified role	MI:0499	prey	MI:0498		EBI-27049069	false	spoke expansion	human-Flp-In T-REx 293	9606	8486191	proximity-dependent biotin identification	MI:1314	0.27	sequence tag identification	MI:0102	31617661	proximity	MI:2364	IMMP2L (proximity) LARS2	false	proximity	IMMP2L (proximity) LARS2
				EBI-27049331	1	true	25760|9418							false							0.27						IMMP2L (interact with) LARS2	false		IMMP2L (interact with) LARS2
				EBI-27049331|EBI-27050605	2	true	25756|25758|9420|9422							false							0.42						IMMP2L (interact with) EARS2	false		IMMP2L (interact with) EARS2
				EBI-27049331	1	true	25750|9428							false							0.27						IMMP2L (interact with) GATC	false		IMMP2L (interact with) GATC
				EBI-27049331	1	true	25752|9426							false							0.27						IMMP2L (interact with) ME2	false		IMMP2L (interact with) ME2
				EBI-27050605	1	true	25754|9424							false							0.35						IMMP2L (interact with) GCAT	false		IMMP2L (interact with) GCAT
unspecified role	MI:0499	neutral component	MI:0497			false		unspecified role	MI:0499	neutral component	MI:0497		EBI-24800838	false		Saccharomyces cerevisiae (Baker's yeast)	4932	6797006	validated two hybrid	MI:1356	0.56	nucleotide sequence identification	MI:0078	32296183	physical association	MI:0915	SRSF11 (physical association) GATC	false	physical association	SRSF11 (physical association) GATC
unspecified role	MI:0499	neutral component	MI:0497			false		unspecified role	MI:0499	neutral component	MI:0497		EBI-24493252	false		Saccharomyces cerevisiae (Baker's yeast)	4932	6589878	validated two hybrid	MI:1356	0.56	nucleotide sequence identification	MI:0078	32296183	physical association	MI:0915	SRSF11 (physical association) GATC	false	physical association	SRSF11 (physical association) GATC
unspecified role	MI:0499	prey	MI:0498	EBI-23153062		false		unspecified role	MI:0499	bait	MI:0496	EBI-23153055	EBI-23153047	false		Saccharomyces cerevisiae (Baker's yeast)	4932	5429825	two hybrid array	MI:0397	0.56	nucleotide sequence identification	MI:0078	32296183	physical association	MI:0915	SRSF11 (physical association) GATC	false	physical association	SRSF11 (physical association) GATC
unspecified role	MI:0499	prey	MI:0498	EBI-22703400		false		unspecified role	MI:0499	bait	MI:0496	EBI-22703393	EBI-22703385	false		Saccharomyces cerevisiae (Baker's yeast)	4932	4967579	two hybrid prey pooling approach	MI:1112	0.56	nucleotide sequence identification	MI:0078	32296183	physical association	MI:0915	SRSF11 (physical association) GATC	false	physical association	SRSF11 (physical association) GATC
unspecified role	MI:0499	prey	MI:0498	EBI-24931720		false		unspecified role	MI:0499	bait	MI:0496	EBI-24931713	EBI-24931705	false		Saccharomyces cerevisiae (Baker's yeast)	4932	6922761	two hybrid prey pooling approach	MI:1112	0.56	nucleotide sequence identification	MI:0078	32296183	physical association	MI:0915	ALOX5 (physical association) GATC	false	physical association	ALOX5 (physical association) GATC
unspecified role	MI:0499	neutral component	MI:0497			false		unspecified role	MI:0499	neutral component	MI:0497		EBI-24755850	false		Saccharomyces cerevisiae (Baker's yeast)	4932	6763782	validated two hybrid	MI:1356	0.56	nucleotide sequence identification	MI:0078	32296183	physical association	MI:0915	ALOX5 (physical association) GATC	false	physical association	ALOX5 (physical association) GATC
unspecified role	MI:0499	neutral component	MI:0497			false		unspecified role	MI:0499	neutral component	MI:0497		EBI-24435599	false		Saccharomyces cerevisiae (Baker's yeast)	4932	6552651	validated two hybrid	MI:1356	0.56	nucleotide sequence identification	MI:0078	32296183	physical association	MI:0915	ALOX5 (physical association) GATC	false	physical association	ALOX5 (physical association) GATC
unspecified role	MI:0499	prey	MI:0498	EBI-23063964		false		unspecified role	MI:0499	bait	MI:0496	EBI-23063957	EBI-23063949	false		Saccharomyces cerevisiae (Baker's yeast)	4932	5335994	two hybrid array	MI:0397	0.56	nucleotide sequence identification	MI:0078	32296183	physical association	MI:0915	ALOX5 (physical association) GATC	false	physical association	ALOX5 (physical association) GATC
				EBI-24931720|EBI-24126393|EBI-23063964|EBI-23834601	6	true	25780|25782|25784|25674|25676|25786|9392|9394|9396|9398|9502|9504					EBI-23063957|EBI-24126400|EBI-23834608|EBI-24931713		false							0.56						ALOX5 (interact with) GATC	false		ALOX5 (interact with) GATC
unspecified role	MI:0499	neutral component	MI:0497			false		unspecified role	MI:0499	neutral component	MI:0497		EBI-24662144	false		Saccharomyces cerevisiae (Baker's yeast)	4932	6703030	validated two hybrid	MI:1356	0.56	nucleotide sequence identification	MI:0078	32296183	physical association	MI:0915	TOMM20L (physical association) GATC	false	physical association	TOMM20L (physical association) GATC
unspecified role	MI:0499	prey	MI:0498	EBI-23966825		false		unspecified role	MI:0499	bait	MI:0496	EBI-23966818	EBI-23966810	false		Saccharomyces cerevisiae (Baker's yeast)	4932	6107304	two hybrid array	MI:0397	0.56	nucleotide sequence identification	MI:0078	32296183	physical association	MI:0915	TOMM20L (physical association) GATC	false	physical association	TOMM20L (physical association) GATC
unspecified role	MI:0499	prey	MI:0498	EBI-23673501		false		unspecified role	MI:0499	bait	MI:0496	EBI-23673494	EBI-23673486	false		Saccharomyces cerevisiae (Baker's yeast)	4932	5836372	two hybrid prey pooling approach	MI:1112	0.56	nucleotide sequence identification	MI:0078	32296183	physical association	MI:0915	TOMM20L (physical association) GATC	false	physical association	TOMM20L (physical association) GATC
				EBI-23966825|EBI-23673501	3	true	25790|25792|25794|9384|9386|9388					EBI-23673494|EBI-23966818		false							0.56						TOMM20L (interact with) GATC	false		TOMM20L (interact with) GATC
unspecified role	MI:0499	neutral component	MI:0497			false		unspecified role	MI:0499	neutral component	MI:0497		EBI-24294958	false		Saccharomyces cerevisiae (Baker's yeast)	4932	6454067	validated two hybrid	MI:1356	0.56	nucleotide sequence identification	MI:0078	32296183	physical association	MI:0915	CTAG1A (physical association) GATC	false	physical association	CTAG1A (physical association) GATC
unspecified role	MI:0499	prey	MI:0498	EBI-22804288		false		unspecified role	MI:0499	bait	MI:0496	EBI-22804281	EBI-22804273	false		Saccharomyces cerevisiae (Baker's yeast)	4932	5070192	two hybrid array	MI:0397	0.56	nucleotide sequence identification	MI:0078	32296183	physical association	MI:0915	CTAG1A (physical association) GATC	false	physical association	CTAG1A (physical association) GATC
unspecified role	MI:0499	prey	MI:0498	EBI-22346156		false		unspecified role	MI:0499	bait	MI:0496	EBI-22346149	EBI-22346141	false		Saccharomyces cerevisiae (Baker's yeast)	4932	4757002	two hybrid prey pooling approach	MI:1112	0.56	nucleotide sequence identification	MI:0078	32296183	physical association	MI:0915	CTAG1A (physical association) GATC	false	physical association	CTAG1A (physical association) GATC
				EBI-22346156|EBI-22804288	3	true	25798|25800|25802|9376|9378|9380					EBI-22346149|EBI-22804281		false							0.56						CTAG1A (interact with) GATC	false		CTAG1A (interact with) GATC
unspecified role	MI:0499	bait	MI:0496	EBI-21759324		false		unspecified role	MI:0499	prey	MI:0498		EBI-21759320	false	spoke expansion	Homo sapiens 293 cells transformed with SV40 large T antigen	9606	4345424	anti tag coimmunoprecipitation	MI:0007	0.35	sequence tag identification	MI:0102	28514442	association	MI:0914	MRPL42 (association) GATC	false	association	MRPL42 (association) GATC
				EBI-21759324	1	true	25806|9372							false							0.35						MRPL42 (interact with) GATC	false		MRPL42 (interact with) GATC
unspecified role	MI:0499	bait	MI:0496	EBI-21759305		false		unspecified role	MI:0499	prey	MI:0498		EBI-21759301	false	spoke expansion	Homo sapiens 293 cells transformed with SV40 large T antigen	9606	4345333	anti tag coimmunoprecipitation	MI:0007	0.35	sequence tag identification	MI:0102	28514442	association	MI:0914	CYP4V2 (association) GATC	false	association	CYP4V2 (association) GATC
				EBI-21759305	1	true	25810|9368							false							0.35						CYP4V2 (interact with) GATC	false		CYP4V2 (interact with) GATC
unspecified role	MI:0499	unspecified role	MI:0499			false		unspecified role	MI:0499	unspecified role	MI:0499		EBI-15806550	false		Escherichia coli	562	2462482	molecular sieving	MI:0071	0.66	predetermined participant	MI:0396	19805282	direct interaction	MI:0407	QRSL1 (direct interaction) GATC	false	direct interaction	QRSL1 (direct interaction) GATC
unspecified role	MI:0499	unspecified role	MI:0499			false		unspecified role	MI:0499	unspecified role	MI:0499		EBI-15806530	false	spoke expansion	In vitro	-1	2462449	molecular sieving	MI:0071	0.66	predetermined participant	MI:0396	19805282	physical association	MI:0915	QRSL1 (physical association) GATC	false	physical association	QRSL1 (physical association) GATC
unspecified role	MI:0499	bait	MI:0496	EBI-11103252		false		unspecified role	MI:0499	prey	MI:0498		EBI-11103090	false	spoke expansion	Homo sapiens epitheloid cervix carcinoma cells	9606	933665	anti tag coimmunoprecipitation	MI:0007	0.35	sequence tag identification	MI:0102	26496610	association	MI:0914	Hnrnpa3 (association) GATC	false	association	Hnrnpa3 (association) GATC
				EBI-11103252	1	true	25818|9360							false							0.35						Hnrnpa3 (interact with) GATC	false		Hnrnpa3 (interact with) GATC
unspecified role	MI:0499	bait	MI:0496	EBI-11133654		false		unspecified role	MI:0499	prey	MI:0498		EBI-11133607	false	spoke expansion	Homo sapiens epitheloid cervix carcinoma cells	9606	965203	anti tag coimmunoprecipitation	MI:0007	0.35	sequence tag identification	MI:0102	26496610	association	MI:0914	KDR (association) GATC	false	association	KDR (association) GATC
				EBI-11133654	1	true	25822|9356							false							0.35						KDR (interact with) GATC	false		KDR (interact with) GATC
unspecified role	MI:0499	bait	MI:0496	EBI-11137051		false		unspecified role	MI:0499	prey	MI:0498		EBI-11136905	false	spoke expansion	Homo sapiens epitheloid cervix carcinoma cells	9606	968363	anti tag coimmunoprecipitation	MI:0007	0.35	sequence tag identification	MI:0102	26496610	association	MI:0914	Washc1 (association) GATC	false	association	Washc1 (association) GATC
				EBI-11137051	1	true	25826|9352							false							0.35						Washc1 (interact with) GATC	false		Washc1 (interact with) GATC
unspecified role	MI:0499	neutral component	MI:0497			false		unspecified role	MI:0499	neutral component	MI:0497		EBI-24779095	false		Saccharomyces cerevisiae (Baker's yeast)	4932	6781201	validated two hybrid	MI:1356	0.72	nucleotide sequence identification	MI:0078	32296183	physical association	MI:0915	ARRDC3 (physical association) HPGDS	false	physical association	ARRDC3 (physical association) HPGDS
unspecified role	MI:0499	neutral component	MI:0497			false		unspecified role	MI:0499	neutral component	MI:0497		EBI-24568122	false		Saccharomyces cerevisiae (Baker's yeast)	4932	6637881	validated two hybrid	MI:1356	0.72	nucleotide sequence identification	MI:0078	32296183	physical association	MI:0915	ARRDC3 (physical association) HPGDS	false	physical association	ARRDC3 (physical association) HPGDS
unspecified role	MI:0499	prey	MI:0498	EBI-24166321		false		unspecified role	MI:0499	bait	MI:0496	EBI-24166314	EBI-24166306	false		Saccharomyces cerevisiae (Baker's yeast)	4932	6318193	two hybrid array	MI:0397	0.72	nucleotide sequence identification	MI:0078	32296183	physical association	MI:0915	ARRDC3 (physical association) HPGDS	false	physical association	ARRDC3 (physical association) HPGDS
unspecified role	MI:0499	prey	MI:0498	EBI-23874824		false		unspecified role	MI:0499	bait	MI:0496	EBI-23874817	EBI-23874809	false		Saccharomyces cerevisiae (Baker's yeast)	4932	6023779	two hybrid prey pooling approach	MI:1112	0.72	nucleotide sequence identification	MI:0078	32296183	physical association	MI:0915	ARRDC3 (physical association) HPGDS	false	physical association	ARRDC3 (physical association) HPGDS
unspecified role	MI:0499	neutral component	MI:0497			false		unspecified role	MI:0499	neutral component	MI:0497		EBI-10505844	false		Saccharomyces cerevisiae (Baker's yeast)	4932	494167	validated two hybrid	MI:1356	0.72	nucleotide sequence identification	MI:0078	25416956	physical association	MI:0915	ARRDC3 (physical association) HPGDS	false	physical association	ARRDC3 (physical association) HPGDS
unspecified role	MI:0499	prey	MI:0498			false		unspecified role	MI:0499	bait	MI:0496		EBI-10187354	false		Saccharomyces cerevisiae (Baker's yeast)	4932	161530	two hybrid prey pooling approach	MI:1112	0.72	nucleotide sequence identification	MI:0078	25416956	physical association	MI:0915	ARRDC3 (physical association) HPGDS	false	physical association	ARRDC3 (physical association) HPGDS
unspecified role	MI:0499	prey	MI:0498	EBI-25065473		false		unspecified role	MI:0499	bait	MI:0496	EBI-25065466	EBI-25065458	false		Saccharomyces cerevisiae (Baker's yeast)	4932	7052220	two hybrid prey pooling approach	MI:1112	0.72	nucleotide sequence identification	MI:0078	32296183	physical association	MI:0915	HPGDS (physical association) ARRDC3	false	physical association	HPGDS (physical association) ARRDC3
unspecified role	MI:0499	prey	MI:0498	EBI-24996193		false		unspecified role	MI:0499	bait	MI:0496	EBI-24996186	EBI-24996178	false		Saccharomyces cerevisiae (Baker's yeast)	4932	6984397	two hybrid prey pooling approach	MI:1112	0.56	nucleotide sequence identification	MI:0078	32296183	physical association	MI:0915	HPGDS (physical association) LIF	false	physical association	HPGDS (physical association) LIF
unspecified role	MI:0499	prey	MI:0498	EBI-23509947		false		unspecified role	MI:0499	bait	MI:0496	EBI-23509940	EBI-23509932	false		Saccharomyces cerevisiae (Baker's yeast)	4932	5692391	two hybrid array	MI:0397	0.72	nucleotide sequence identification	MI:0078	32296183	physical association	MI:0915	HPGDS (physical association) ARRDC3	false	physical association	HPGDS (physical association) ARRDC3
unspecified role	MI:0499	prey	MI:0498	EBI-23127500		false		unspecified role	MI:0499	bait	MI:0496	EBI-23127493	EBI-23127485	false		Saccharomyces cerevisiae (Baker's yeast)	4932	5403355	two hybrid array	MI:0397	0.56	nucleotide sequence identification	MI:0078	32296183	physical association	MI:0915	HPGDS (physical association) LIF	false	physical association	HPGDS (physical association) LIF
unspecified role	MI:0499	unspecified role	MI:0499	EBI-22140741		false		unspecified role	MI:0499	unspecified role	MI:0499		EBI-22140736	true		Saccharomyces cerevisiae (Baker's yeast)	4932	4638209	two hybrid array	MI:0397	0.67	predetermined participant	MI:0396	31515488	physical association	MI:0915	HPGDS (physical association) ABHD17A	false	physical association	HPGDS (physical association) ABHD17A
unspecified role	MI:0499	neutral component	MI:0497			false		unspecified role	MI:0499	neutral component	MI:0497		EBI-10505854	false		Saccharomyces cerevisiae (Baker's yeast)	4932	494173	validated two hybrid	MI:1356	0.67	nucleotide sequence identification	MI:0078	25416956	physical association	MI:0915	HPGDS (physical association) ABHD17A	false	physical association	HPGDS (physical association) ABHD17A
unspecified role	MI:0499	neutral component	MI:0497			false		unspecified role	MI:0499	neutral component	MI:0497		EBI-10505834	false		Saccharomyces cerevisiae (Baker's yeast)	4932	494161	validated two hybrid	MI:1356	0.56	nucleotide sequence identification	MI:0078	25416956	physical association	MI:0915	HPGDS (physical association) MELTF	false	physical association	HPGDS (physical association) MELTF
unspecified role	MI:0499	prey	MI:0498			false		unspecified role	MI:0499	bait	MI:0496		EBI-10353389	false		Saccharomyces cerevisiae (Baker's yeast)	4932	377339	two hybrid array	MI:0397	0.56	nucleotide sequence identification	MI:0078	25416956	physical association	MI:0915	HPGDS (physical association) MELTF	false	physical association	HPGDS (physical association) MELTF
unspecified role	MI:0499	bait	MI:0496			false		unspecified role	MI:0499	prey	MI:0498		EBI-10345122	false		Saccharomyces cerevisiae (Baker's yeast)	4932	370109	two hybrid array	MI:0397	0.72	nucleotide sequence identification	MI:0078	25416956	physical association	MI:0915	HPGDS (physical association) ARRDC3	false	physical association	HPGDS (physical association) ARRDC3
				EBI-24166314|EBI-23509947|EBI-25065473|EBI-23874817	9	true	25842|25830|25832|25834|25836|25846|25838|25858|25840|9320|9332|9336|9338|9340|9342|9344|9346|9348					EBI-23874824|EBI-23509940|EBI-25065466|EBI-24166321		false							0.72						HPGDS (interact with) ARRDC3	false		HPGDS (interact with) ARRDC3
				EBI-23127500|EBI-24996193	3	true	25844|25868|25848|9310|9330|9334					EBI-24996186|EBI-23127493		false							0.56						HPGDS (interact with) LIF	false		HPGDS (interact with) LIF
				EBI-22140741	4	true	25850|25852|25894|25896|9282|9284|9326|9328							false							0.67						HPGDS (interact with) ABHD17A	false		HPGDS (interact with) ABHD17A
					3	true	25854|25856|25906|9272|9322|9324							false							0.56						HPGDS (interact with) MELTF	false		HPGDS (interact with) MELTF
unspecified role	MI:0499	neutral component	MI:0497			false		unspecified role	MI:0499	neutral component	MI:0497		EBI-24475067	false		Saccharomyces cerevisiae (Baker's yeast)	4932	6578190	validated two hybrid	MI:1356	0.56	nucleotide sequence identification	MI:0078	32296183	physical association	MI:0915	LIF (physical association) HPGDS	false	physical association	LIF (physical association) HPGDS
[truncated: 3,248 more rows]

## Sheet: Supp Sheet S3
Interactor A	Interactor B	Preferred ID for A (UniProt, IntAct)	Preferred ID for B (UniProt, IntAct)
[truncated: 501 more rows]

[truncated: 2 more sheets: Supp Sheet S4, Supp Sheet S5]
